# Supplementary material for: A Carbene‐Extended ATRA Reaction
Source: PubMed Central journal article supplement — Angew Chem Int Ed Engl. 2019 Oct 15;58(48):17241–5. doi: 10.1002/anie.201909872 (PMC6900008; doi:10.1002/anie.201909872), 2019-10-15

## Supporting Information

### **A Carbene-Extended ATRA Reaction**

*Guojiao Wu,\* Jennifer Börger, and Axel Jacobi von Wangelin\**

anie\_201909872\_sm\_miscellaneous\_information.pdf

## *Table of contents*

|                                                                          |            |
|--------------------------------------------------------------------------|------------|
| 1. General experimental methods.....                                     | <b>S2</b>  |
| 2. General procedure and characterization data .....                     | <b>S2</b>  |
| 3. Gram scale experiments .....                                          | <b>S14</b> |
| 4. Follow-up reactions .....                                             | <b>S15</b> |
| 4. Reference.....                                                        | <b>S18</b> |
| 5. <sup>1</sup> H, <sup>13</sup> C and <sup>19</sup> F NMR spectra ..... | <b>S19</b> |

## 1. General experimental methods.

Reagents were purchased from commercial suppliers and used without further purification. THF, toluene, and hexane, ethyl ether were used after distillation with the sodium. Dry acetonitrile and dichloromethane were purchased from Acros Organics. Column chromatography was performed on 35-70 mesh silica gel (Acros Organics).  $^1\text{H}$  (300 Hz),  $^{13}\text{C}$  (75 Hz),  $^{19}\text{F}$  (125 Hz) spectra were recorded on a Bruker Avance Kryo spectrometer using  $\text{CDCl}_3$  as solvent. Chemical shifts are reported in ppm and referenced to residual solvent signal ( $\text{CDCl}_3$ :  $^1\text{H}$  NMR:  $\delta$  7.26 ppm,  $^{13}\text{C}$  NMR:  $\delta$  77.0 ppm). High Resolution Mass Spectrometry (HRMS) were on Finnigan MAT 900s. GC-yields was obtained using dodecane as internal standard with gas chromatography with FID (GC-FID, HP6890 GC-System with injector 7683B and Agilent 7820A System, carried recorded gas:  $\text{H}_2$ ). The *stereo* was determined by comparing with the similar  $\text{CF}_3$  compound reported<sup>[1]</sup> and *Z/E* ratios herein were determined by  $^1\text{H}$  NMR and

## 2. General Procedure and characterization data

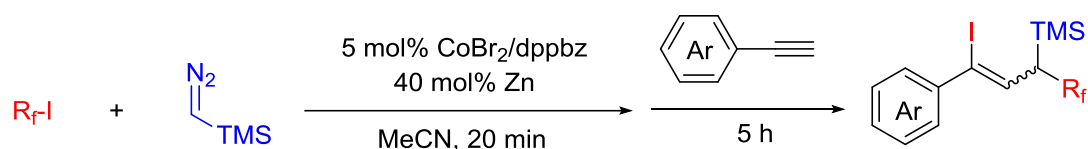

An oven-dried reaction tube was charged with  $\text{CoBr}_2$  (2.1 mg, 0.01 mmol, 0.05 equiv), dppbz (4.5 mg, 0.01 mmol, 0.05 equiv) and Zn (5.12 mg, 0.08 mmol, 0.40 equiv). The tube was evacuated and backfilled with nitrogen for three times. Acetonitrile (0.8 mL) was added into the tube and stirred for 1 minutes. Trimethylsilyldiazomethane (0.34 mmol, 2 M in hexane, 1.7 equiv) was added into the system, followed with  $\text{R}_f\text{-X}$  (0.26 mmol, 1.3 equiv). The mixture was stirred at room temperature for 20 minutes until nearly no bubble came out. Then the alkyne (0.2 mmol) was added into the system (Note: if it is solid, dissolve it in 0.1-0.2 mL dichloromethane) and reacted for another 5 hours. The solvent was removed to leave a crude product, which was purified by column chromatography on silica gel to afford the product **5**. (Note: In SI, the *Z/E* were determined by  $^1\text{H}$  NMR)

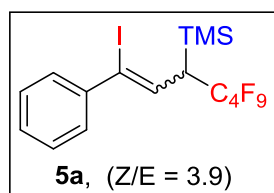

According to the general procedure, the product **5a** was purified with silica gel chromatography (Pe) as a pale yellow oil in 82% yield.  $^1\text{H}$  NMR (300 MHz,  $\text{CDCl}_3$ )  $\delta$  7.45-7.42 (m, 2H), 7.36-7.29 (m, 4.23H), 6.46 (d,  $J$  = 12.1 Hz, 0.25H), 5.83 (dd,  $J$  = 11.2, 1.7 Hz, 1H), 3.28 (dd,  $J$  = 35.7, 11.1 Hz, 1H), 2.88-2.70 (m, 0.25H), 0.30 (s, 9H), 0.15 (s, 2.25H).  $^{13}\text{C}$  NMR (75 MHz,  $\text{CDCl}_3$ )  $\delta$  143.2, 141.1 (minor), 133.5 (d,  $J$  = 12.0 Hz) (minor), 130.3 (d,  $J$  = 13.8 Hz), 128.6, 128.5, 128.48 (minor), 128.44 (minor), 128.36, 106.8, 43.8 (dd,  $J$  = 33.3, 25.0 Hz), 38.0 (dd,  $J$  = 31.7, 25.7 Hz) (minor), -0.89 (d,  $J$  = 1.6 Hz), -1.11 (d,  $J$  = 1.5 Hz) (minor);  $^{19}\text{F}$  NMR (564 MHz,  $\text{CDCl}_3$ )  $\delta$  -80.98 to -81.04 (m, 3F, *Z+E*), -101.1 to -102.1 (m, 1F, *Z+E*), -108.1

to -108.7 (m, 0.85F), -108.9 to -109.4 (m, *E*, 0.23F), -119.53 to -121.8 (m, 2F, *Z+E*), -124.6 to -125.4 (m, 1F, *Z+E*), -125.8 to -127.1 (m, 1F, *Z+E*); HRMS (EI) (*m/z*): [M-TMSF]<sup>+</sup> calcd for C<sub>13</sub>H<sub>7</sub>F<sub>8</sub>I: 441.9459, found: 441.9448.

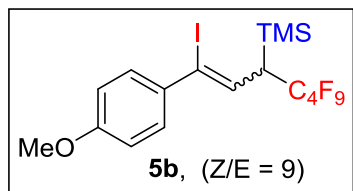

According to the general procedure, the product **5b** was purified with silica gel chromatography (Pe/EA = 50 : 1) as a pale yellow oil in 90% yield. <sup>1</sup>H NMR (300 MHz, CDCl<sub>3</sub>) δ 7.38 (d, *J* = 8.8 Hz, 2H), 7.24 (d, *J* = 8.7 Hz, 0.22H), 6.89-6.83 (m, 2.25H), 6.42 (d, *J* = 12.0 Hz, 0.11H), 5.73 (dd, *J* = 11.2, 1.1 Hz, 1H), 3.83 (s, 3.33H), 3.25 (dd, *J* = 35.7, 11.1 Hz, 1H), 2.88-2.70 (m, 0.25H), 0.29 (s, 9H), 0.15 (s, 1H); <sup>13</sup>C NMR (75 MHz, CDCl<sub>3</sub>) δ 159.9, 159.4 (minor), 135.9, 129.7, 128.8 (d, *J* = 13.8 Hz), 113.8 (minor), 113.6, 106.8, 55.4, 55.2 (minor), 43.7 (dd, *J* = 33.2, 25.0 Hz), -0.92 (d, *J* = 1.6 Hz), -1.14 (d, *J* = 1.5 Hz) (minor); <sup>19</sup>F NMR (564 MHz, CDCl<sub>3</sub>) δ -80.02 to -81.06 (m, 3F), -101.6 to -102.1 (m, 1F), -108.1 to -108.6 (m, 1F), -120.7 to -121.8 (m, 2F), -124.6 to -125.2 (m, 1F), -126.5 to -127.1 (m, 1F); HRMS (EI) (*m/z*): [M]<sup>+</sup> calcd for C<sub>17</sub>H<sub>18</sub>F<sub>9</sub>IOSi: 564.0022, found: 564.0019.

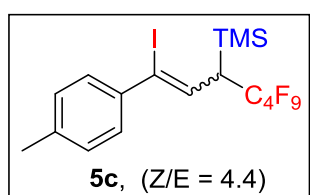

According to the general procedure, the product **5c** was purified with silica gel chromatography (Pe) as a pale yellow oil in 83% yield. <sup>1</sup>H NMR (300 MHz, CDCl<sub>3</sub>) δ 7.33 (d, *J* = 8.2 Hz, 2H), 7.20-7.17 (m, 0.86H), 7.13 (d, *J* = 8.0 Hz, 2H), 6.43 (d, *J* = 12.1 Hz, 0.22H), 5.79 (dd, *J* = 11.2, 1.3 Hz, 1H), 3.34-3.17 (m, 1H), 2.89-2.71 (m, 0.22H), 2.37 and 2.36 (s, overlap, 3.66 H), 0.29 (s, 9H), 0.15 (s, 1.98H); <sup>13</sup>C NMR (75 MHz, CDCl<sub>3</sub>) δ 140.5, 138.6, 138.4 (minor), 138.3 (minor), 129.5 (d, *J* = 13.7 Hz), 129.2 (minor), 129.0, 128.4, 128.3 (minor), 107.0, 43.7 (dd, *J* = 33.4, 25.0 Hz), 21.2, 21.1 (minor), -0.90 (d, *J* = 1.5 Hz), -1.11 (d, *J* = 1.5 Hz) (minor); <sup>19</sup>F NMR (564 MHz, CDCl<sub>3</sub>) δ -80.04 to -81.08 (m, 3F), -101.6 to -102.1 (m, 1F), -108.1 to -108.7 (m, 1F), -120.7 to -121.8 (m, 2F), -124.6 to -125.2 (m, 1F), -126.5 to -127.1 (m, 1F); HRMS (EI) (*m/z*): [M-TMSF]<sup>+</sup> calcd for C<sub>14</sub>H<sub>9</sub>F<sub>8</sub>I: 455.9616, found: 455.9609.

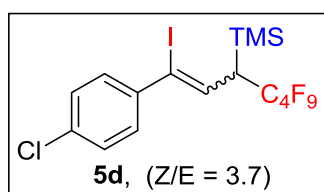

According to the general procedure, the product **5d** was purified with silica gel chromatography (Pe) as a colorless oil in 88% yield. <sup>1</sup>H NMR (300 MHz, CDCl<sub>3</sub>) δ 7.38-7.27 (m, 4.6H), 7.24-7.19 (m, 0.55H), 6.46 (d, *J* = 12.2 Hz, 0.27H), 5.81 (dd, *J* = 11.2, 1.4 Hz, 1H), 3.26 (dd, *J* = 35.5, 11.0 Hz, 1H), 2.76-2.59 (m, 0.24H), 0.29 (s, 9H), 0.14 (s, 2H); <sup>13</sup>C NMR (75 MHz, CDCl<sub>3</sub>) δ 141.6, 139.6 (minor), 134.5, 134.4 (minor), 131.0 (d, *J* = 13.6 Hz), 129.8 (minor), 129.7, 128.8 (minor), 128.5, 105.0, 93.4 (minor), 43.8 (dd, *J* = 33.6, 25.0 Hz), 38.2 (dd, *J* = 32.1, 25.4 Hz) (minor), -0.91 (d, *J* = 1.5 Hz), -1.15 (d, *J* = 1.5 Hz) (minor); <sup>19</sup>F NMR (564 MHz, CDCl<sub>3</sub>) δ -81.0 to -81.1 (m, 3F, *Z+E*), -101.2 to -102.3 (m, 1F, *Z+E*),

-108.2 to -109.4 (m, 1F, *Z+E*), -119.6 to -121.9 (m, 2F, *Z+E*), -124.4 to -125.4 (m, 1F, *Z+E*), -126.2 to -127.1 (m, 1F, *Z+E*); HRMS (EI) (*m/z*): [M-TMSF]<sup>+</sup> calcd for C<sub>13</sub>H<sub>6</sub>ClF<sub>8</sub>I: 475.9069, found: 475.9064.

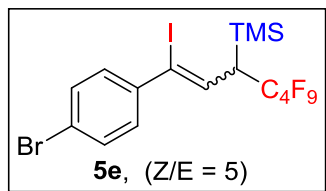

According to the general procedure, the product **5e** was purified with silica gel chromatography (Pe) as a pale yellow oil in 79% yield. <sup>1</sup>H NMR (300 MHz, CDCl<sub>3</sub>) δ 7.51-7.48 (m, 0.37H), 7.47-7.43 (m, 2H), 7.31-7.26 (m, 2H), 7.17-7.13 (m, 0.36H), 6.46 (d, *J* = 12.3 Hz, 0.18H), 5.81 (dd, *J* = 11.2, 1.4 Hz, 1H), 3.31-3.15 (m, 1H), 2.80-2.63 (m, 0.17H), 0.28 (s, 9H), 0.14 (s, 1.56H); <sup>13</sup>C NMR (75 MHz, CDCl<sub>3</sub>) δ 142.1, 140.1 (minor), 131.8 (minor), 131.5, 131.1 (d, *J* = 13.7 Hz), 130.0, 122.7, 122.6 (minor), 105.0, 93.4 (minor), 43.8 (dd, *J* = 33.6, 25.0 Hz), -0.89 (d, *J* = 1.6 Hz), -1.12 (d, *J* = 1.5 Hz) (minor); <sup>19</sup>F NMR (564 MHz, CDCl<sub>3</sub>) δ -80.02 to -81.05 (m, 3F), -101.7 to -102.2 (m, 1F), -108.1 to -108.7 (m, 1F), -120.7 to -121.9 (m, 2F), -124.6 to -125.2 (m, 1F), -126.5 to -127.1 (m, 1F); HRMS (EI) (*m/z*): [M-TMSF]<sup>+</sup> calcd for C<sub>13</sub>H<sub>6</sub>BrF<sub>8</sub>I: 519.8564, found: 519.8566.

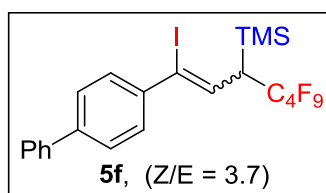

According to the general procedure, the product **5f** was purified with silica gel chromatography (Pe) as a pale yellow solid in 75% yield. <sup>1</sup>H NMR (300 MHz, CDCl<sub>3</sub>) δ 7.63-7.36 (m, 11.56), 6.50 (d, *J* = 12.2 Hz, 0.27H), 5.90 (dd, *J* = 11.2, 1.3 Hz, 1H), 3.31 (dd, *J* = 35.7, 11.1 Hz, 1H), 2.94-2.78 (m, 0.28H), 0.32 (s, 9H), 0.18 (s, 2.44H); <sup>13</sup>C NMR (75 MHz, CDCl<sub>3</sub>) δ 142.0, 141.5, 141.2 (minor), 140.3, 140.1 (minor), 140.0 (minor), 130.3 (d, *J* = 14.1 Hz), 129.0, 128.9, 127.7 (minor), 127.6, 127.1, 127.0, 106.5, 95.1 (minor), 43.5 (dd, *J* = 33.2, 24.9 Hz), -0.86 (d, *J* = 1.5 Hz), -1.06 (d, *J* = 1.5 Hz) (minor); <sup>19</sup>F NMR (564 MHz, CDCl<sub>3</sub>) δ -80.9 to -81.0 (m, 3F, *Z+E*), -101.0 to -102.1 (m, 1F, *Z+E*), -108.0 to -109.3 (m, 1F, *Z+E*), -119.4 to -121.8 (m, 2F, *Z+E*), -124.5 to -125.3 (m, 1F, *Z+E*), -126.1 to -127.0 (m, 1F, *Z+E*); HRMS (EI) (*m/z*): [M-TMSF]<sup>+</sup> calcd for C<sub>19</sub>H<sub>11</sub>F<sub>8</sub>I: 517.9772, found: 517.9776.

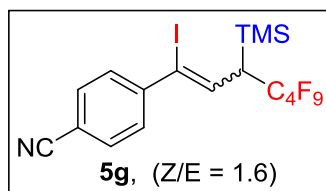

According to the general procedure, the product **5g** was purified with silica gel chromatography (Pe/EA = 5 : 1) as a pale yellow oil in 61% yield. <sup>1</sup>H NMR (300 MHz, CDCl<sub>3</sub>) δ 7.66 (d, *J* = 8.4 Hz, 1.32H), 7.61 (d, *J* = 8.5 Hz, 2H), 7.51 (d, *J* = 8.5 Hz, 2H), 7.37 (d, *J* = 8.4 Hz, 1.30H), 6.51 (d, *J* = 12.3 Hz, 0.64H), 5.93 (d, *J* = 11.1, 1H), 3.25 (dd, *J* = 35.1, 11.2 Hz, 1H), 2.72-2.55 (m, 0.68H), 0.28 (s, 9H), 0.14 (s, 5.94H); <sup>13</sup>C NMR (75 MHz, CDCl<sub>3</sub>) δ 147.1, 145.5 (minor), 135.3 (d, *J* = 11.1 Hz) (minor), 133.4 (d, *J* = 13.1 Hz), 132.3 (minor), 132.2, 129.2 (minor), 129.1, 118.3, 118.1 (minor), 112.3, 112.2 (minor), 103.6, 91.6 (minor), 44.0 (dd, *J* = 34.1, 25.3 Hz), 38.4 (dd, *J* = 32.7, 25.1 Hz), -0.88 (d, *J* = 1.6 Hz), -1.15 (d, *J*

= 1.5 Hz) (minor);  $^{19}\text{F}$  NMR (564 MHz,  $\text{CDCl}_3$ )  $\delta$  -81.0 to -81.1 (m, 3F, *Z+E*), -101.2 to -102.4 (m, 1F, *Z+E*), -108.3 to -109.5 (m, 1F, *Z+E*), -119.5 to -121.9 (m, 2F, *Z+E*), -124.6 to -125.4 (m, 1F, *Z+E*), -126.1 to -127.0 (m, 1F, *Z+E*); HRMS (EI) (*m/z*):  $[\text{M}]^+$  calcd for  $\text{C}_{17}\text{H}_{15}\text{F}_9\text{INSi}$ : 558.9869, found: 558.9858.

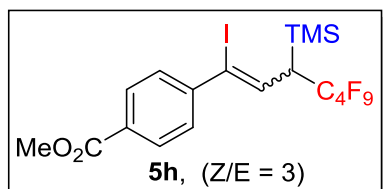

According to the general procedure, the product **5h** was purified with silica gel chromatography (Pe/EA = 30 : 1) as a colorless oil in 73% yield.  $^1\text{H}$  NMR (300 MHz,  $\text{CDCl}_3$ )  $\delta$  8.03 (d,  $J = 8.5$  Hz, 0.68H), 7.98 (d,  $J = 8.5$  Hz, 2H), 7.47 (d,  $J = 8.6$  Hz, 2H), 7.34 (d,  $J = 8.3$  Hz, 0.64H), 6.48 (d,  $J = 12.4$  Hz, 0.32H), 5.91 (dd,  $J = 11.2, 1.2$ , 1H), 3.94 and 3.92 (s, overlap, 4H), 3.26 (dd,  $J = 35.5, 11.1$  Hz, 1H), 2.79-2.61 (m, 0.33H), 0.28 (s, 9H), 0.12 (s, 2.93H);  $^{13}\text{C}$  NMR (75 MHz,  $\text{CDCl}_3$ )  $\delta$  166.4, 166.3 (minor), 147.1, 145.5 (minor), 134.5 (d,  $J = 11.5$  Hz) (minor), 132.2 (d,  $J = 13.4$  Hz), 130.0 (minor), 129.8 (minor), 129.7, 105.1, 93.3 (minor), 52.3 (minor), 52.2, 43.9 (dd,  $J = 33.6, 25.0$  Hz), 38.2 (dd,  $J = 32.1, 25.5$  Hz) (minor), -0.87 (d,  $J = 1.6$  Hz), -1.13 (d,  $J = 1.6$  Hz) (minor);  $^{19}\text{F}$  NMR (564 MHz,  $\text{CDCl}_3$ )  $\delta$  -81.0 to -81.1 (m, 3F, *Z+E*), -101.2 to -102.3 (m, 1F, *Z+E*), -108.2 to -109.5 (m, 1F, *Z+E*), -118.6 to -121.9 (m, 2F, *Z+E*), -124.6 to -125.2 (m, 1F, *Z+E*), -126.5 to -127.1 (m, 1F, *Z+E*); HRMS (EI) (*m/z*):  $[\text{M}]^+$  calcd for  $\text{C}_{18}\text{H}_{18}\text{F}_9\text{IO}_2\text{Si}$ : 591.9972, found: 591.9967.

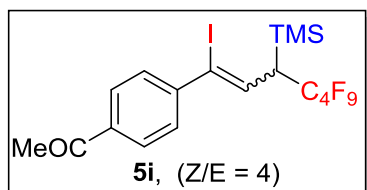

According to the general procedure, the product **5i** was purified with silica gel chromatography (Pe/EA = 30 : 1) as a colorless oil in 62% yield.  $^1\text{H}$  NMR (300 MHz,  $\text{CDCl}_3$ )  $\delta$  7.94 (d,  $J = 8.6$  Hz, 0.5H), 7.91 (d,  $J = 8.5$  Hz, 2H), 7.50 (d,  $J = 8.5$  Hz, 2H), 7.36 (d,  $J = 8.3$  Hz, 0.5H), 6.49 (d,  $J = 11.6$  Hz, 0.25H), 5.92 (dd,  $J = 11.2, 1.1$ , 1H), 3.27 (dd,  $J = 35.4, 11.2$  Hz, 1H), 2.61 (s, 0.75H), 2.60 (s, 3H), 0.28 (s, 9H), 0.13 (s, 2.21H);  $^{13}\text{C}$  NMR (75 MHz,  $\text{CDCl}_3$ )  $\delta$  197.2 (minor), 197.1, 147.2, 145.6 (minor), 136.8, 136.7 (minor), 132.3 (d,  $J = 13.5$  Hz), 128.7, 128.5 (minor), 128.4, 105.0, 44.0 (dd,  $J = 33.6, 25.0$  Hz), 26.7, 26.6 (minor), -0.87 (d,  $J = 1.6$  Hz), -1.13 (d,  $J = 1.5$  Hz) (minor);  $^{19}\text{F}$  NMR (564 MHz,  $\text{CDCl}_3$ ) -81.0 to -81.1 (m, 3F, *Z+E*), -101.2 to -102.3 (m, 1F, *Z+E*), -108.2 to -109.5 (m, 1F, *Z+E*), -119.5 to -121.9 (m, 2F, *Z+E*), -124.6 to -125.3 (m, 1F, *Z+E*), -126.2 to -127.0 (m, 1F, *Z+E*); HRMS (EI) (*m/z*):  $[\text{M}]^+$  calcd for  $\text{C}_{18}\text{H}_{18}\text{F}_9\text{IOSi}$ : 576.0022, found: 576.0040.

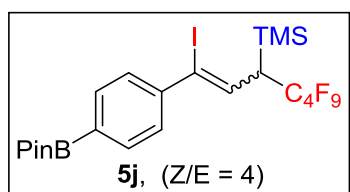

According to the general procedure, the product **5j** was purified with silica gel chromatography (Pe/EA = 30 : 1) as a colorless oil in 45% yield.  $^1\text{H}$  NMR (300 MHz,  $\text{CDCl}_3$ )  $\delta$  7.80-7.85 (overlap, m, 2.54H), 7.41 (d,  $J = 8.2$  Hz, 2H), 7.27 (d,  $J = 8.1$  Hz, 0.51H), 6.44 (d,  $J = 12.2$  Hz, 0.23H), 5.84 (dd,  $J = 11.2, 1.1$ , 1H), 3.26

(dd,  $J = 35.6, 11.2$  Hz, 1H), 2.84-2.66 (m, 0.24H), 1.35 (s, 14.80H), 0.27 (s, 9H), 0.13 (s, 2.09H);  $^{13}\text{C}$  NMR (75 MHz,  $\text{CDCl}_3$ )  $\delta$  145.6, 143.7 (minor), 134.8, 130.8 (d,  $J = 13.2$  Hz), 127.8, 127.7 (minor), 106.7, 95.1 (minor), 84.0 (minor), 83.9, 43.8 (dd,  $J = 33.4, 25.1$  Hz), 24.9 (minor), 24.8, -0.88 (d,  $J = 1.6$  Hz), -1.11 (d,  $J = 1.5$  Hz) (minor);  $^{19}\text{F}$  NMR (564 MHz,  $\text{CDCl}_3$ ) -80.98 to -81.03 (m, 3F,  $Z+E$ ), -101.2 to -102.2 (m, 1F,  $Z+E$ ), -108.1 to -109.5 (m, 1F,  $Z+E$ ), -119.6 to -121.8 (m, 2F,  $Z+E$ ), -124.6 to -125.4 (m, 1F,  $Z+E$ ), -126.2 to -127.1 (m, 1F,  $Z+E$ ); HRMS (EI) ( $m/z$ ):  $[\text{M}]^+$  calcd for  $\text{C}_{22}\text{H}_{27}\text{BF}_9\text{IO}_2\text{Si}$ : 660.0769, found: 660.0766.

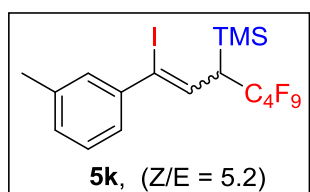

According to the general procedure, the product **5k** was purified with silica gel chromatography (Pe) as a colorless oil in 86% yield.  $^1\text{H}$  NMR (300 MHz,  $\text{CDCl}_3$ )  $\delta$  7.24-7.21 (m, 3.16H), 7.12-7.06 (m, 1.51H), 6.43 (d,  $J = 12.0$  Hz, 0.17H), 5.80 (dd,  $J = 11.2, 1.3$  Hz, 1H), 3.34-3.19 (m, 1H), 2.86-2.70 (m, 0.17H), 2.38 (s, 3H), 2.35 (s, 0.54H), 0.29 (s, 9H), 0.15 (s, 1.56H);  $^{13}\text{C}$  NMR (75 MHz,  $\text{CDCl}_3$ )  $\delta$  143.1, 141.0 (minor), 138.2 (minor), 138.1, 130.0 (d,  $J = 13.6$  Hz), 129.4, 129.2 (minor), 129.1, 128.9 (minor), 128.3 (minor), 128.2, 125.6, 125.4 (minor), 107.1, 43.7 (dd,  $J = 33.5, 24.9$  Hz), 21.33, 21.30 (minor), -0.87 (d,  $J = 1.6$  Hz), -1.09 (d,  $J = 1.6$  Hz) (minor);  $^{19}\text{F}$  NMR (564 MHz,  $\text{CDCl}_3$ )  $\delta$  -81.00 to -81.05 (m, 3F), -101.6 to -102.1 (m, 1F), -108.1 to -108.7 (m, 1F), -120.7 to -121.8 (m, 2F), -124.6 to -125.1 (m, 1F), -126.5 to -127.1 (m, 1F); HRMS (EI) ( $m/z$ ):  $[\text{M}-\text{TMSF}]^+$  calcd for  $\text{C}_{14}\text{H}_9\text{F}_8\text{I}$ : 455.9619, found: 455.9611.

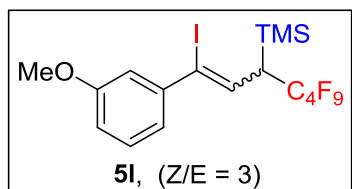

According to the general procedure, the product **5l** was purified with silica gel chromatography (Pe/EA = 50 : 1) as a colorless oil in 85% yield.  $^1\text{H}$  NMR (300 MHz,  $\text{CDCl}_3$ )  $\delta$  7.29-7.21 (m, 1.50H), 7.03-6.97 (m, 2H), 6.88-6.81 (m, 2H), 6.43 (d,  $J = 12.1$  Hz, 0.31H), 5.84 (dd,  $J = 11.2, 1.3$  Hz, 1H), 3.84 (s, 3H), 3.81 (s, 0.95H), 3.26 (dd,  $J = 35.7, 11.2$  Hz, 1H), 2.90-2.73 (m, 0.33H), 0.28 (s, 9H), 0.15 (s, 2.89H);  $^{13}\text{C}$  NMR (75 MHz,  $\text{CDCl}_3$ )  $\delta$  159.3, 144.5, 142.3 (minor), 133.5 (d,  $J = 11.5$  Hz) (minor), 130.5 (d,  $J = 13.5$  Hz), 129.5 (minor), 129.3, 120.8, 120.7 (minor), 114.7, 114.5 (minor), 113.7, 113.5 (minor), 106.4, 95.0 (minor), 55.3, 55.2 (minor), 43.7 (dd,  $J = 33.4, 24.9$  Hz), 38.0 (dd,  $J = 31.8, 25.5$  Hz) (minor), -0.89 (d,  $J = 1.5$  Hz), -1.09 (d,  $J = 1.4$  Hz) (minor);  $^{19}\text{F}$  NMR (564 MHz,  $\text{CDCl}_3$ )  $\delta$  -81.0 to -81.1 (m, 3F,  $Z+E$ ), -101.1 to -102.2 (m, 1F,  $Z+E$ ), -108.1 to -109.4 (m, 1F,  $Z+E$ ), -119.5 to -121.8 (m, 2F,  $Z+E$ ), -124.6 to -125.4 (m, 1F,  $Z+E$ ), -126.2 to -127.1 (m, 1F,  $Z+E$ ); HRMS (EI) ( $m/z$ ):  $[\text{M}]^+$  calcd for  $\text{C}_{17}\text{H}_{18}\text{F}_9\text{IOSi}$ : 564.0022, found: 564.0035.

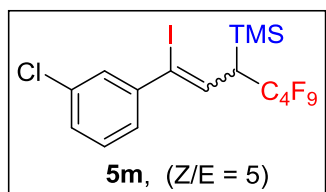

According to the general procedure, the product **5m** was purified with silica gel chromatography (Pe) as a colorless oil in 74% yield.  $^1\text{H}$  NMR (300 MHz,  $\text{CDCl}_3$ )  $\delta$  7.42 (s, 1H), 7.34-7.27 (m, 3.65H), 7.20-7.17 (m, 0.21H), 6.49 (d,  $J = 12.2$  Hz, 0.2H), 5.87 (dd,  $J = 11.2, 1.2$  Hz, 1H), 3.26 (dd,  $J = 35.5, 11.2$  Hz, 1H), 2.83-2.66 (m, 0.2H), 0.31 (s, 9H), 0.18 (s, 1.82H);  $^{13}\text{C}$  NMR (75 MHz,  $\text{CDCl}_3$ )  $\delta$  144.8, 142.7 (minor), 134.3 (minor), 134.2, 131.7 (d,  $J = 13.6$  Hz), 129.8 (minor), 129.6, 128.63 (minor), 128.6, 128.5, 126.7, 126.5 (minor), 104.4, 43.8 (dd,  $J = 33.7, 25.0$  Hz), -0.87 (d,  $J = 1.6$  Hz), -1.11 (d,  $J = 1.5$  Hz) (minor);  $^{19}\text{F}$  NMR (564 MHz,  $\text{CDCl}_3$ )  $\delta$  -80.99 to -81.04 (m, 3F, Z+E), -101.2 to -102.2 (m, 1F, Z+E), -108.2 to -109.5 (m, 1F, Z+E), -119.6 to -121.8 (m, 2F, Z+E), -124.6 to -125.3 (m, 1F, Z+E), -126.2 to -127.1 (m, 1F, Z+E); HRMS (EI) ( $m/z$ ):  $[\text{M-TMSF}]^+$  calcd for  $\text{C}_{13}\text{H}_6\text{ClF}_8\text{I}$ : 475.9069, found: 475.9071.

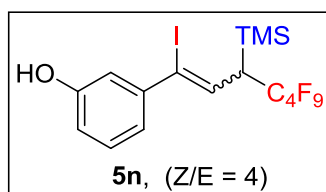

According to the general procedure, the product **5n** was purified with silica gel chromatography (Pe) as a pale yellow oil in 69% yield.  $^1\text{H}$  NMR (300 MHz,  $\text{CDCl}_3$ )  $\delta$  7.42 (s, 1H), 7.25-7.16 (m, 2.24H), 7.00 (d,  $J = 7.8$  Hz, 1H), 6.92-6.91 (m, 1H), 6.85 (d,  $J = 7.7$  Hz, 0.25H), 6.78-6.75 (m, 1.44H), 6.42 (d,  $J = 12.1$  Hz, 0.22H), 5.83 (dd,  $J = 11.2, 1.1$  Hz, 1H), 5.07 (s, 1.20H), 3.24 (dd,  $J = 35.6, 11.1$  Hz, 1H), 2.90-2.73 (m, 0.23H), 0.27 (s, 9H), 0.14 (s, 2.05);  $^{13}\text{C}$  NMR (75 MHz,  $\text{CDCl}_3$ )  $\delta$  155.3 (minor), 155.2, 144.7, 142.5 (minor), 133.7 (d,  $J = 11.1$  Hz) (minor), 130.6 (d,  $J = 13.8$  Hz), 129.8 (minor), 129.6, 121.1, 120.8 (minor), 115.7, 115.6 (minor), 115.6, 115.4 (minor), 105.9, 94.4 (minor), 43.7 (dd,  $J = 33.4, 25.0$  Hz), -0.91 (d,  $J = 1.5$  Hz), -1.10 (d,  $J = 1.5$  Hz) (minor);  $^{19}\text{F}$  NMR (564 MHz,  $\text{CDCl}_3$ )  $\delta$  -80.97 to -81.05 (m, 3F, Z+E), -101.1 to -102.2 (m, 1F, Z+E), -108.1 to -109.3 (m, 1F, Z+E), -119.6 to -121.8 (m, 2F, Z+E), -124.6 to -125.3 (m, 1F, Z+E), -126.1 to -127.1 (m, 1F, Z+E); HRMS (EI) ( $m/z$ ):  $[\text{M}]^+$  calcd for  $\text{C}_{16}\text{H}_{16}\text{F}_9\text{IOSi}$ : 549.9866, found: 549.9860.

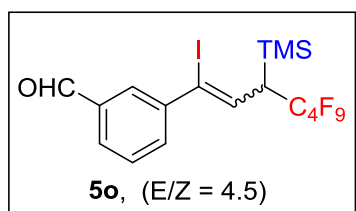

According to the general procedure, the product **5o** was purified with silica gel chromatography (Pe/EA = 30 : 1) as a colorless oil in 45% yield.  $^1\text{H}$  NMR (300 MHz,  $\text{CDCl}_3$ )  $\delta$  10.04 (s, 1H), 10.01 (s, 0.21), 7.90-7.89 (m, 1H), 7.82-7.77 (m, 1.44H), 7.69-7.65 (m, 1H), 7.55-7.47 (m, 1.45H), 6.51 (d,  $J = 12.2$  Hz, 0.22H), 5.90 (dd,  $J = 11.2, 1.3$  Hz, 1H), 3.32-3.15 (m, 1H), 2.80-2.63 (m, 0.27H), 0.28 (s, 9H), 0.14 (s, 2.44H);  $^{13}\text{C}$  NMR (75 MHz,  $\text{CDCl}_3$ )  $\delta$  191.6, 191.3 (minor), 144.1, 142.1 (minor), 136.6 (minor), 136.5, 134.1, 132.1 (d,  $J = 13.8$  Hz), 129.7, 129.5, 129.42 (minor), 129.39 (minor), 129.2, 104.5, 43.9 (dd,  $J = 33.7, 25.1$  Hz), 21.2, 21.1 (minor), -0.84 (d,  $J = 1.6$  Hz), -1.11 (d,  $J = 1.6$  Hz) (minor);  $^{19}\text{F}$  NMR (564 MHz,  $\text{CDCl}_3$ )  $\delta$  -80.99-81.02 (m, 3F), -101.7 to -102.3 (m, 1F), -108.1 to -108.7 (m,



1F), -120.7 to -121.8 (m, 2F), -124.6 to -125.1 (m, 1F), -126.4 to -127.3 (m, 1F); HRMS (EI) ( $m/z$ ):  $[M]^+$  calcd for  $C_{17}H_{16}F_9IOSi$ : 561.9866, found: 561.9853.

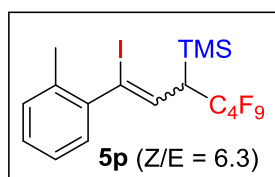

According to the general procedure, the product **5p** was purified with silica gel chromatography (Pe) as a pale yellow oil in 82% yield.  $^1H$  NMR (300 MHz,  $CDCl_3$ )  $\delta$  7.22-7.15 (m, 3H), 7.11-7.08 (m, 1H), 5.58 (dd,  $J = 11.1, 1.1$  Hz, 1H), 3.29-3.13 (m, 1H), 2.29 (s, 3H), 0.32 (s, 9H);  $^{13}C$  NMR (75 MHz,  $CDCl_3$ )  $\delta$  143.6, 135.5, 131.3 (d,  $J = 12.5$  Hz), 130.5, 126.7, 126.6, 125.8, 104.5, 42.8 (dd,  $J = 33.2, 25.2$  Hz), 19.8, -0.82 (d,  $J = 1.8$  Hz);  $^{19}F$  NMR (564 MHz,  $CDCl_3$ )  $\delta$  -81.00-81.05 (m, 3F), -101.2-101.6 (m, 1F), -107.9 to -108.5 (m, 1F), 121.1 (d,  $J = 7.9$  Hz, 2F), -124.5 to -125.1 (m, 1F), -126.4 to -127.0 (m, 1F); HRMS (EI) ( $m/z$ ):  $[M-TMSF]^+$  calcd for  $C_{14}H_9F_8I$ : 455.9619, found: 455.9612.

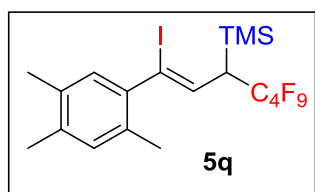

According to the general procedure, the product **5q** was purified with silica gel chromatography (Pe) as a pale yellow oil in 79% yield.  $^1H$  NMR (300 MHz,  $CDCl_3$ )  $\delta$  6.96 (s, 1H), 6.87 (s, 1H), 5.54 (dd,  $J = 11.1, 1.2$  Hz, 1H), 3.28-3.13 (m, 1H), 2.26 (s, 3H), 2.24 (s, 6H), 0.33 (s, 9H);  $^{13}C$  NMR (75 MHz,  $CDCl_3$ )  $\delta$  141.3, 137.2, 133.8, 132.6, 131.8, 130.9 (d,  $J = 13.2$  Hz), 129.7, 105.1, 42.8 (dd,  $J = 33.1, 25.0$  Hz), 19.7, 19.2, -0.83 (d,  $J = 1.8$  Hz);  $^{19}F$  NMR (564 MHz,  $CDCl_3$ )  $\delta$  -81.00-81.04 (m, 3F), -101.1 (d,  $J = 277.0$  Hz, 1F), -107.9 to -108.5 (m, 1F), -120.7 to -120.9 (m, 2F), -124.5 to -125.1 (m, 1F), -126.4 to -127.0 (m, 1F); HRMS (EI) ( $m/z$ ):  $[M]^+$  calcd for  $C_{19}H_{22}F_9ISi$ : 576.0386, found: 576.0376.

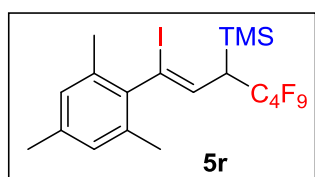

According to the general procedure, the product **5r** was purified with silica gel chromatography (Pe) as a colorless oil in 79% yield.  $^1H$  NMR (300 MHz,  $CDCl_3$ )  $\delta$  6.88 (s, 2H), 5.51 (d,  $J = 10.9$ , 1H), 3.28-3.10 (m, 1H), 3.32 (s, 3H), 2.28 (s, 3H), 2.21 (s, 3H), 0.33 (s, 9H);  $^{13}C$  NMR (75 MHz,  $CDCl_3$ )  $\delta$  139.8, 138.2, 136.1, 135.5, 131.0 (d,  $J = 12.7$  Hz), 128.8, 128.4, 105.3, 43.1 (dd,  $J = 32.1, 25.9$  Hz), 21.0, 20.8, 19.6 (dd,  $J = 3.6, 1.6$  Hz), -0.62 (d,  $J = 2.5$  Hz);  $^{19}F$  NMR (564 MHz,  $CDCl_3$ )  $\delta$  -81.00-81.05 (m, 3F), -100.1 (dd,  $J = 277.5, 15.9$  Hz, 1F), -106.7 to -107.3 (m, 1F), -120.3 to -120.9 (m, 1F), -121.2 to -121.7 (m, 1F), -124.4 to -125.0 (m, 1F), -126.7 to -127.3 (m, 1F); HRMS (EI) ( $m/z$ ):  $[M-I]^+$  calcd for  $C_{19}H_{22}F_9Si$ : 449.1342, found: 449.1330.

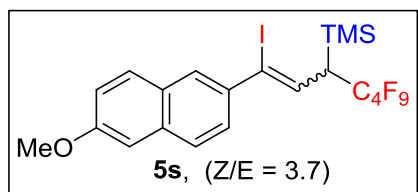

According to the general procedure, the product **5s** was purified with silica gel chromatography (Pe/EA = 30 : 1) as a pale yellow oil in 76% yield. <sup>1</sup>H NMR (300 MHz, CDCl<sub>3</sub>) δ 7.81-7.67 (m, 4H), 7.54 (dd, *J* = 8.6, 1.9 Hz, 1H), 7.37 (dd, *J* = 8.6, 1.7 Hz, 0.30H), 7.21-7.17 (m, 1.36H), 7.14-7.13 (m, 1.37H), 6.53 (d, *J* = 12.0 Hz, 0.28H), 5.92 (dd, *J* = 11.2, 1.2 Hz, 1H), 3.94 (s, 3.91H), 3.34 (dd, *J* = 35.7, 11.2 Hz, 1H), 2.97-2.79 (m, 0.28H), 0.33 (s, 9H), 0.16 (s, 2.56H); <sup>13</sup>C NMR (75 MHz, CDCl<sub>3</sub>) δ 158.5 (minor), 158.3, 138.3, 136.1 (minor), 134.5, 134.2 (minor), 129.9 (d, *J* = 13.5 Hz), 129.7, 129.66 (minor), 129.2 (d, *J* = 11.8 Hz) (minor), 128.3, 128.1 (minor), 127.6, 127.12 (minor), 127.1 (minor), 126.8, 126.6, 119.6 (minor), 119.5, 107.4, 105.7 (minor), 105.6, 96.1 (minor), 55.34 (minor), 55.29, 43.8 (dd, *J* = 33.4, 25.0 Hz), -0.85 (d, *J* = 1.6 Hz), -0.11 (d, *J* = 1.6 Hz) (minor); <sup>19</sup>F NMR (564 MHz, CDCl<sub>3</sub>) δ -80.9 to -81.0 (m, 3F, Z+E), -101.0 to -102.1 (m, 1F, Z+E), -108.0 to -109.2 (m, 1F, Z+E), -119.4 to -121.7 (m, 2F, Z+E), -124.5 to -125.3 (m, 1F, Z+E), -126.1 to -127.1 (m, 1F, Z+E); HRMS (EI) (*m/z*): [M]<sup>+</sup> calcd for C<sub>21</sub>H<sub>20</sub>F<sub>9</sub>IOSi: 614.0179, found: 614.0177.

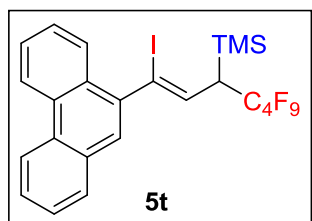

According to the general procedure, the product **5t** was purified with silica gel chromatography (Pe/EA = 30 : 1) as a pale yellow oil in 71% yield. <sup>1</sup>H NMR (300 MHz, CDCl<sub>3</sub>) δ 8.76-8.73 (m, 1H), 8.68 (d, *J* = 8.2 Hz, 1H), 8.15-8.11 (m, 1H), 7.93-7.90 (m, 1H), 7.72-7.60 (m, 5H), 5.92 (dd, *J* = 11.1, 1.1 Hz, 1H), 3.52-3.36 (m, 1H), 0.42 (s, 9H); <sup>13</sup>C NMR (75 MHz, CDCl<sub>3</sub>) δ 140.1, 132.7 (d, *J* = 13.5 Hz), 131.1, 130.7, 130.4, 129.5, 128.9, 127.3, 127.2, 127.0, 126.6, 126.5, 126.4, 122.9, 122.6, 103.1, 42.9 (dd, *J* = 33.3, 25.3 Hz), -0.69 (d, *J* = 1.7 Hz); <sup>19</sup>F NMR (564 MHz, CDCl<sub>3</sub>) δ -80.9 (s, 3F), -101.4 (dd, *J* = 276.6, 15.9 Hz, 1F), -107.8 to -108.2 (m, 1F), -120.8 (s, 2F), -124.4 to -125.0 (m, 1F), -126.2 to -126.8 (m, 1F); HRMS (EI) (*m/z*): [M]<sup>+</sup> calcd for C<sub>24</sub>H<sub>20</sub>F<sub>9</sub>ISi: 634.0230, found: 634.0241.

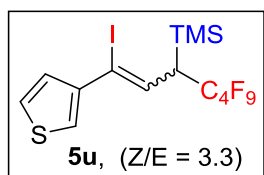

According to the general procedure, the product **5u** was purified with silica gel chromatography (Pe) as a pale yellow oil in 82% yield. <sup>1</sup>H NMR (300 MHz, CDCl<sub>3</sub>) δ 7.36-7.32 (m, 2.27H), 7.24-7.22 (m, 1.29H), 7.07 (dd, *J* = 5.0, 1.1 Hz, 0.31H), 6.42 (dd, *J* = 12.0 Hz, 0.30H), 5.95 (dd, *J* = 11.2, 1.2 Hz, 1H), 3.32-3.16 (m, 1H), 3.03-2.86 (m, 0.31H), 0.27 (s, 9H), 0.14 (s, 2.78H); <sup>13</sup>C NMR (75 MHz, CDCl<sub>3</sub>) δ 143.7, 141.1 (minor), 134.3 (d, *J* = 11.2 Hz) (minor), 128.5 (d, *J* = 14.4 Hz), 128.4 (minor), 126.2, 126.0, 125.9 (minor), 125.4, 123.6 (minor), 99.6, 43.3 (dd, *J* = 33.5, 25.1 Hz), -0.91 (d, *J* = 1.7 Hz), -1.29 (d, *J* = 1.6 Hz); <sup>19</sup>F NMR (564 MHz, CDCl<sub>3</sub>) δ -80.99 to -81.06 (m, 3F, Z+E), -101.2 to -102.1 (m, 1F, Z+E), -108.1 to -109.6 (m, 1F, Z+E), -119.6 to -121.8 (m, 2F, Z+E), -124.6 to -125.4 (m, 1F, Z+E), -126.2 to -127.1 (m, 1F, Z+E); HRMS (EI) (*m/z*): [M-TMSF]<sup>+</sup> calcd for C<sub>11</sub>H<sub>5</sub>F<sub>8</sub>IS: 447.9023, found: 447.9013.

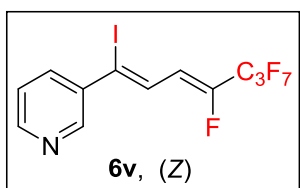

According to the general procedure, the product **6v** (*Z*) was purified with silica gel chromatography (Pe/EA = 5 : 1) as a pale yellow oil. <sup>1</sup>H NMR (300 MHz, CDCl<sub>3</sub>) δ 8.79 (s, 1H), 8.56 (s, 1H), 7.84 (d, *J* = 8.0, 1H), 7.33-7.28 (m, 1H), 6.92 (d, *J* = 10.5, 1H), 6.51 (dd, *J* = 31.1, 10.5 Hz, 1H); <sup>13</sup>C NMR (75 MHz, CDCl<sub>3</sub>) δ 150.5, 148.8, 138.0, 136.6, 125.6, 123.2, 117.4 (d, *J* = 4.3 Hz), 109.1; <sup>19</sup>F NMR (564 MHz, CDCl<sub>3</sub>) δ -80.7 (t, *J* = 8.7 Hz, 3F), 118.8 (td, *J* = 16.5, 8.2 Hz, 2F), -125.5 to -125.6 (m, 1F), -127.1 (d, *J* = 7.8 Hz, 2F); HRMS (EI) (*m/z*): [M]<sup>+</sup> calcd for C<sub>12</sub>H<sub>6</sub>F<sub>8</sub>I: 442.9412, found: 442.9402.

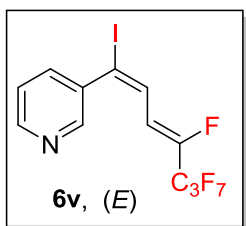

According to the general procedure, the product **6v** (*E*) was purified with silica gel chromatography (Pe/EA = 5 : 1) as a pale yellow oil. <sup>1</sup>H NMR (300 MHz, CDCl<sub>3</sub>) δ 8.60-8.56 (m, 2H), 7.67-7.64 (m, 1H), 7.45 (d, *J* = 11.5, 1H), 7.38-7.33 (m, 1H), 5.94 (dd, *J* = 30.3, 11.5 Hz, 1H); <sup>13</sup>C NMR (75 MHz, CDCl<sub>3</sub>) δ 150.4, 148.9, 136.7, 131.4 (d, *J* = 3.4 Hz), 123.4, 110.5 (d, *J* = 5.4 Hz); <sup>19</sup>F NMR (564 MHz, CDCl<sub>3</sub>) δ -80.7 (t, *J* = 8.4 Hz, 3F), 118.6 (td, *J* = 16.4, 8.6 Hz, 2F), -121.4 to -121.5 (m, 1F), -127.1 (d, *J* = 7.8 Hz, 2F); HRMS (EI) (*m/z*): [M]<sup>+</sup> calcd for C<sub>12</sub>H<sub>6</sub>F<sub>8</sub>I: 442.9412, found: 442.9408.

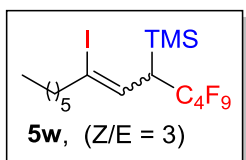

According to the general procedure using 0.8 equiv zinc and run the reaction at 60 °C after addition of alkyne, the product **5w** was purified with silica gel chromatography (Pe) as a pale yellow oil in 31% yield. <sup>1</sup>H NMR (300 MHz, CDCl<sub>3</sub>) δ 6.11 (d, *J* = 12.0 Hz, 0.30H), 5.95 (dd, *J* = 11.0, 0.9 Hz, 1H), 3.12-2.94 (m, 1H), 2.93-2.75 (m, 0.39H), 2.52 (t, *J* = 7.3 Hz, 2H), 2.31-2.21 (m, 0.69H), 1.58-1.46 (m, 3.37H, overlap with H<sub>2</sub>O), 1.30-1.26 (m, 7.96H), 0.91-0.86 (m, 4.08H), 0.20 (s) with 0.18 (s) (12.41H); <sup>13</sup>C NMR (75 MHz, CDCl<sub>3</sub>) δ 126.3 (d, *J* = 13.3 Hz), 112.6, 45.5, 42.1 (dd, *J* = 32.8, 24.9 Hz), 38.3 (minor), 31.6 (minor), 31.5, 29.6 (minor), 29.5, 28.4 (minor), 27.9, 22.6, 22.5 (minor), 13.96, 13.93 (minor), -1.03 (d, *J* = 1.7 Hz), -1.42 (d, *J* = 1.6 Hz, minor); <sup>19</sup>F NMR (564 MHz, CDCl<sub>3</sub>) δ -81.0 to -81.1 (m, 3F, *Z+E*), -100.9 to -101.8 (m, 1F, *Z+E*), -108.1 to -108.7 (m, 0.83F, *Z*), -109.6 to -110.2 (m, 0.24F, *E*), -120.2 to -121.1 (m, 2F, *Z+E*), -124.4 to -125.1 (m, 1F, *Z+E*), -126.6 to -127.2 (m, 1F, *Z+E*); HRMS (EI) (*m/z*): [M-TMSF]<sup>+</sup> calcd for C<sub>13</sub>H<sub>15</sub>F<sub>8</sub>I: 450.0085, found: 450.0071.

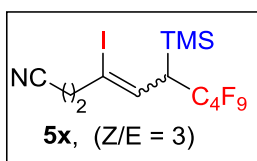

According to the general procedure using 0.8 equiv zinc and run the reaction at 60 °C after addition of alkyne, the product **5x** was purified with silica gel chromatography (Pe/EA = 10 : 1) as a pale yellow oil in 20% yield. <sup>1</sup>H NMR (300 MHz, CDCl<sub>3</sub>) δ 6.24 (d, *J* = 12.2 Hz, 0.32H),

5.95 (dd,  $J = 11.0, 0.9$  Hz, 1H), 3.12-2.94 (m, 1H), 2.93-2.78 (m, 0.44H), 2.70 (t,  $J = 7.0$  Hz, 2H), 2.56-2.44 (m, 0.55H), 2.39-2.69 (m, 2.76H), 1.99-1.85 (m, 2.76H), 0.21 (d,  $J = 0.54$  Hz, 9H) with 0.19 (d,  $J = 0.54$  Hz, 2.8H);  $^{13}\text{C}$  NMR (75 MHz,  $\text{CDCl}_3$ )  $\delta$  129.3 (d,  $J = 13.3$  Hz), 118.9, 108.4, 43.6, 42.2 (dd,  $J = 33.1, 24.9$  Hz), 36.6 (minor), 25.6 (minor), 25.0, 16.1 (minor), 15.5, -1.03 (d,  $J = 1.7$  Hz), -1.46 (d,  $J = 1.6$  Hz, minor);  $^{19}\text{F}$  NMR (564 MHz,  $\text{CDCl}_3$ )  $\delta$  -80.97 to -81.03 (m, 3F,  $Z+E$ ), -101.1 to -101.9 (m, 1F,  $Z+E$ ), -108.1 to -108.7 (m, 0.78F,  $Z$ ), -109.5 to -110.3 (m, 0.23F,  $E$ ), -120.0 to -121.1 (m, 2F,  $Z+E$ ), -124.6 to -125.2 (m, 1F,  $Z+E$ ), -126.5 to -127.1 (m, 1F,  $Z+E$ ); HRMS (EI) ( $m/z$ ):  $[\text{M-TMSF}]^+$  calcd for  $\text{C}_{11}\text{H}_8\text{F}_8\text{IN}$ : 432.9568, found: 432.9560.

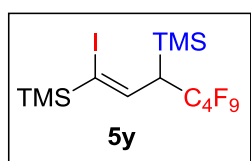

According to the general procedure using 0.8 equiv zinc and run the reaction at 60 °C after addition of alkyne, the product **5x** was purified with silica gel chromatography (Pe) as a pale yellow oil in 39% yield.  $^1\text{H}$  NMR (300 MHz,  $\text{CDCl}_3$ )  $\delta$  6.02 (dd,  $J = 10.7, 1.7$  Hz, 1H), 3.44-3.26 (m, 1H), 0.21 (s, 9H), 0.19 (s, 9H);  $^{13}\text{C}$  NMR (75 MHz,  $\text{CDCl}_3$ )  $\delta$  138.2 (d,  $J = 12.6$  Hz), 115.7, 44.9 (dd,  $J = 32.2, 24.4$  Hz), -1.01 (d,  $J = 1.4$  Hz), -1.47;  $^{19}\text{F}$  NMR (564 MHz,  $\text{CDCl}_3$ )  $\delta$  -81.0 to -81.1 (m, 3F), -101.5 to -102.1 (m, 1F), -108.2 to -108.8 (m, 1F), -121.4 to -121.5 (m, 2F), -124.6 to -125.2 (m, 1F), -126.5 to -127.1 (m, 1F); HRMS (EI) ( $m/z$ ):  $[\text{M-TMSF}]^+$  calcd for  $\text{C}_{10}\text{H}_{11}\text{F}_8\text{ISi}$ : 437.9541, found: 437.9552.

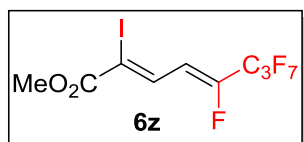

According to the general procedure using 0.8 equiv zinc and run the reaction at 60 °C after addition of alkyne, the product **5x** was purified with silica gel chromatography (Pe/EA = 40 : 1) as a colorless oil in 24% yield.  $^1\text{H}$  NMR (300 MHz,  $\text{CDCl}_3$ )  $\delta$  7.92 (dd,  $J = 11.0, 0.8$  Hz, 1H), 6.49 (dd,  $J = 30.5, 11.0$  Hz, 1H);  $^{13}\text{C}$  NMR (75 MHz,  $\text{CDCl}_3$ )  $\delta$  138.2 (d,  $J = 12.6$  Hz), 115.7, 44.9 (dd,  $J = 32.2, 24.4$  Hz), -1.01 (d,  $J = 1.4$  Hz), -1.47;  $^{19}\text{F}$  NMR (564 MHz,  $\text{CDCl}_3$ )  $\delta$  -80.6 (t,  $J = 9.0$  Hz, 3F), -114.8 (m, 1F), -118.9 (dq,  $J = 17.2, 8.5$  Hz, 2F), -126.95 to -126.97 (m, 2F); HRMS (EI) ( $m/z$ ):  $[\text{M}]^+$  calcd for  $\text{C}_9\text{H}_5\text{F}_8\text{IO}_2$ : 423.9201, found: 423.9209.

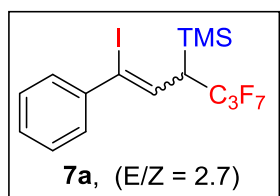

According to the general procedure, the product **7a** was purified with silica gel chromatography (Pe) as a pale yellow oil in 44% yield.  $^1\text{H}$  NMR (300 MHz,  $\text{CDCl}_3$ )  $\delta$  7.44-7.41 (m, 2H), 7.36-7.28 (m, 4.90H), 6.45 (d,  $J = 12.1$  Hz, 0.37H), 5.81 (dd,  $J = 11.2, 1.1$  Hz, 1H), 3.33-3.16 (m, 1H), 2.84-2.67 (m, 0.39H), 0.28 (s, 9H), 0.14 (s, 3.39H).  $^{13}\text{C}$  NMR (75 MHz,  $\text{CDCl}_3$ )  $\delta$  143.2, 141.1 (minor), 133.5 (d,  $J = 9.6$  Hz) (minor), 130.4 (d,  $J = 13.8$  Hz), 128.54, 128.50, 128.48 (minor), 128.42 (minor), 128.3, 106.8, 95.4 (minor), 43.5 (dd,  $J = 33.5, 25.4$  Hz), 37.4 (dd,  $J = 32.0, 26.1$  Hz) (minor), -0.91 (d,  $J = 1.5$  Hz), -1.11 (d,  $J = 1.6$  Hz) (minor);  $^{19}\text{F}$  NMR (564 MHz,  $\text{CDCl}_3$ )  $\delta$  -80.26 (dd,  $J = 12.7, 10.4$  Hz, 1F,  $E$ ), -80.31 (dd,  $J = 12.7, 9.2$  Hz, 3F,

Z), -101.4 to -102.5 (m, 1.37F, Z+E), -109.0 to -109.6 (m, 1F, Z), -109.6 to -110.2 (m, 0.4F, E), -122.8 to -123.3 (m, 0.4F, E), -124.0 to -124.6 (m, 1F, Z), -124.7 to -125.3 (m, 1.33F, Z+E); HRMS (EI) ( $m/z$ ): [M-TMSF]<sup>+</sup> calcd for C<sub>12</sub>H<sub>7</sub>F<sub>6</sub>I: 391.9491, found: 391.9485.

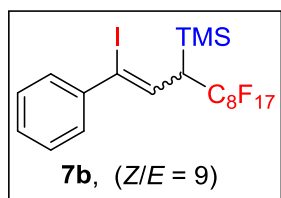

According to the general procedure, the product **7b** was purified with silica gel chromatography (Pe) as a pale yellow oil in 73% yield. <sup>1</sup>H NMR (300 MHz, CDCl<sub>3</sub>) δ 7.45-7.42 (m, 2H), 7.36-7.28 (m, 3.55H), 6.46 (d,  $J$  = 12.0 Hz, 0.11H), 5.83 (d,  $J$  = 11.1 Hz, 1H), 3.36-3.19 (m, 1H), 2.87-2.71 (m, 0.12H), 0.29 (s, 9H), 0.15 (s, 1H). <sup>13</sup>C NMR (75 MHz, CDCl<sub>3</sub>) δ 143.2, 141.1 (minor), 130.4 (d,  $J$  = 13.7 Hz), 128.6 (minor), 128.5, 128.48 (minor), 128.44 (minor), 128.36, 106.8, 43.8 (dd,  $J$  = 33.5, 24.8 Hz), -0.91 (d,  $J$  = 1.6 Hz), -1.14 (d,  $J$  = 1.5 Hz) (minor); <sup>19</sup>F NMR (564 MHz, CDCl<sub>3</sub>) δ -80.88 to -80.90 (m, 3F), -101.6 to -102.1 (m, 1F), -107.8 to -108.3 (m, 1F), -109.5 to -123.4 (m, 10F), -125.5 to -126.8 (m, 2F, Z); HRMS (EI) ( $m/z$ ): [M-TMSF]<sup>+</sup> calcd for C<sub>17</sub>H<sub>7</sub>F<sub>16</sub>I: 641.9331, found: 641.9345.

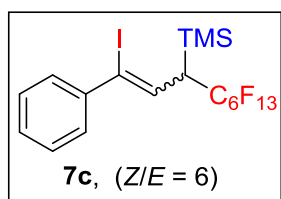

According to the general procedure, the product **7c** was purified with silica gel chromatography (Pe) as a pale yellow oil in 74% yield. <sup>1</sup>H NMR (300 MHz, CDCl<sub>3</sub>) δ 7.45-7.42 (m, 2H), 7.36-7.29 (m, 3.95H), 6.46 (d,  $J$  = 12.1 Hz, 0.19H), 5.83 (d,  $J$  = 11.1 Hz, 1H), 3.27 (ddt,  $J$  = 35.4, 11.2, 2.5 Hz, 1H), 2.87-2.60 (m, 0.20H), 0.29 (s, 9H), 0.14 (s, 1.78H). <sup>13</sup>C NMR (75 MHz, CDCl<sub>3</sub>) δ 143.2, 141.1 (minor), 130.4 (d,  $J$  = 13.5 Hz), 128.6, 128.5, 128.47 (minor), 128.44 (minor), 128.4, 106.8, 43.9 (dd,  $J$  = 33.3, 25.0 Hz), 37.4 (dd,  $J$  = 32.0, 26.1 Hz) (minor), -0.89 (d,  $J$  = 1.6 Hz), -1.11 (d,  $J$  = 1.6 Hz) (minor); <sup>19</sup>F NMR (564 MHz, CDCl<sub>3</sub>) δ -80.9 (t,  $J$  = 9.5 Hz, 3F), -101.5 to -102.1 (m, 1F), -107.8 to -108.4 (m, 1F), -109.5 to -123.6 (m, 6F), -125.8 to -127.0 (m, 2F); HRMS (EI) ( $m/z$ ): [M-TMSF]<sup>+</sup> calcd for C<sub>15</sub>H<sub>7</sub>F<sub>12</sub>I: 541.9395, found: 541.9396.

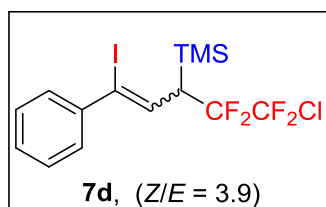

According to the general procedure, the product **7d** was purified with silica gel chromatography (Pe/EA = 10 : 1) as a pale yellow oil in 55% yield. <sup>1</sup>H NMR (300 MHz, CDCl<sub>3</sub>) δ 7.44-7.40 (m, 2H), 7.35-7.27 (m, 4.49H), 6.44 (d,  $J$  = 12.4 Hz, 0.26H), 5.80 (dd,  $J$  = 11.4, 1.0 Hz, 1H), 3.32-3.16 (m, 1H), 2.80-2.64 (m, 0.26H), 1.42-1.34 (m, overlap, 3.87H), 0.28 (s, 9H), 0.14 (s, 2.42H); <sup>13</sup>C NMR (75 MHz, CDCl<sub>3</sub>) δ 143.2, 141.1 (minor), 130.4 (d,  $J$  = 13.7 Hz), 128.6 (minor), 128.5, 128.48 (minor), 128.44 (minor), 128.36, 106.8, 43.8 (dd,  $J$  = 33.5, 24.8 Hz), -0.91 (d,  $J$  = 1.6 Hz), -1.12 (d,  $J$  = 1.5 Hz) (minor); <sup>19</sup>F NMR (564 MHz, CDCl<sub>3</sub>) δ -66.9 (dd,  $J$  = 174.2, 9.5 Hz, 0.26F, E), -68.1 to -68.4 (m, 0.26F, E), -68.3 (d,  $J$  = 173.7 Hz, 1F, Z), -68.7 (dd,  $J$  = 174.1, 9.3 Hz, 1F, Z), -98.9 (d,  $J$  = 265.1 Hz, 0.26F, E), -99.7 (d,  $J$

= 263.2 Hz, 1F, Z), -109.8 to -110.4 (m, 0.26F, E), 110.3 (ddd,  $J = 262.9, 34.7, 9.4$  Hz, 1F, Z); HRMS (EI) ( $m/z$ ):  $[M-TMSF]^+$  calcd for  $C_{11}H_7ClF_3I$ : 357.9228, found: 357.9224.

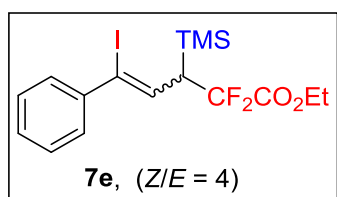

According to the general procedure, the product **7e** was purified with silica gel chromatography (Pe/EA = 10 : 1) as a pale yellow oil in 76% yield.  $^1H$  NMR (300 MHz,  $CDCl_3$ )  $\delta$  7.44-7.41 (m, 2H), 7.36-7.28 (m, 4.26H), 6.46 (d,  $J = 12.4$  Hz, 0.25H), 5.79 (dd,  $J = 11.4, 1.0$  Hz, 1H), 4.40-4.27 (m, overlap, 2.46H), 3.15 (ddd,  $J = 31.4, 11.4, 7.8$  Hz, 1H), 2.74 (dt,  $J = 25.6, 12.4$  Hz, 0.26H), 1.42-1.34 (m, overlap, 3.87H), 0.27 (s, 9H), 0.08 (s, 2.30H);  $^{13}C$  NMR (75 MHz,  $CDCl_3$ )  $\delta$  164.2 (dd,  $J = 36.6, 33.8$  Hz), 143.0, 141.0 (minor), 134.5 (dd,  $J = 8.9, 3.4$  Hz), 131.5 (dd,  $J = 12.2, 1.4$  Hz), 128.61 (minor), 128.57, 128.54, 128.41 (minor), 128.34 (minor), 128.29, 117.6 (t,  $J = 251.9$  Hz), 108.0, 96.7 (minor), 62.9, 46.3 (dd,  $J = 31.7, 26.5$  Hz), 40.7 (dd,  $J = 29.5, 25.9$  Hz) (minor), 14.1, 14.0 (minor), -1.07, -1.61 (minor);  $^{19}F$  NMR (564 MHz,  $CDCl_3$ )  $\delta$  -97.7 (dd,  $J = 250.6, 7.8$  Hz, 1F, Z), -103.3 (dd,  $J = 251.5, 13.0$  Hz, 0.25F, E), -101.0 (dd,  $J = 251.6, 25.6$  Hz, 0.26F, E), -98.0 (dd,  $J = 250.6, 31.3$  Hz, 1F, Z); HRMS (EI) ( $m/z$ ):  $[M]^+$  calcd for  $C_{16}H_{21}F_2IO_2Si$ : 438.0318, found: 438.0322.

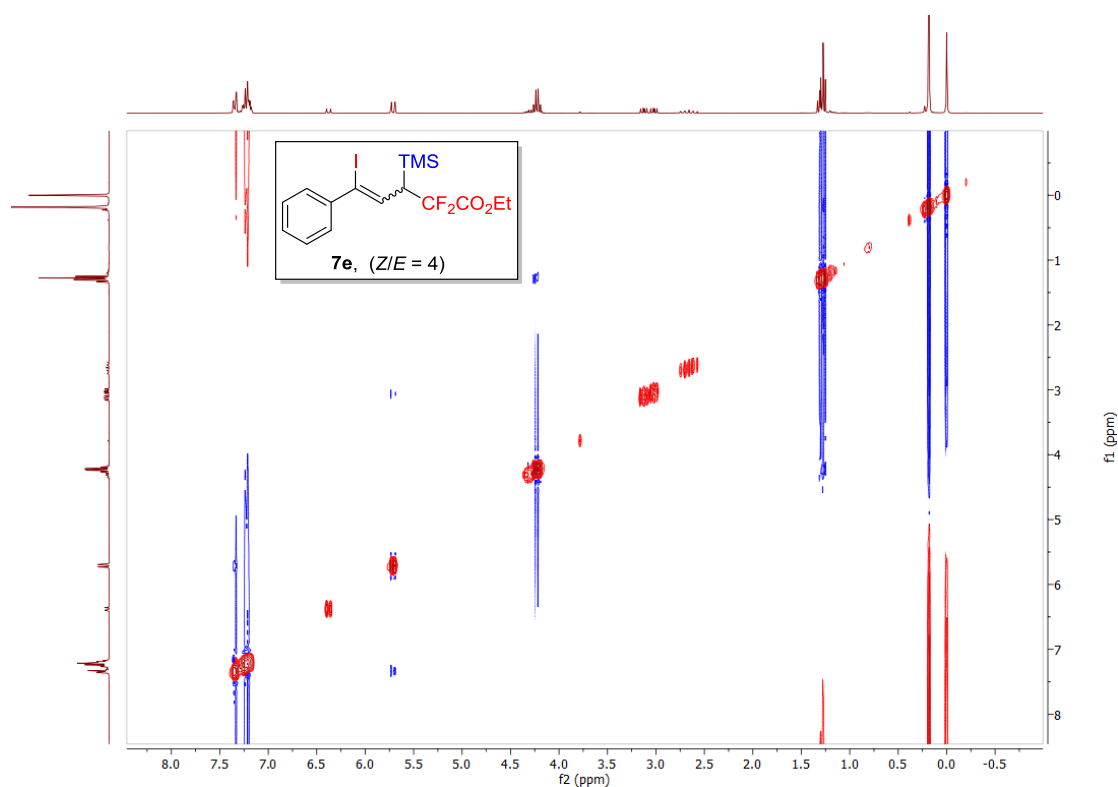

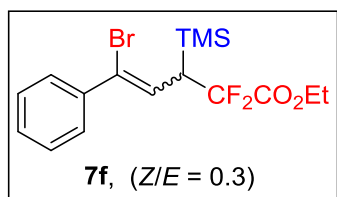

According to the general procedure, the product **7f** was purified with silica gel chromatography (Pe/EA = 10 : 1) as a pale yellow oil in 43% yield.  $^1\text{H}$  NMR (300 MHz,  $\text{CDCl}_3$ )  $\delta$  7.50-7.47 (m, 0.59H), 7.39-7.31 (m, 5.97H), 6.17 (d,  $J$  = 12.6 Hz, 1H), 6.11 (dd,  $J$  = 11.5, 1.1 Hz, 0.28H), 4.39-4.24 (m, overlap, 2.66H), 3.30 (ddd,  $J$  = 31.3, 11.5, 8.3 Hz, 0.3H), 2.76 (dt,  $J$  = 25.7, 12.9 Hz, 1H), 1.38-1.28 (m, overlap, 4.08H), 0.23 (s, 2.43), 0.06 (s, 9H);  $^{13}\text{C}$  NMR (75 MHz,  $\text{CDCl}_3$ )  $\delta$  164.4 (t,  $J$  = 34.5 Hz), 139.7 (minor), 138.0 (minor), 128.9, 128.8, 128.5, 128.4 (minor), 127.6 (minor), 126.1 (dd,  $J$  = 9.2, 3.4 Hz), 124.2 (dd,  $J$  = 12.1, 1.5 Hz) (minor), 122.4 (d,  $J$  = 1.5), 117.2 (t,  $J$  = 251.9 Hz), 62.9, 41.5 (dd,  $J$  = 31.7, 26.8 Hz) (minor), 39.0 (dd,  $J$  = 29.7, 26.1 Hz), 14.0, -1.26 (minor), -1.63;  $^{19}\text{F}$  NMR (564 MHz,  $\text{CDCl}_3$ )  $\delta$  -96.7 to -98.1 (m, 1.26F, *Z+E*), -101.2 (dd,  $J$  = 252.1, 25.7 Hz, 1F, *E*), -103.6 (dd,  $J$  = 250.9, 31.4 Hz, 0.26F, *Z*); HRMS (EI) ( $m/z$ ):  $[\text{M}]^+$  calcd for  $\text{C}_{16}\text{H}_{21}\text{F}_2\text{BrO}_2\text{Si}$ : 390.0457, found: 390.0463.

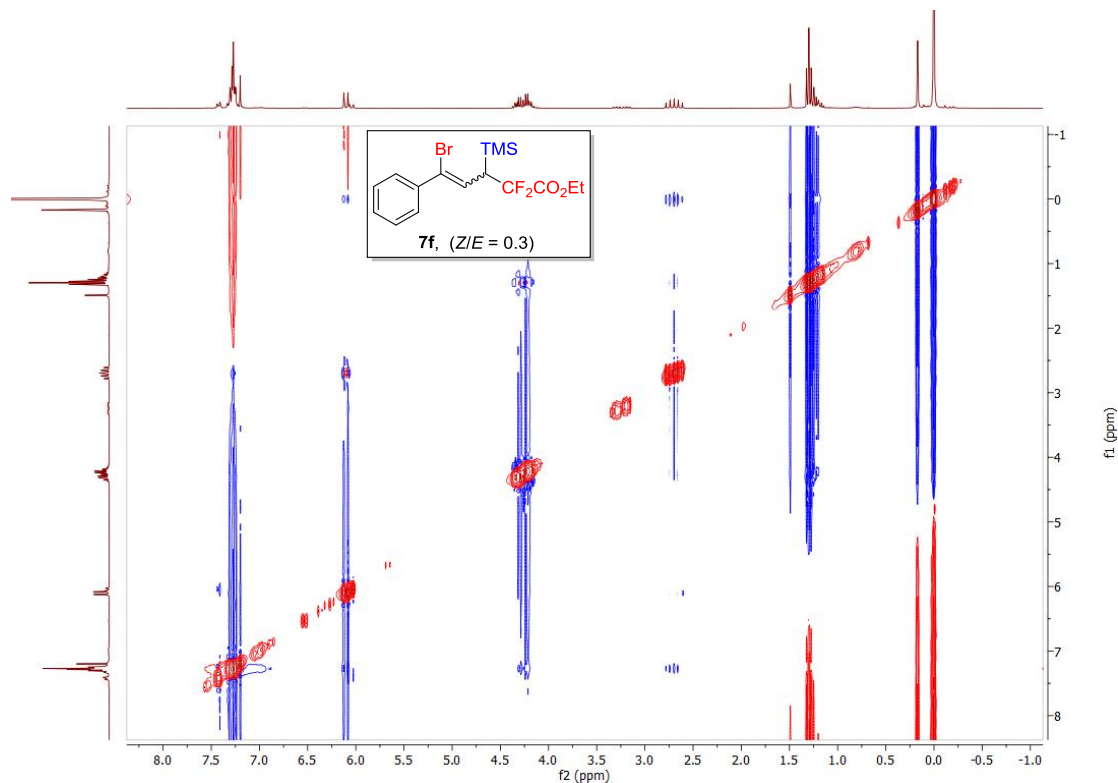

### 1,1 addition to $\text{TMSCHN}_2$

An oven-dried reaction tube was charged with  $\text{CoBr}_2$  (4.2 mg, 0.02 mmol, 0.05 equiv),  $\text{dppbz}$  (8.9 mg, 0.02 mmol, 0.05 equiv), Zn (10.24 mg, 0.16 mmol, 0.40 equiv). The tube was evacuated and backfilled with nitrogen for three times. Acetonitrile (2 mL) was added into the tube and stirred for 1 minutes. Trimethylsilyldiazomethane (0.52 mmol, 2 M in hexane, 1.3 equiv) was added into the system, followed with R-X (0.4 mmol, 1.0 equiv). The mixture was stirred at room temperature for 10 hours. The solvent was removed to leave a crude product, which was purified by column



chromatography on silica gel to afford the product.

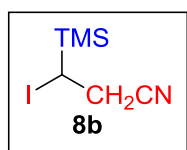

According to the general procedure, the product **8b** was purified with silica gel chromatography (Pe/EA = 5 : 1) as a pale yellow oil in 61% yield. <sup>1</sup>H NMR (300 MHz, CDCl<sub>3</sub>) δ 3.19 (dd, *J* = 9.6, 4.9 Hz, 1H), 3.06 (dd, *J* = 17.5, 4.9 Hz, 1H), 2.86 (dd, *J* = 17.5, 9.6 Hz, 1H), 0.21 (s, 9); <sup>13</sup>C NMR (75 MHz, CDCl<sub>3</sub>) δ 118.8, 24.3, 8.0, -2.3; HRMS (EI) (*m/z*): [M]<sup>+</sup> calcd for C<sub>6</sub>H<sub>12</sub>INSi: 252.9778, found: 252.9772.

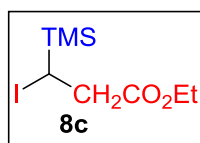

According to the general procedure, the product **8c** was purified with silica gel chromatography (Pe/EA = 30 : 1) as a pale yellow oil in 54% yield. <sup>1</sup>H NMR (300 MHz, CDCl<sub>3</sub>) δ 4.18 (q, *J* = 7.1 Hz, 2H), 3.45 (dd, *J* = 11.9, 3.8 Hz, 1H), 2.96 (dd, *J* = 16.4, 3.8 Hz, 1H), 2.74 (dd, *J* = 16.4, 11.9 Hz, 1H), 1.28 (t, *J* = 7.1 Hz, 3H), 0.15 (s, 9); <sup>13</sup>C NMR (75 MHz, CDCl<sub>3</sub>) δ 171.6, 61.0, 39.7, 14.2, 11.7, -2.4; HRMS (EI) (*m/z*): [M]<sup>+</sup> calcd for C<sub>8</sub>H<sub>17</sub>IO<sub>2</sub>Si: 300.0037, found: 300.0029.

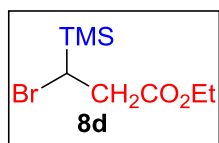

According to the general procedure, the product **8d** was purified with silica gel chromatography (Pe/EA = 30 : 1) as a pale yellow oil in 53% yield. <sup>1</sup>H NMR (300 MHz, CDCl<sub>3</sub>) δ 4.20 (q, *J* = 7.1 Hz, 2H), 3.63 (dd, *J* = 11.7, 3.7 Hz, 1H), 2.87 (dd, *J* = 16.2, 3.7 Hz, 1H), 2.72 (dd, *J* = 16.2, 11.7 Hz, 1H), 1.29 (t, *J* = 7.1 Hz, 3H), 0.15 (s, 9); <sup>13</sup>C NMR (75 MHz, CDCl<sub>3</sub>) δ 171.4, 61.0, 39.0, 36.1, 14.2, -3.2; HRMS (EI) (*m/z*): [M]<sup>+</sup> calcd for C<sub>8</sub>H<sub>17</sub>BrO<sub>2</sub>Si: 252.0176, found: 252.0181.

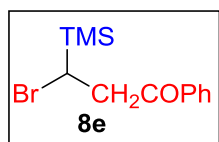

According to the general procedure, the product **8e** was purified with silica gel chromatography (Pe/EA = 30 : 1) as a pale yellow oil in 55% yield. <sup>1</sup>H NMR (300 MHz, CDCl<sub>3</sub>) δ 7.98-7.94 (m, 2H), 7.61-7.54 (m, 1H), 7.50-7.45 (m, 2H), 3.91 (dd, *J* = 10.7, 3.5 Hz, 1H), 3.63 (dd, *J* = 17.4, 10.7 Hz, 1H), 3.29 (dd, *J* = 17.4, 3.5 Hz, 1H), 0.20 (s, 9); <sup>13</sup>C NMR (75 MHz, CDCl<sub>3</sub>) δ 197.3, 136.8, 133.3, 128.6, 128.1, 42.0, 34.8, -3.0; HRMS (EI) (*m/z*): [M]<sup>+</sup> calcd for C<sub>12</sub>H<sub>17</sub>BrOSi: 284.0227, found: 284.0221.

### 3. Gram scale experiments

#### Gram scale synthesis of **8a**

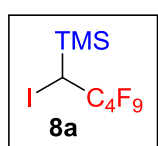

An oven-dried reaction tube was charged with CoBr<sub>2</sub> (21.6 mg, 0.1 mmol, 0.05 equiv), dppbz (44.6 mg, 0.1 mmol, 0.05 equiv), Zn (21.6 mg, 0.4 mmol, 0.20 equiv). The tube was evacuated and backfilled with nitrogen for three times. Acetonitrile (15 mL) was added into the tube and stirred for 1 minutes.



Trimethylsilyldiazomethane (2.6 mmol, 2 M in hexane, 1.3 equiv) was added into the system, followed with C<sub>4</sub>F<sub>9</sub>I (2 mmol, 1.0 equiv). The mixture was stirred at room temperature for 1 hours. The solvent was removed to leave a crude product, which was purified by column chromatography on silica gel (Pe) to afford the product **8a** as a pale yellow oil. <sup>1</sup>H NMR (300 MHz, CDCl<sub>3</sub>) δ 3.49-3.37 (m, 1H), 0.32 (s, 9); <sup>13</sup>C NMR (75 MHz, CDCl<sub>3</sub>) δ 5.45 (t, *J* = 31.8 Hz), -0.32; <sup>19</sup>F NMR (564 MHz, CDCl<sub>3</sub>) δ -80.88 to -80.92 (m, 3F, *Z+E*), -96.1 to -97.3 (m, 2F), -115.6 to -116.2 (m, 1F), -119.6 to -120.3 (m, 1F), -124.5 to -125.1 (m, 1F), -126.4 to -127.0 (m, 1F, *Z+E*); HRMS (EI) (*m/z*): [M-TMS]<sup>+</sup> calcd for C<sub>5</sub>HF<sub>8</sub>I: 339.8990, found: 339.8981.

#### Gram scale synthesis of **6a**

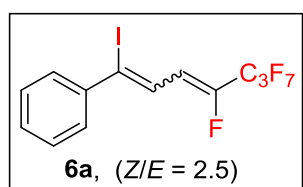

An oven-dried reaction tube was charged with CoBr<sub>2</sub> (21.6 mg, 0.1 mmol, 0.05 equiv), dppbz (44.6 mg, 0.1 mmol, 0.05 equiv), Zn (21.6 mg, 0.4 mmol, 0.20 equiv). The tube was evacuated and backfilled with nitrogen for three times. Acetonitrile (15 mL) was added into the tube and stirred for 1 minutes. Trimethylsilyldiazomethane (2.6 mmol, 2 M in hexane, 1.7 equiv) was added into the system, followed with C<sub>4</sub>F<sub>9</sub>I (2 mmol, 1.3 equiv). The mixture was stirred at room temperature for 1 hour minutes until nearly no bubble came out. Then phenyl acetylene (2.0 mmol) was added into the system and reacted for another 10 hours. Then CsF (0.6 mmol, 0.3 equiv) was added into the system and reacted for another 2 hours. The solvent was removed to leave a crude product, which was purified by column chromatography on silica gel (Pe) to afford the product **6a** as a pale yellow oil. <sup>1</sup>H NMR (300 MHz, CDCl<sub>3</sub>) δ 7.58-7.53 (m, 2H), 7.41-7.30 (m, 5.25H), 6.86 (dd, *J* = 10.6, 0.8 Hz, 1H), 6.54 (dd, *J* = 31.5, 10.6 Hz, 1H), 6.01 (dd, *J* = 31.2, 11.4 Hz, 0.4H); <sup>13</sup>C NMR (75 MHz, CDCl<sub>3</sub>) δ 142.1, 129.7, 129.5 (minor), 128.9 (minor), 128.8, 128.6 (minor), 128.5, 126.1, 117.9 (d, *J* = 4.1 Hz); <sup>19</sup>F NMR (564 MHz, CDCl<sub>3</sub>) δ -80.7 (t, *J* = 9.2 Hz, 3F), -80.8 (t, *J* = 9.1 Hz, 0.85H, *E*), -118.5 (dq, *J* = 16.4, 8.3 Hz, 2F), -118.75 (dq, *J* = 16.4, 8.2 Hz, 0.72F, *E*), -123.3 to -123.4 (m, 1F), -127.0 (d, *J* = 7.7 Hz, 2F), -127.2 (d, *J* = 7.3 Hz, 0.7F, *E*); HRMS (EI) (*m/z*): [M-TMS]<sup>+</sup> calcd for C<sub>13</sub>H<sub>7</sub>F<sub>8</sub>I: 441.9459, found: 441.9450.

## 4. Fellow-up reactions

### Palladium-catalyzed Sonogashira coupling

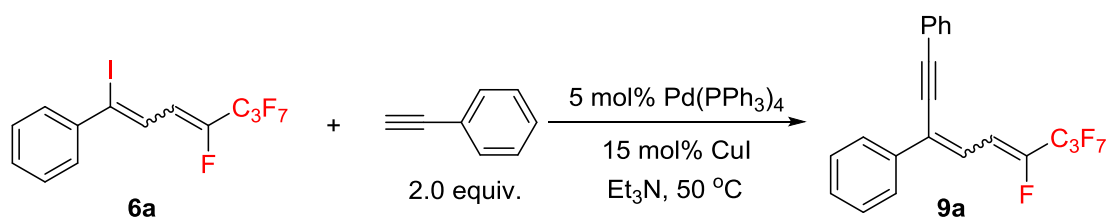

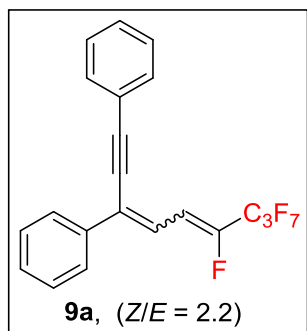

To a 10 mL of Schlenk tube were added Pd (PPh<sub>3</sub>)<sub>4</sub> (5 mol%, 0.01 mol, 11.5 mg), CuI (15 mol%, 0.03 mmol, 5.7 mg). The mixture was evacuated and backfilled with N<sub>2</sub> for 3 times. Et<sub>3</sub>N (2.0 mL), **6a** (1.0 equiv, 0.2 mmol, 88.4 mg) and phenylacetylene (2.0 equiv, 0.4 mmol, 40.8 mg) were added subsequently. The mixture was stirred at 50 °C for 6 hours. After cooling to room temperature, the solvent was removed under vacuum and purified by flash column chromatography on silica gel (PE) to give the desired product **9a** with 82% yield (68.3 mg). <sup>1</sup>H NMR (300 MHz, CDCl<sub>3</sub>) δ 7.82-7.78 (m, 2H), 7.60-7.56 (m, 1.9H), 7.52-7.39 (m, 9H), 7.21 (dd, *J* = 11.5, 1.3 Hz, 1H), 7.02 (dd, *J* = 11.7, 1.3 Hz, 0.45H), 6.99 (dd, *J* = 32.0, 10.4 Hz, 1H), 6.45 (dd, *J* = 31.3, 11.8 Hz, 0.44H); <sup>13</sup>C NMR (75 MHz, CDCl<sub>3</sub>) δ 136.6, 136.3 (minor), 131.8 (minor), 131.7, 129.4 (minor), 129.2, 129.03, 128.99 (minor), 128.89 (minor), 128.71, 128.67 (minor), 128.6, 128.4 (minor), 126.7, 123.5 (minor), 122.6 (minor), 122.4, 121.4, 113.29 (q, *J* = 5.1 Hz), 111.6 (q, *J* = 5.3 Hz) (minor), 100.2, 94.1 (minor), 90.8 (minor), 85.3; <sup>19</sup>F NMR (564 MHz, CDCl<sub>3</sub>) δ -80.7 (t, *J* = 8.9 Hz, 3F), -80.8 (t, *J* = 8.8 Hz, 1.35F, *E*), -118.2 (dq, *J* = 17.1, 8.8 Hz, 2F), -118.4 (dq, *J* = 17.1, 9.0 Hz, 0.92F, *E*), -126.2 to -126.4 (m, 1.5F, *Z+E*), -127.0 (d, *J* = 8.1 Hz, 2F), -127.2 (d, *J* = 8.0 Hz, 0.9F, *E*); HRMS (EI) (*m/z*): [M]<sup>+</sup> calcd for C<sub>21</sub>H<sub>12</sub>F<sub>10</sub>: 416.0806, found: 416.8013.

#### Palladium-catalyzed Sonogashira coupling

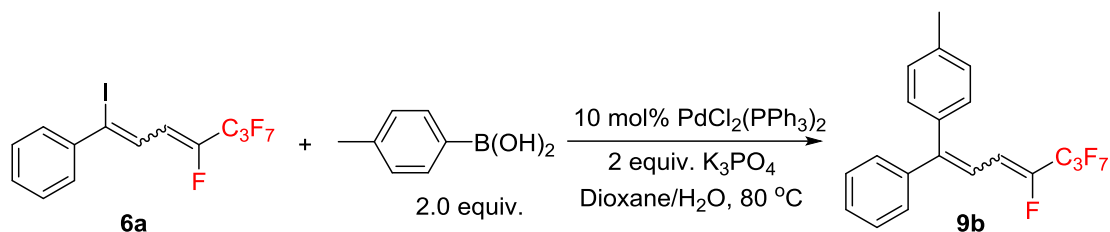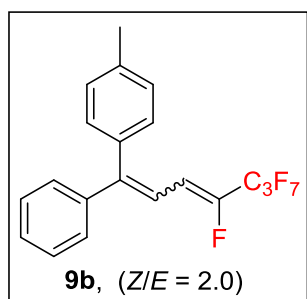

To a 10 mL of Schlenk tube were added 4-methylphenyl boronic acid (2.0 equiv, 0.4 mmol, 54.4 mg), PdCl<sub>2</sub>(PPh<sub>3</sub>)<sub>2</sub> (10 mol%, 0.02 mol, 14.0 mg), K<sub>3</sub>PO<sub>4</sub> (2.0 equiv, 0.4 mmol, 84.8 mg). The mixture was evacuated and backfilled with N<sub>2</sub> for 3 times. 1,4-dioxane (2 mL), H<sub>2</sub>O (100 uL) and **6a** (1.0 equiv, 0.2 mmol, 88.4 mg) were added subsequently. The mixture was stirred at 80 °C for 5 hours. After cooling to room temperature, the solvent was removed under vacuum and purified by flash column chromatography on silica gel (PE) to give the desired product **9b** with 73% yield (59.5 mg). <sup>1</sup>H NMR (300 MHz, CDCl<sub>3</sub>) δ 7.47-7.45 (m, 1H, *Z+E*), 7.36 (s, 3H), 7.29-7.12 (m, 5H), {6.95 (d, *J* = 11.4 Hz, *E*), 6.93 (d, *J* = 11.4 Hz, *Z*), 1H}, 6.37-6.16 (m, 1H, *Z+E*), 2.46 (s, 2H, *Z*), 2.40 (s, 1H, *E*) *J* = 31.2, 11.4 Hz, 0.4H); <sup>13</sup>C NMR (75 MHz, CDCl<sub>3</sub>) δ 141.3, 138.9,

138.5 (minor), 135.2, 130.2, 129.1 (minor), 128.7, 128.5, 128.4 (minor), 128.35, 128.2, 128.1 (minor), 115.2, 114.6 (minor), 113.0 (q,  $J = 5.1$  Hz), 21.3, 21.2 (minor);  $^{19}\text{F}$  NMR (564 MHz,  $\text{CDCl}_3$ )  $\delta$  -80.78 to -80.81 (m, 3F,  $Z+E$ ), -80.8 (t,  $J = 9.1$  Hz, 0.85H,  $E$ ), 118.2 (dq,  $J = 18.1, 9.2$  Hz, 2F,  $Z+E$ ), -127.3 (d,  $J = 8.1$  Hz, 2F), -130.6 to -130.7 (m, 0.7F,  $Z$ ), -130.7 to -130.9 (m, 0.73,  $E$ ); HRMS (EI) ( $m/z$ ):  $[\text{M}]^+$  calcd for  $\text{C}_{20}\text{H}_{14}\text{F}_8$ : 406.0962, found: 406.0953.

### Substitution with thiophenol

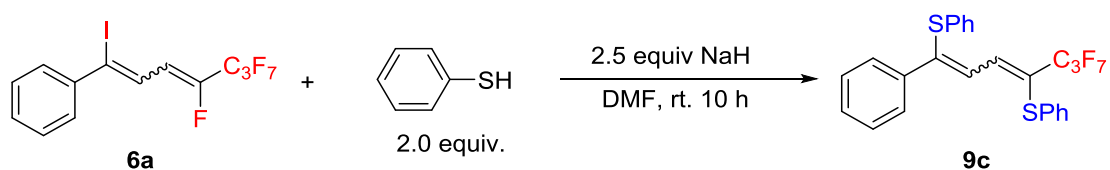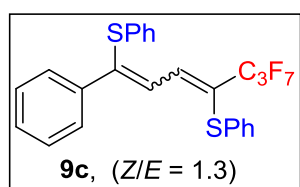

To a 10 mL of Schlenk tube was added NaH (3 equiv, 0.6 mmol, 14.4 mg). The tube was evacuated and backfilled with  $\text{N}_2$  for 3 times. DMF (2 mL) and thiophenol (2 equiv, 0.4 mmol, 44.0 mg) were added at  $0^\circ\text{C}$  and stirred for 10 minutes. Subsequently 3a' (1.0 equiv, 0.2 mmol, 88.4 mg) was added to the system and stirred for another 10 hours at room temperature. The system was quenched with  $\text{NH}_4\text{Cl}$  (aq) and extracted with dichloromethane (3 x 10 mL) and the combined organic layer was concentrated in vacuo. The crude product was purified by flash column chromatography on silica gel (PE) to give the desired product **9c** with 62% yield (65.5 mg).  $^1\text{H}$  NMR (300 MHz,  $\text{CDCl}_3$ )  $\delta$  8.25 (d,  $J = 10.6$  Hz, 1H), 7.62-7.59 (m, 2H), 7.52 (s, 3.6H), 7.49-7.46 (m, 2H), 7.41-7.17 (m, 19.1H), 6.60 (dt,  $J = 11.1, 1.3$  Hz, 0.67H); Due to the isomers, the  $^{13}\text{C}$  NMR is too complex, here just display all the carbon,  $^{13}\text{C}$  NMR (75 MHz,  $\text{CDCl}_3$ )  $\delta$  148.6, 138.5, 136.2 (minor), 135.5 (minor), 135.1 (minor), 134.6, 133.9 (minor), 130.2, 129.7 (minor), 129.5, 129.4, 129.3 (minor), 129.2, 129.1, 128.9, 128.6 (minor), 128.55, 128.53, 128.4, 128.0, 127.6, 127.5, 127.2, 126.8, 126.6, 126.2, 119.6;  $^{19}\text{F}$  NMR (564 MHz,  $\text{CDCl}_3$ )  $\delta$  -80.1 (t,  $J = 10.0$  Hz, 3F), -80.2 (t,  $J = 10.1$  Hz, 2.18F,  $E$ ), -107.2 (q,  $J = 10.1$  Hz, 2F), -107.4 (q,  $J = 10.1$  Hz, 1.5F,  $E$ ), -125.0 (s, 2F), -125.3 (s, 1.5F,  $E$ ); HRMS (EI) ( $m/z$ ):  $[\text{M}]^+$  calcd for  $\text{C}_{25}\text{H}_{17}\text{F}_7\text{S}_2$ : 514.0654, found: 514.0653.

## 5. References

[1]. G.-B. Roh, N. Iqbal, E. J. Cho, *Chin. J. Chem.* **2016**, *34*, 459-464.

## 6. $^1\text{H}$ , $^{13}\text{C}$ and $^{19}\text{F}$ NMR spectra

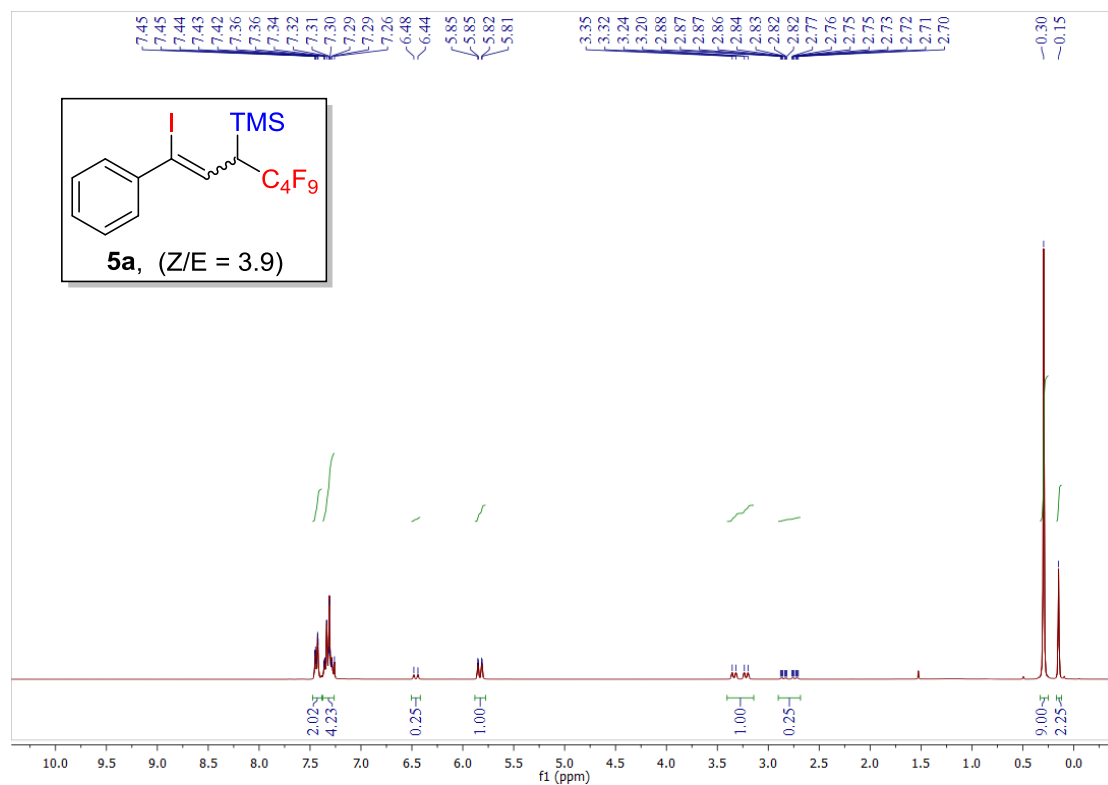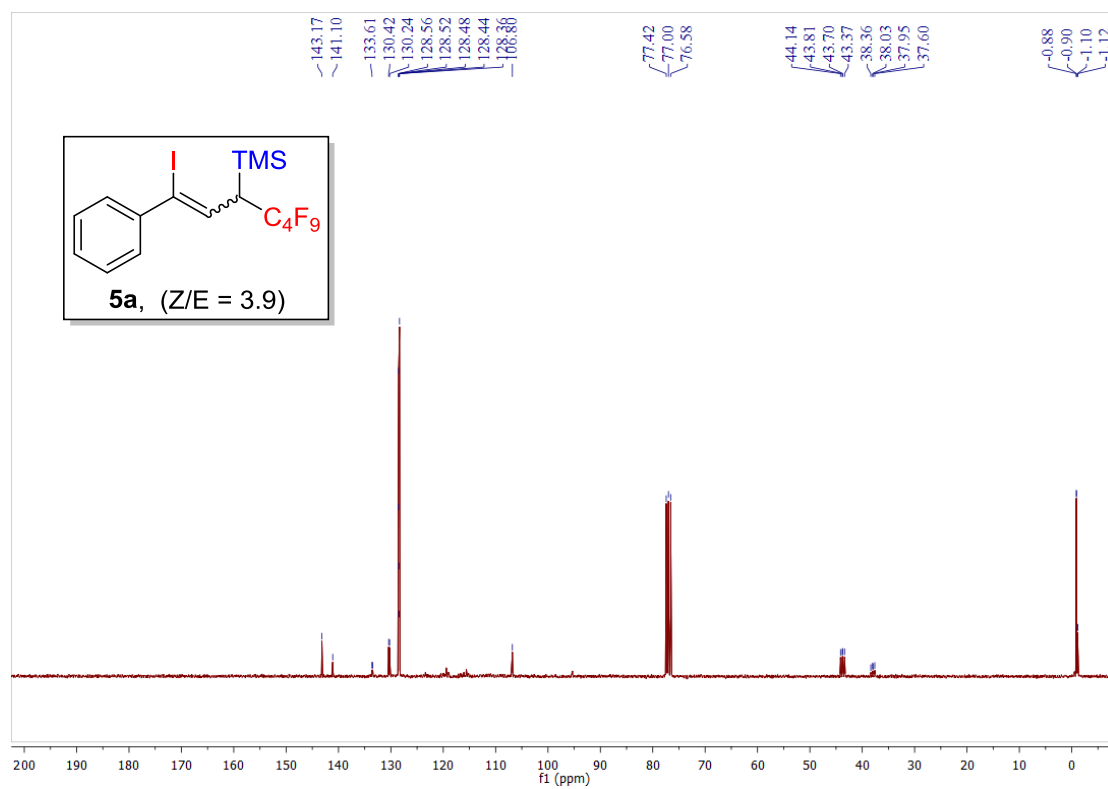

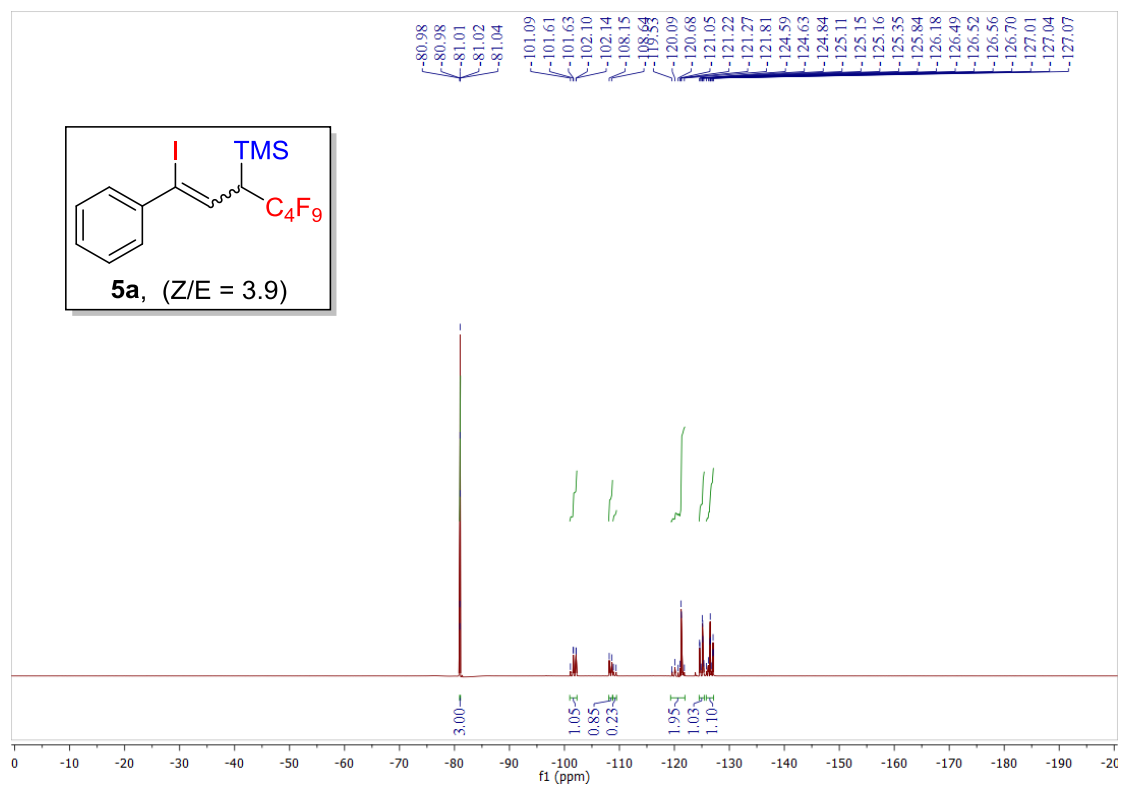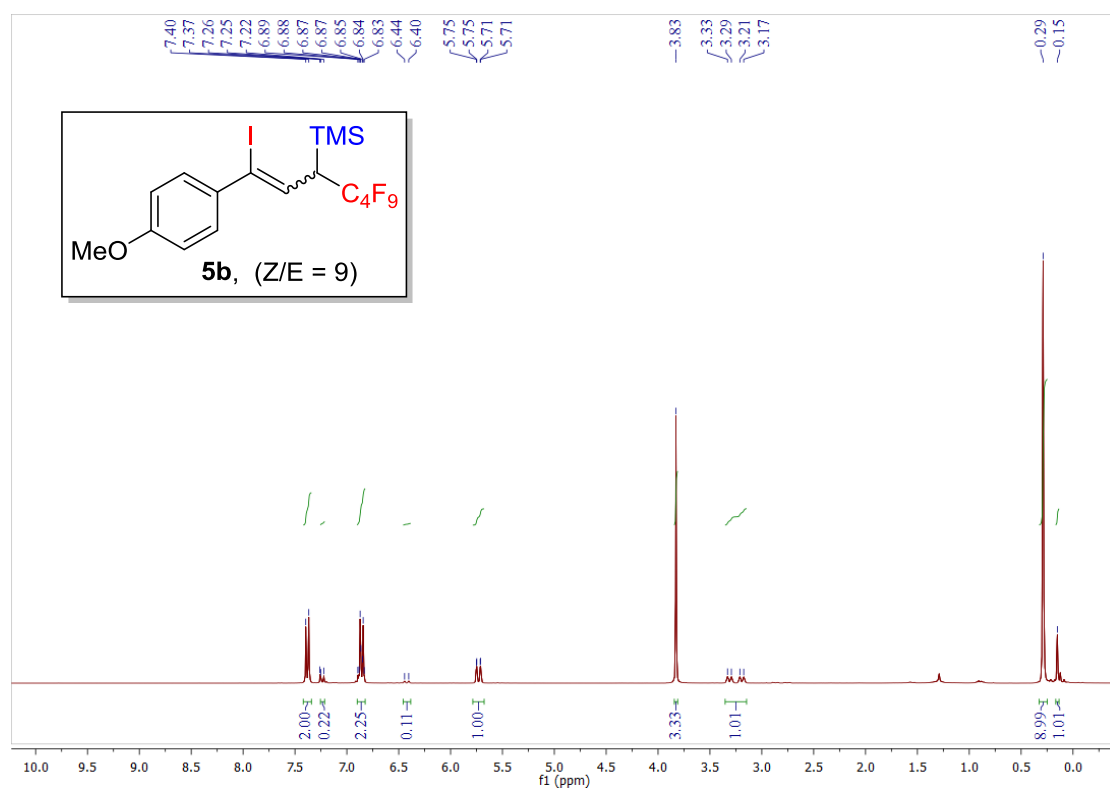

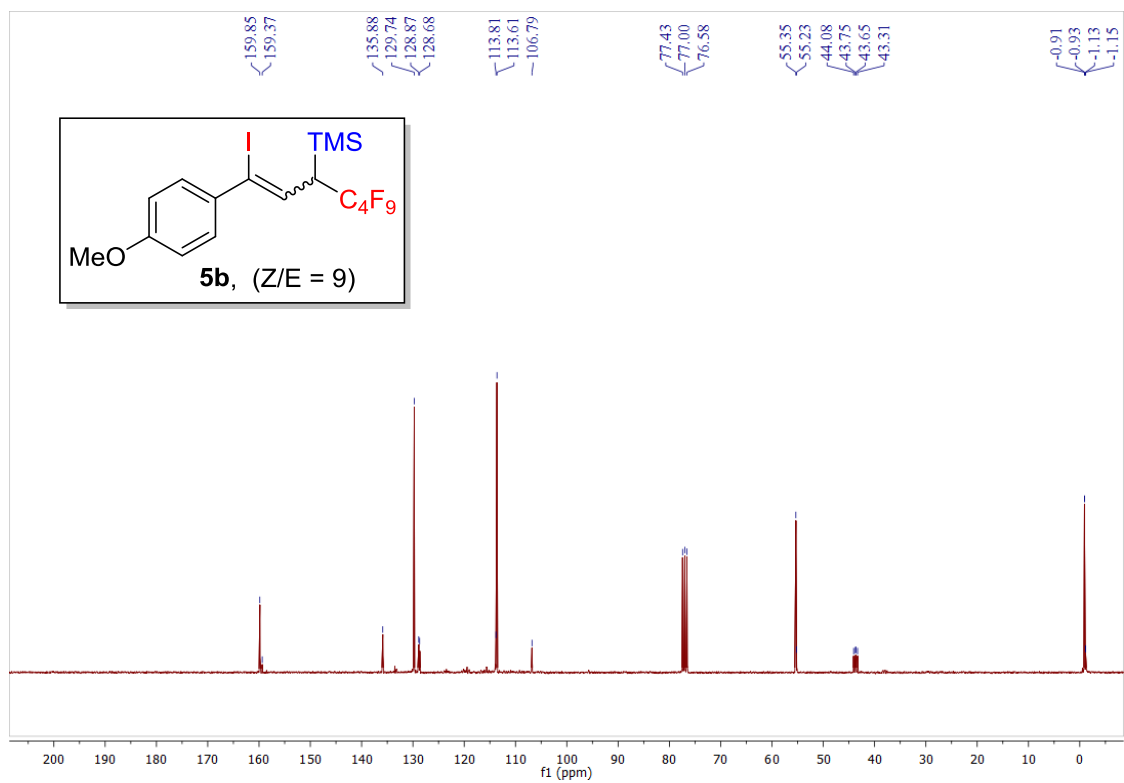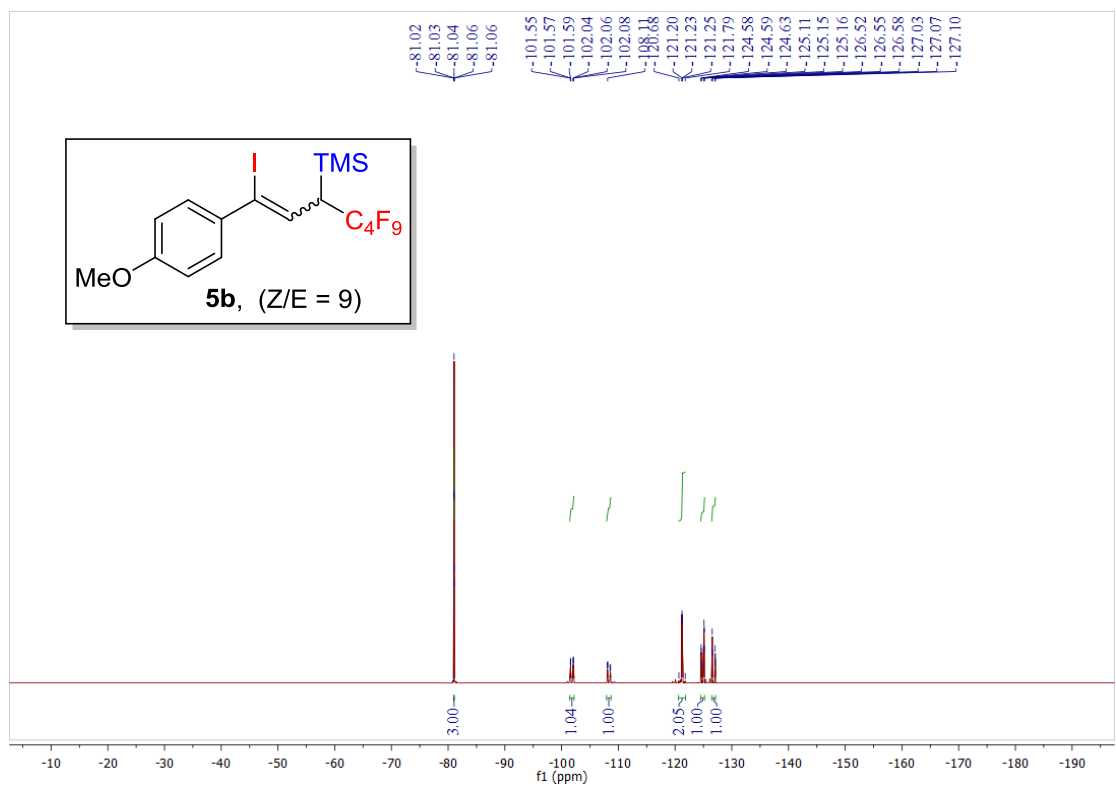

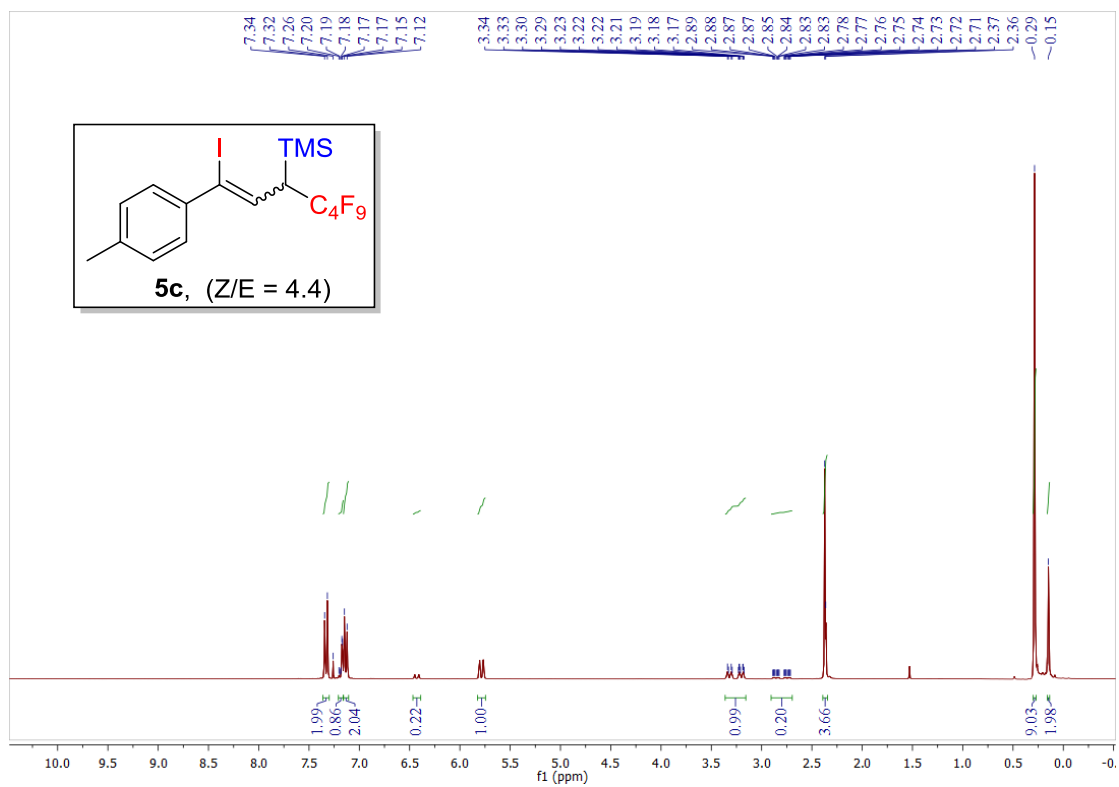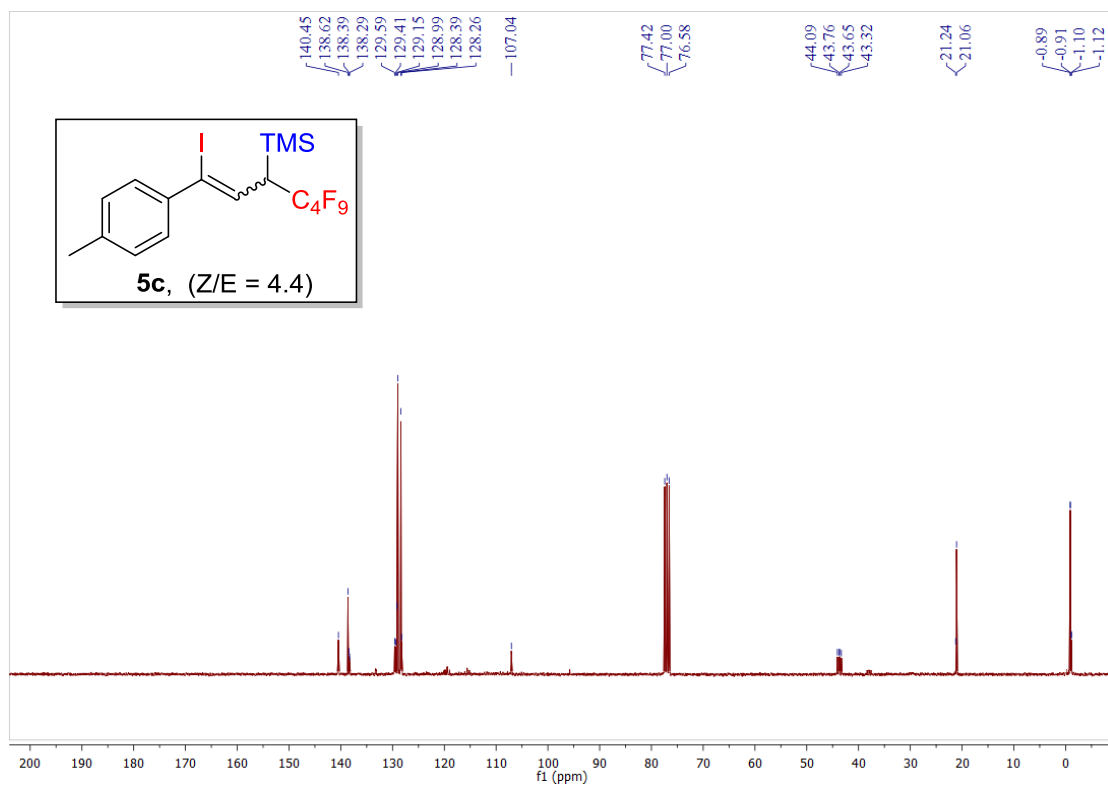

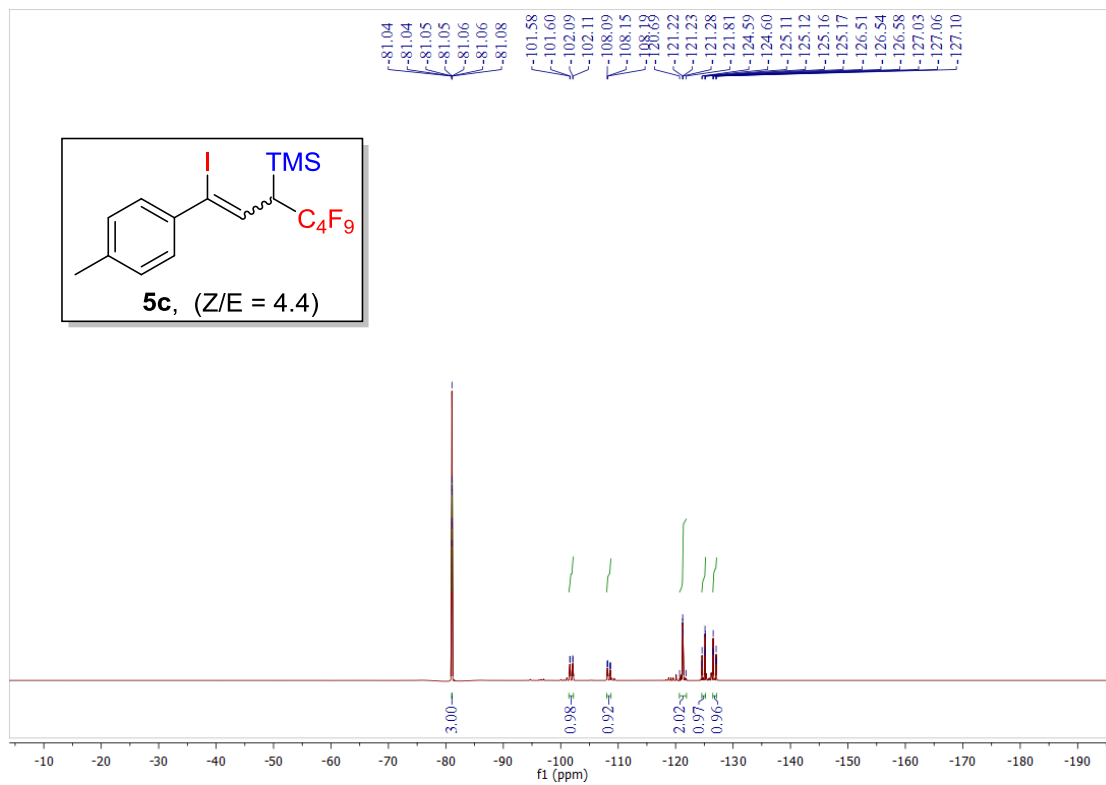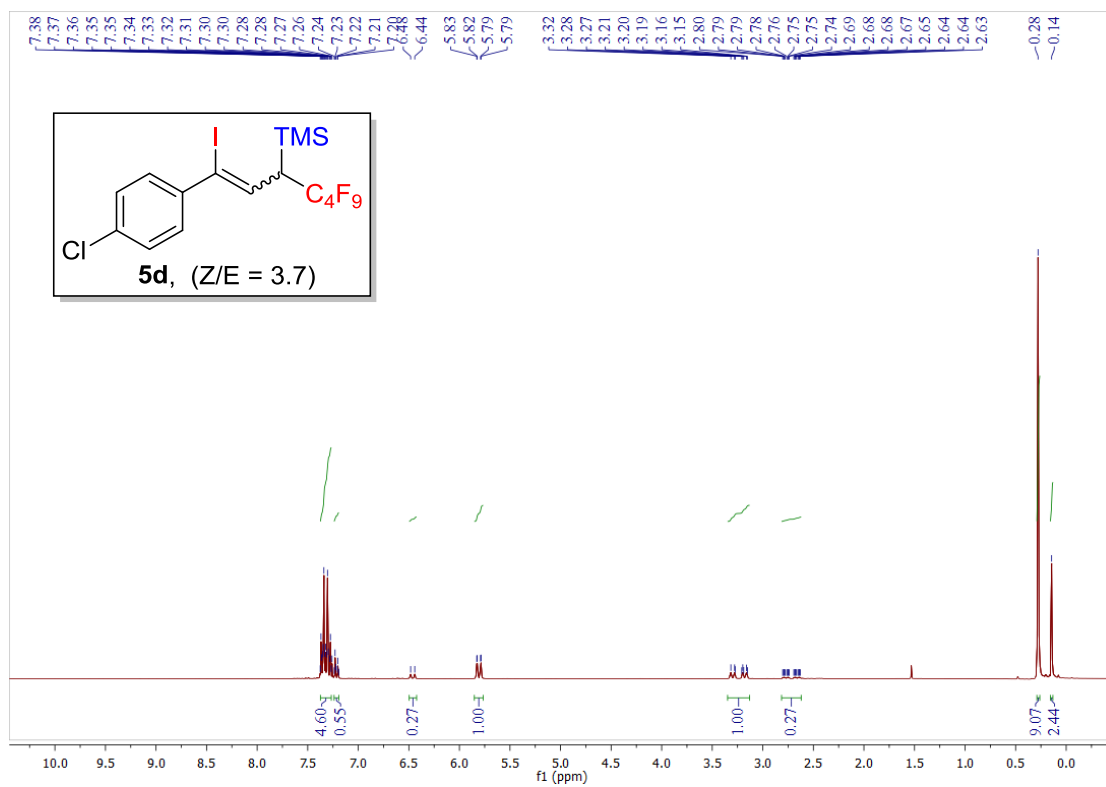



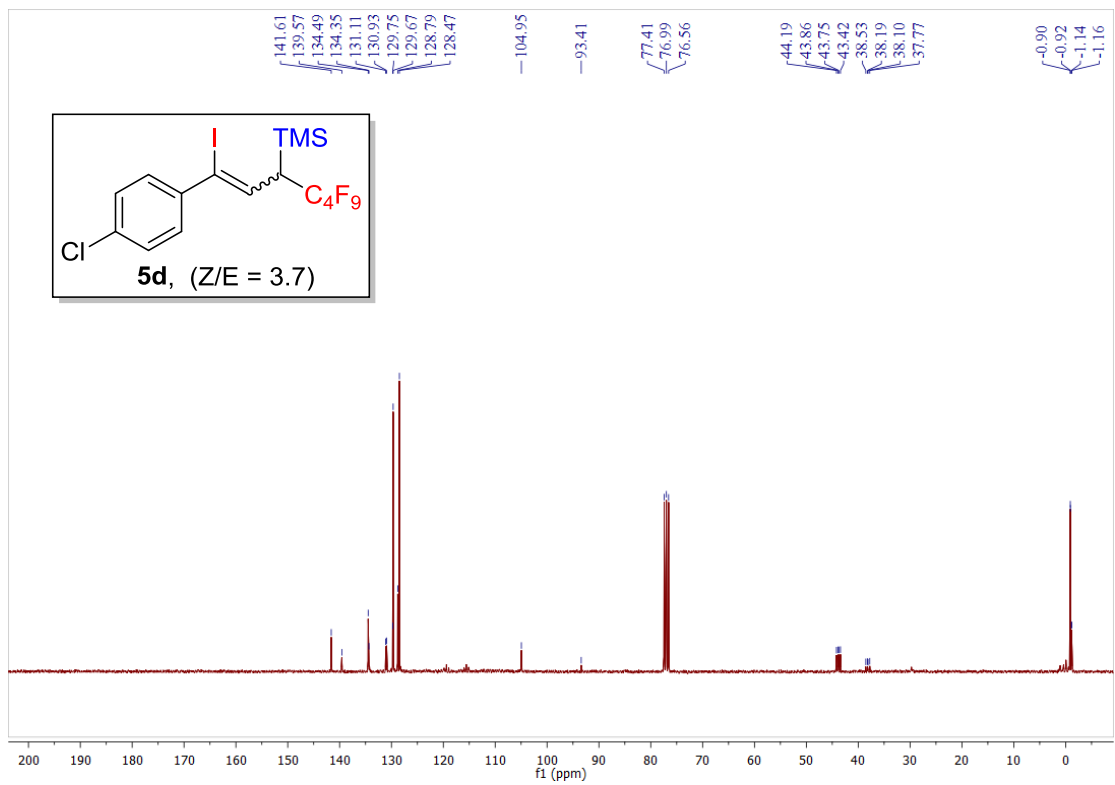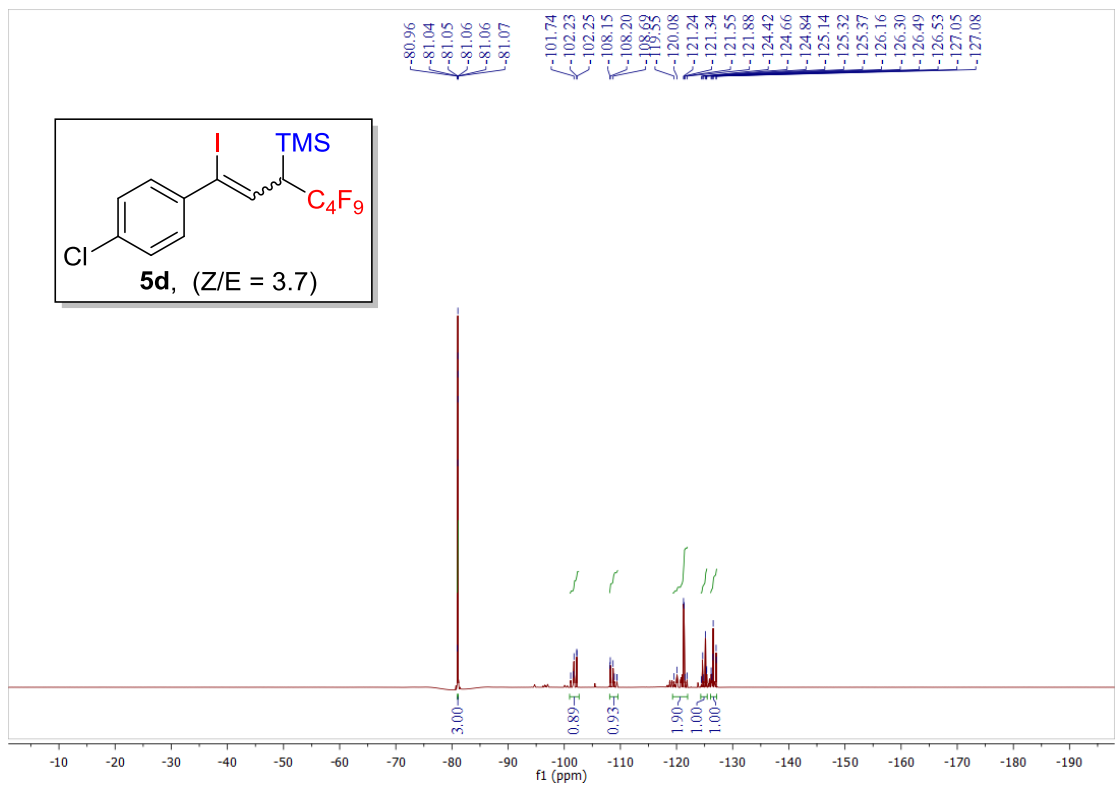

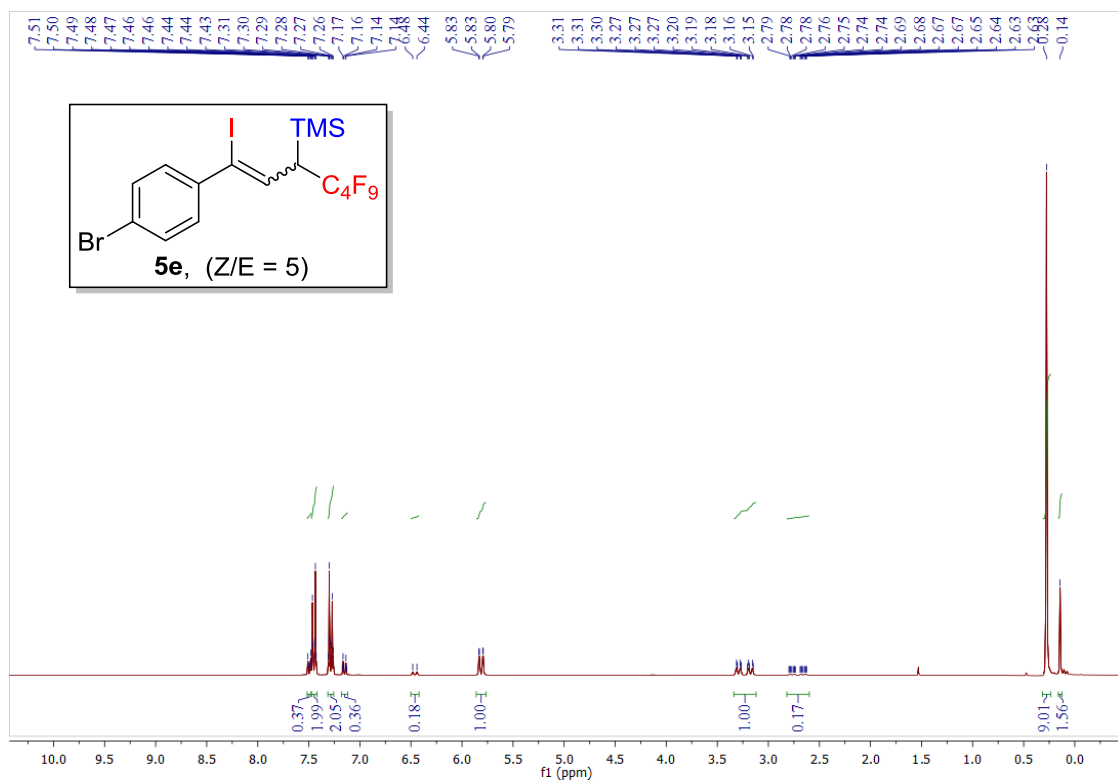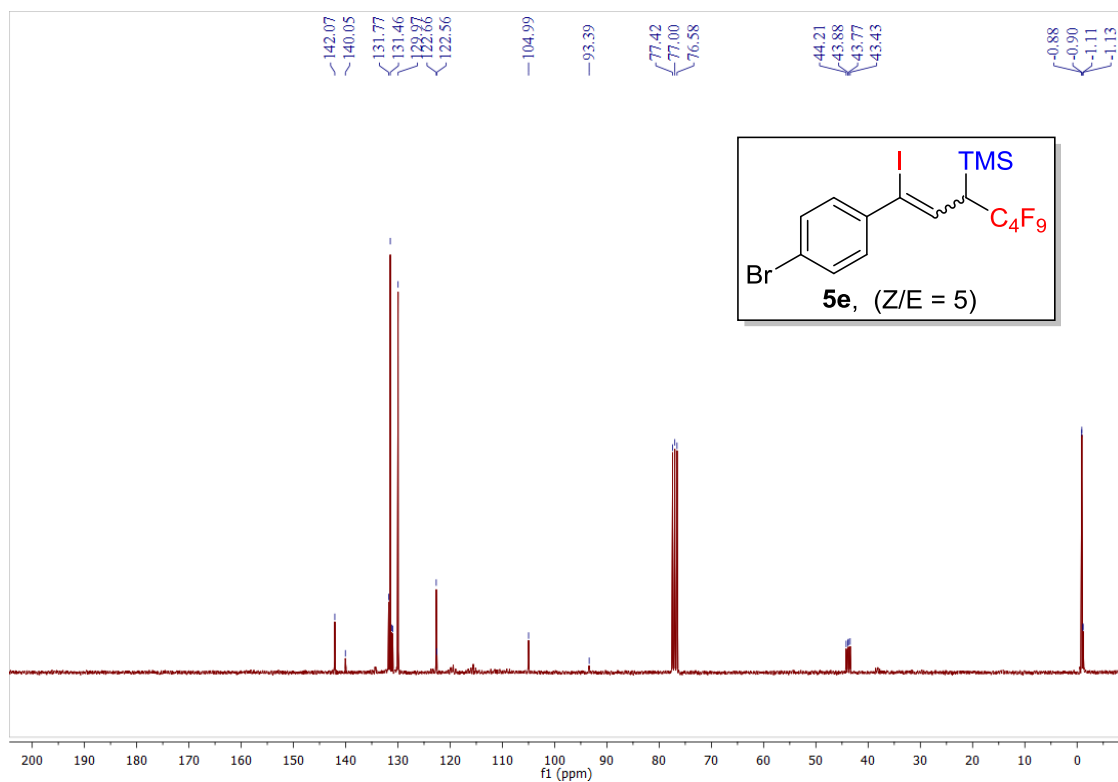

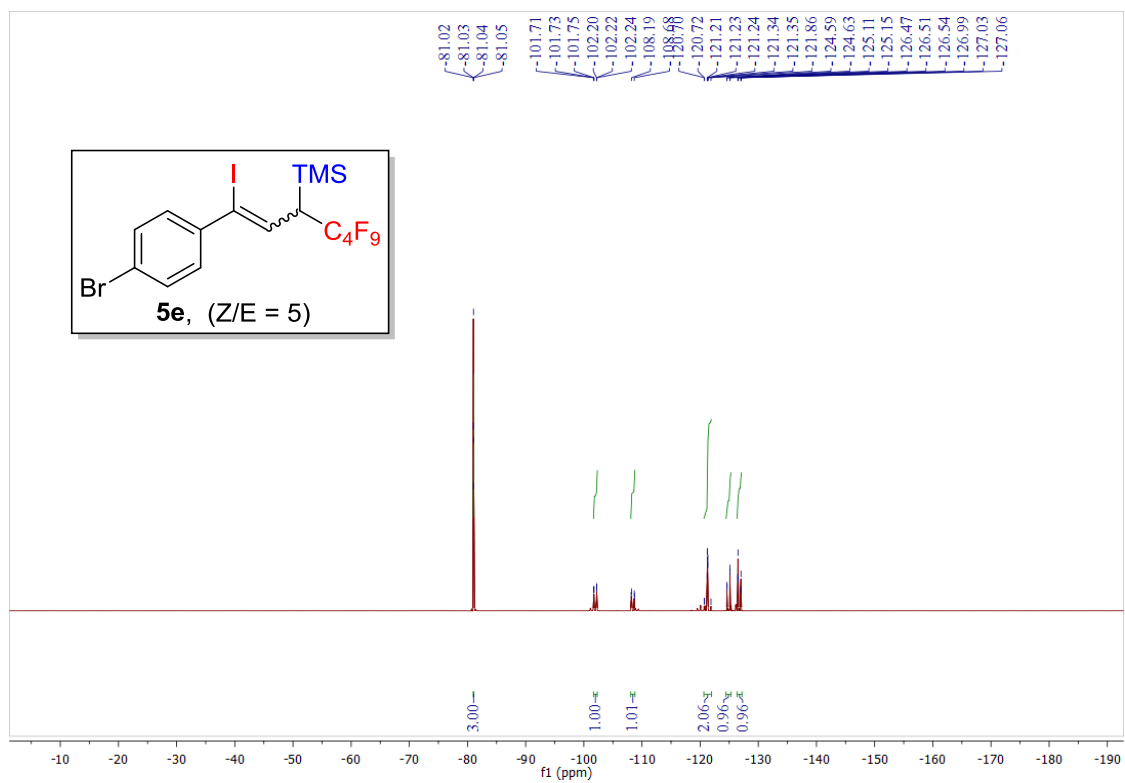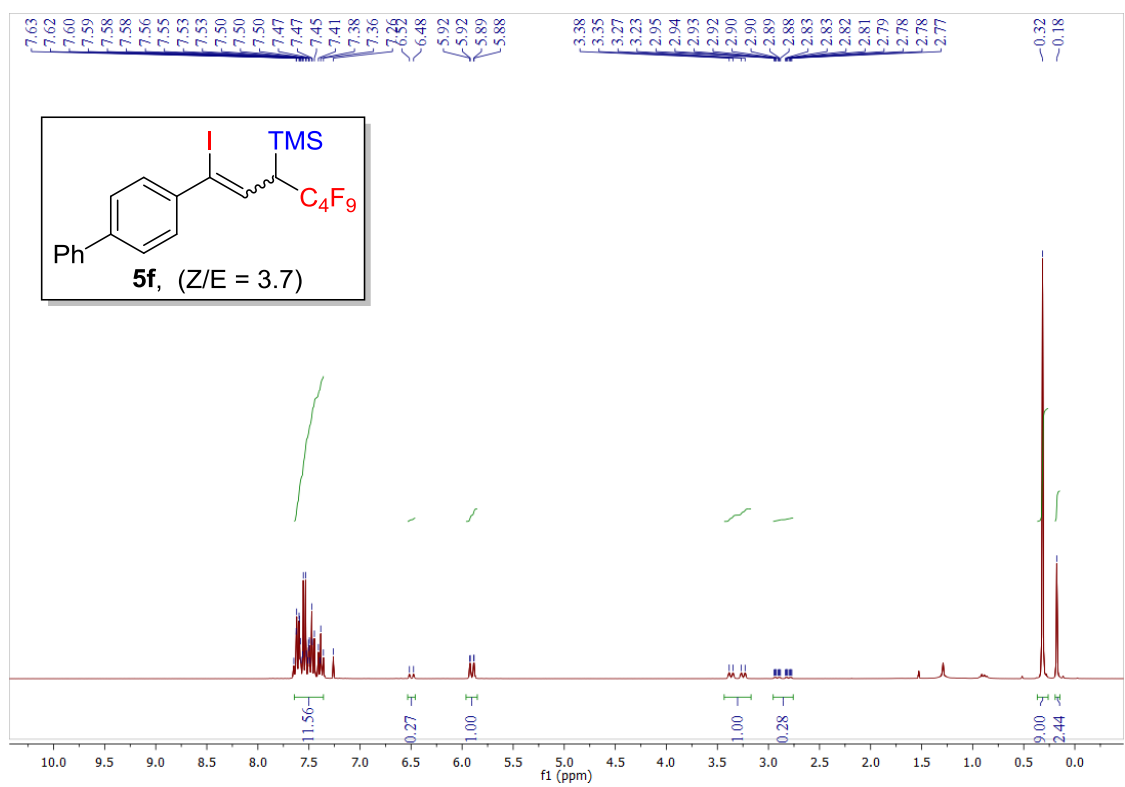



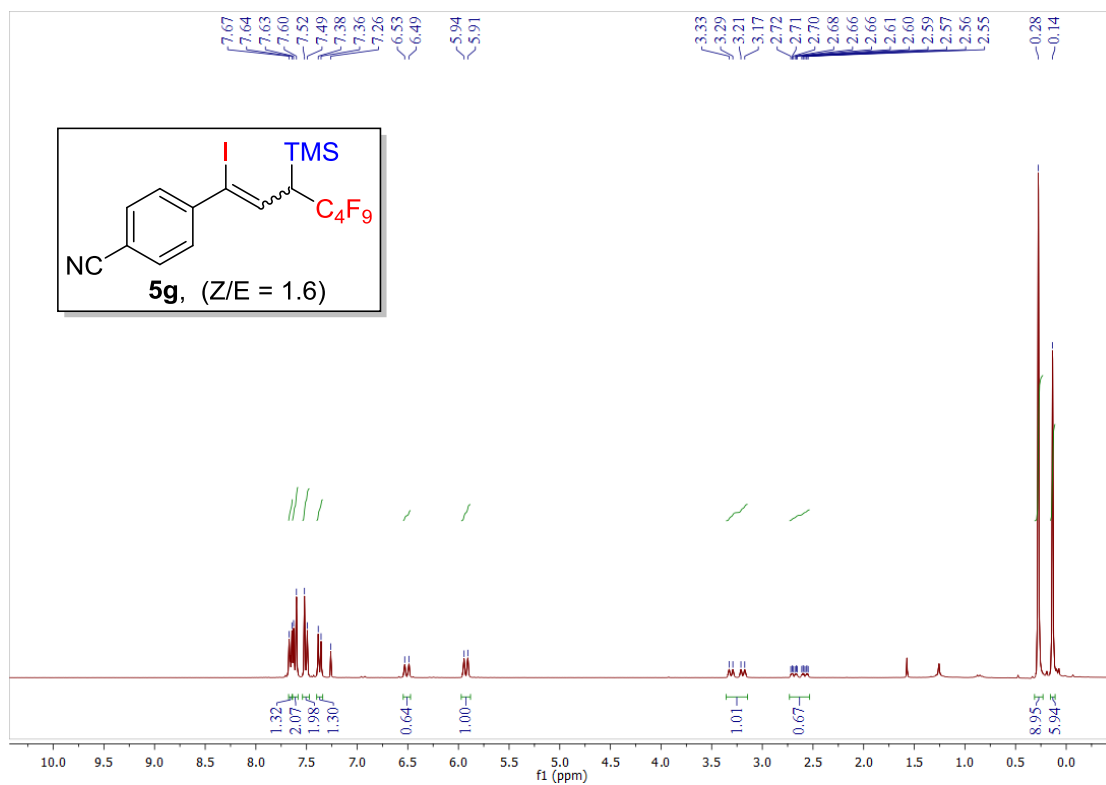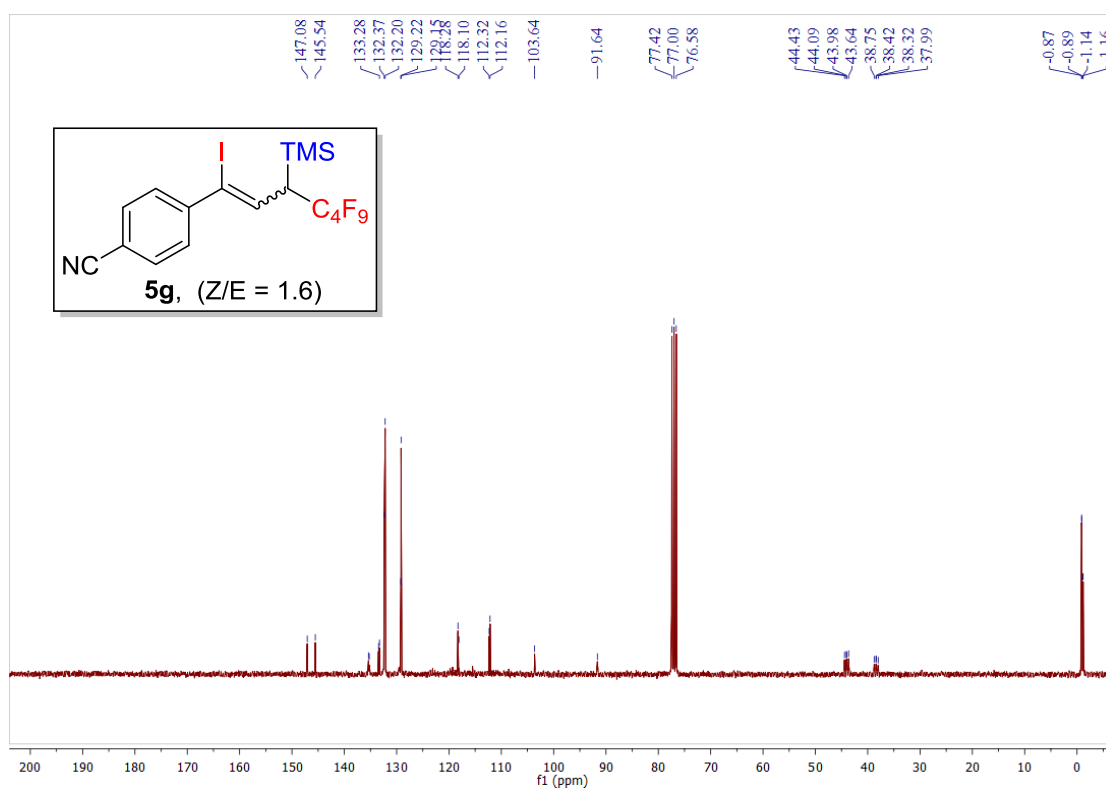

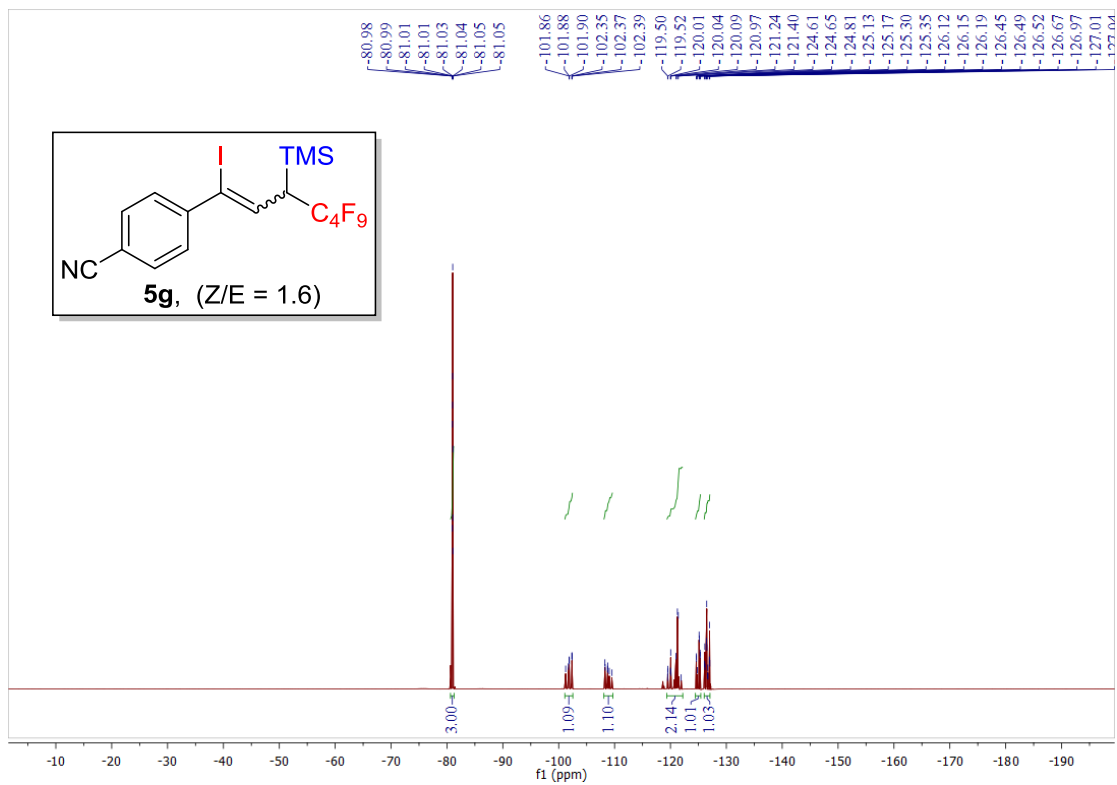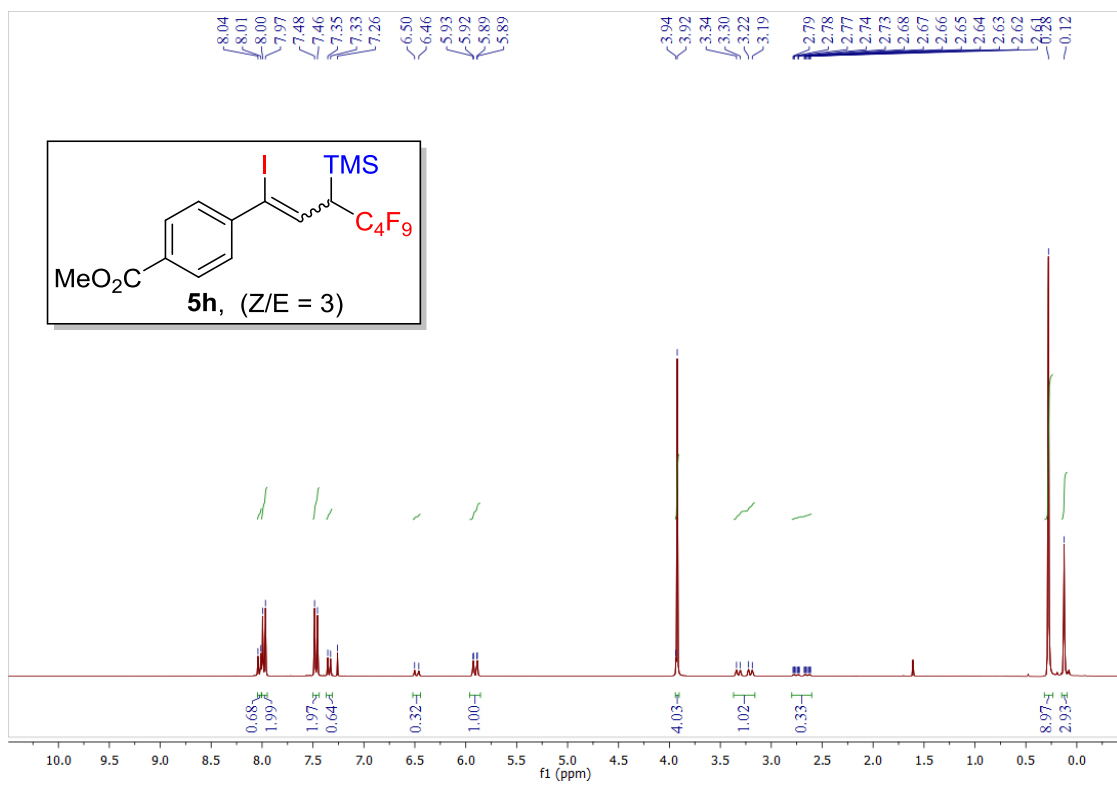

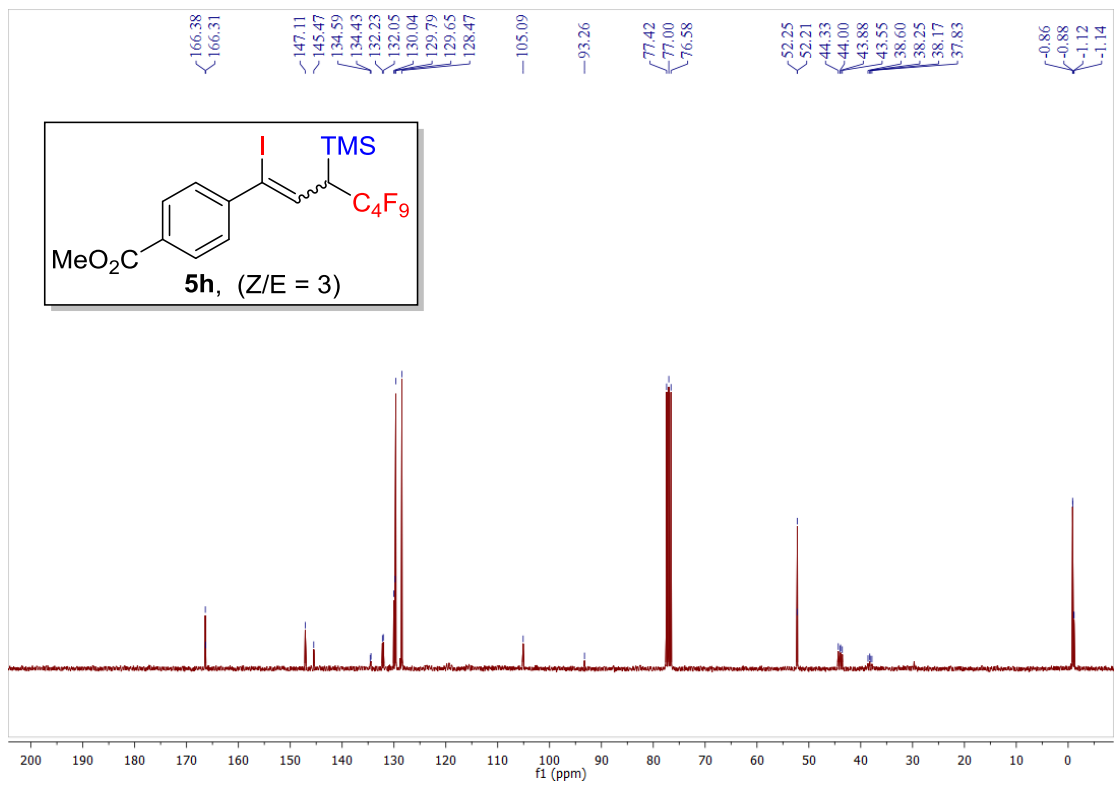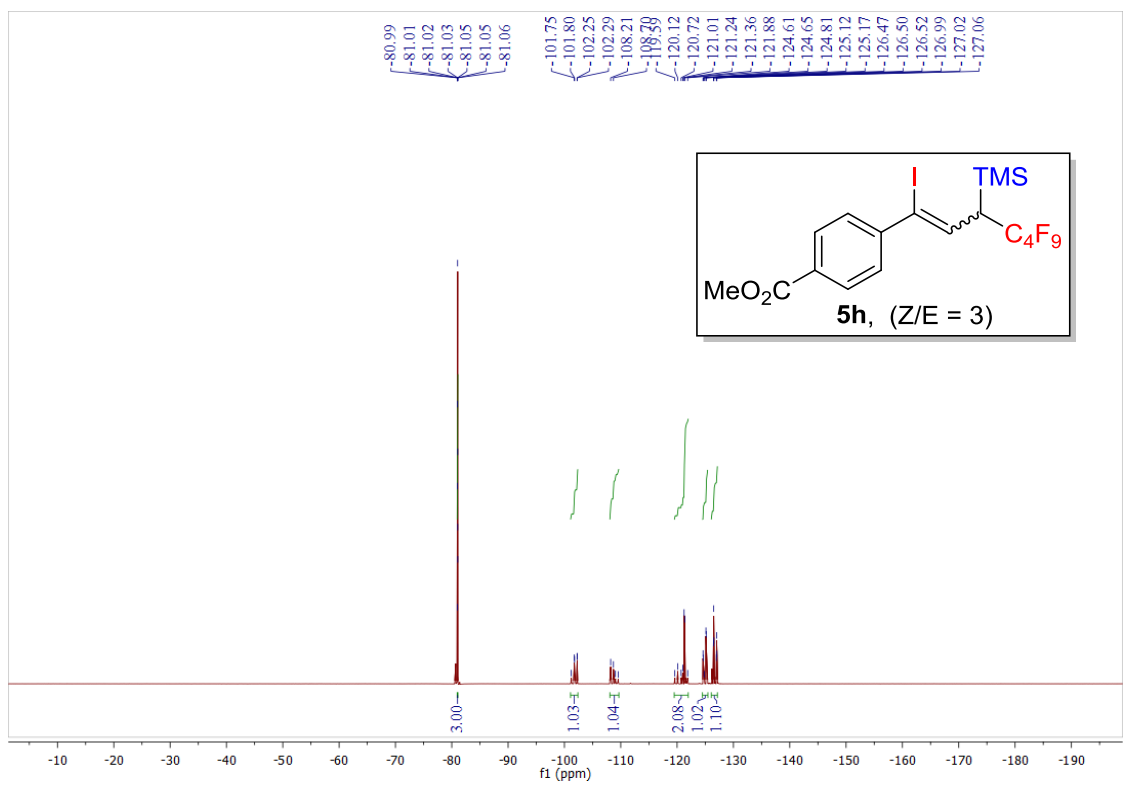

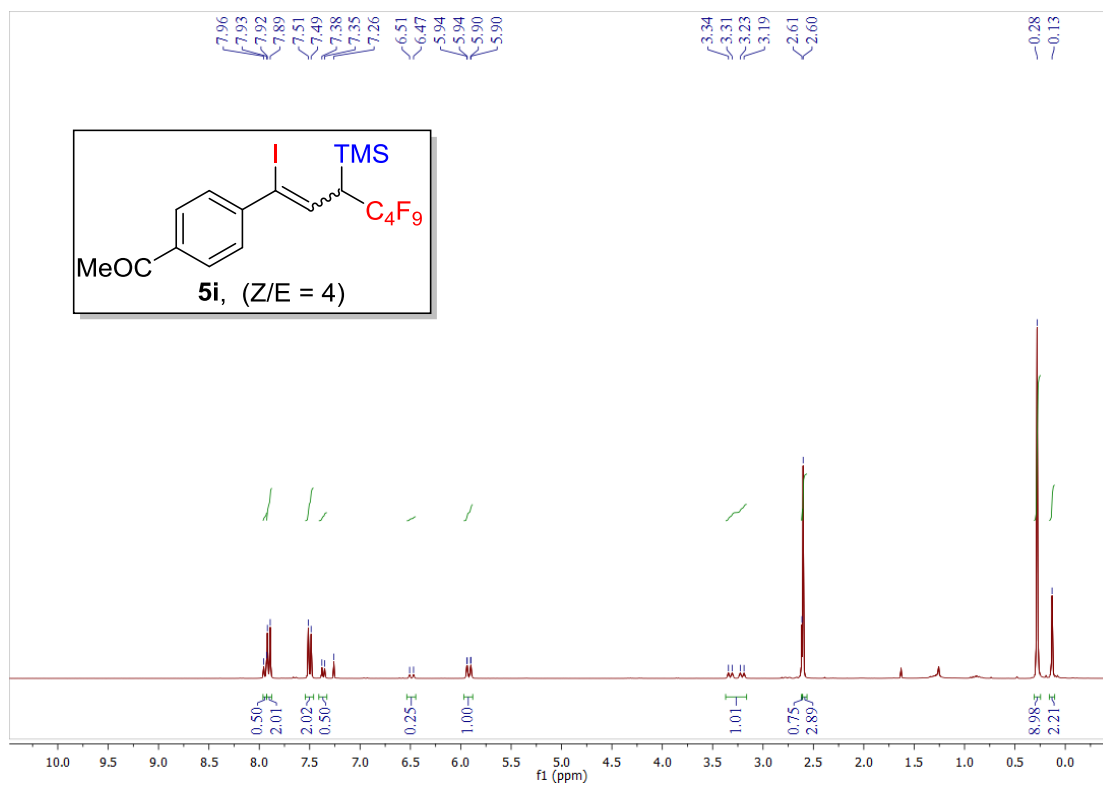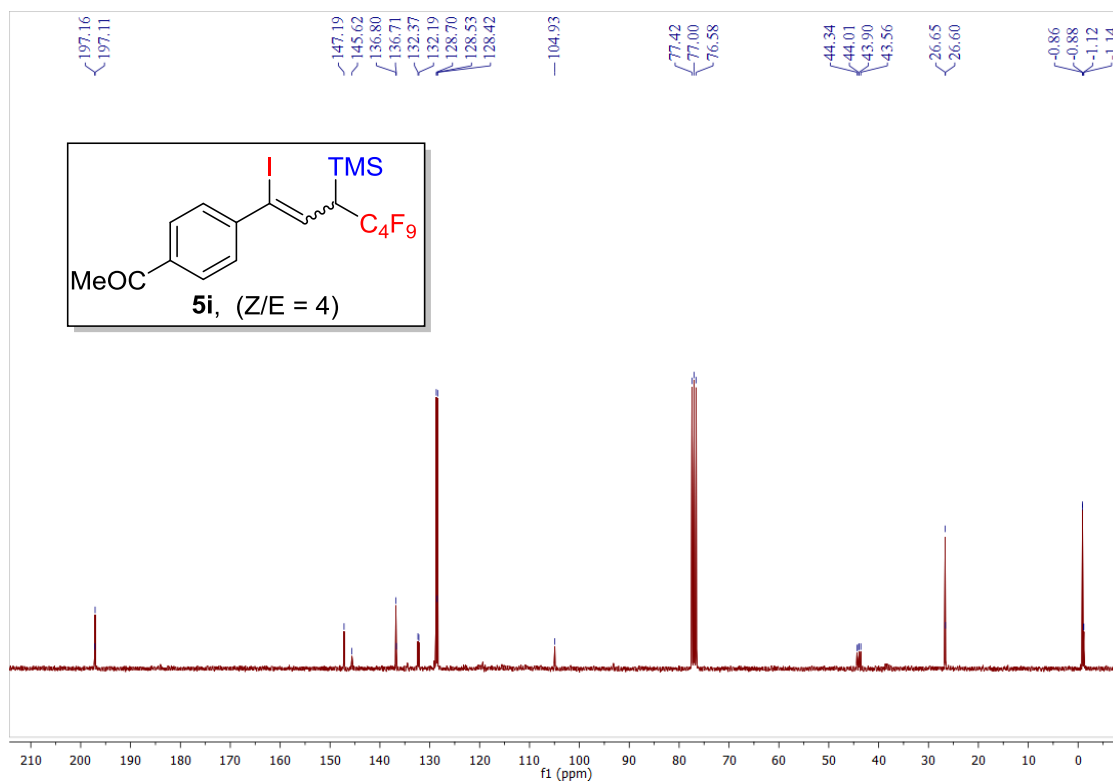



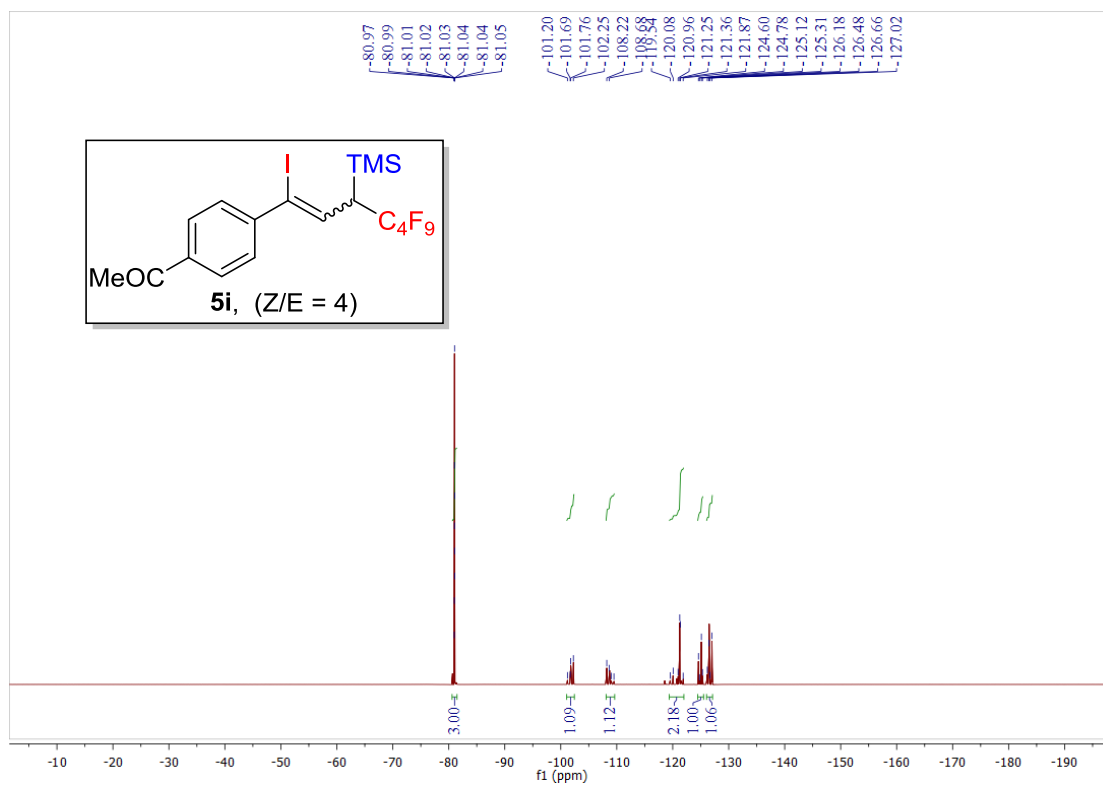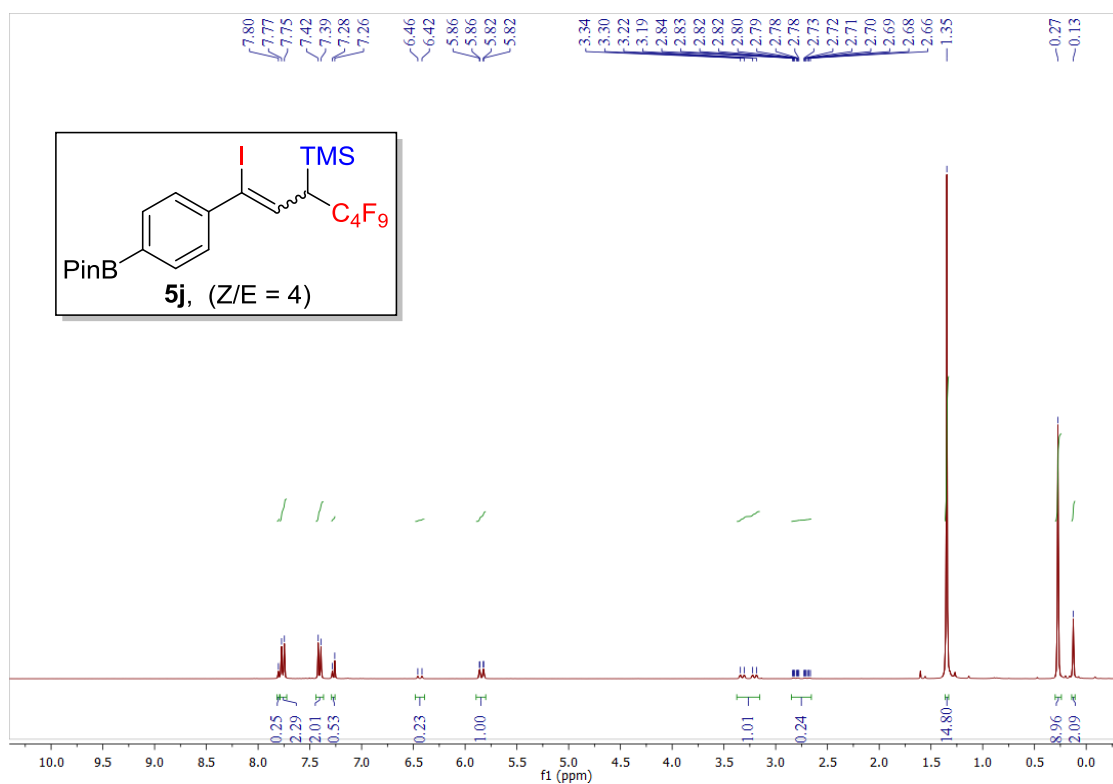

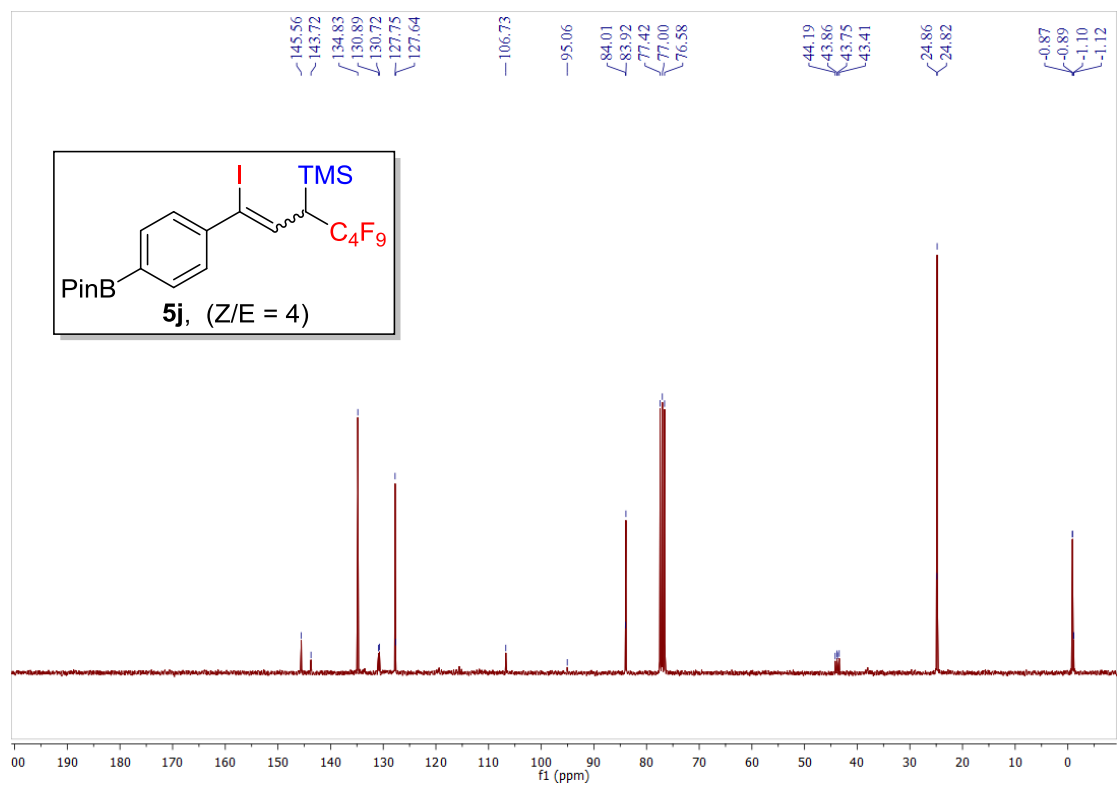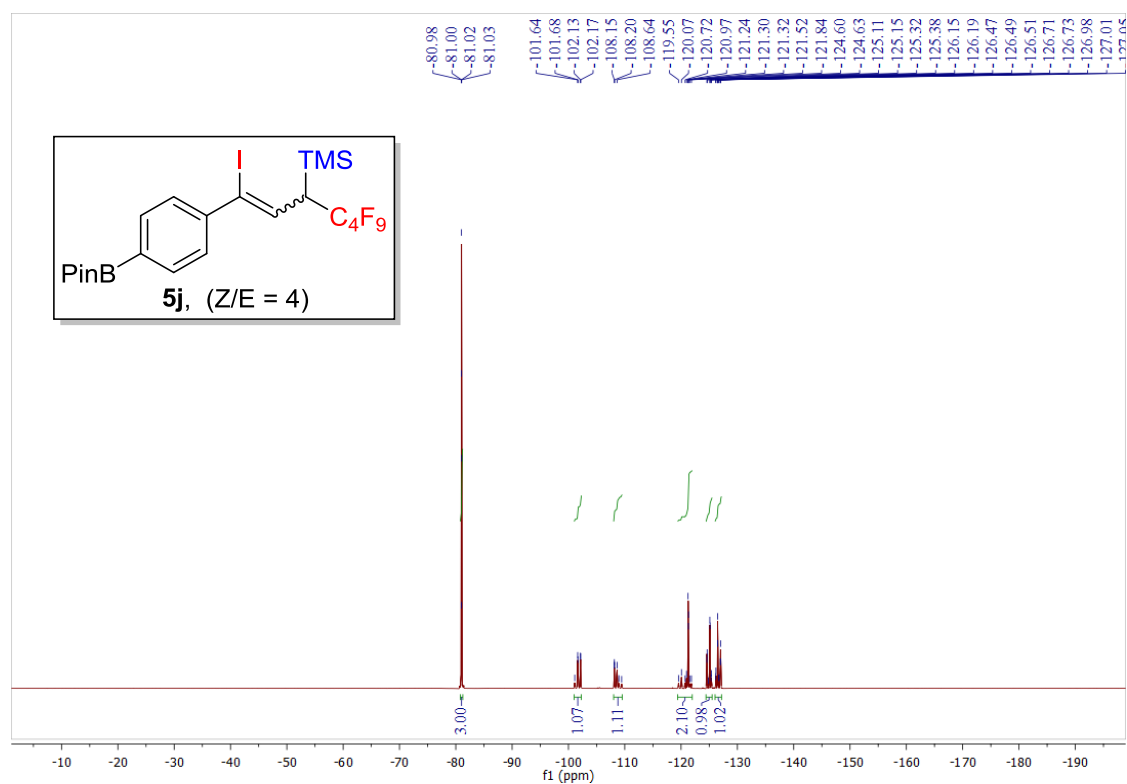

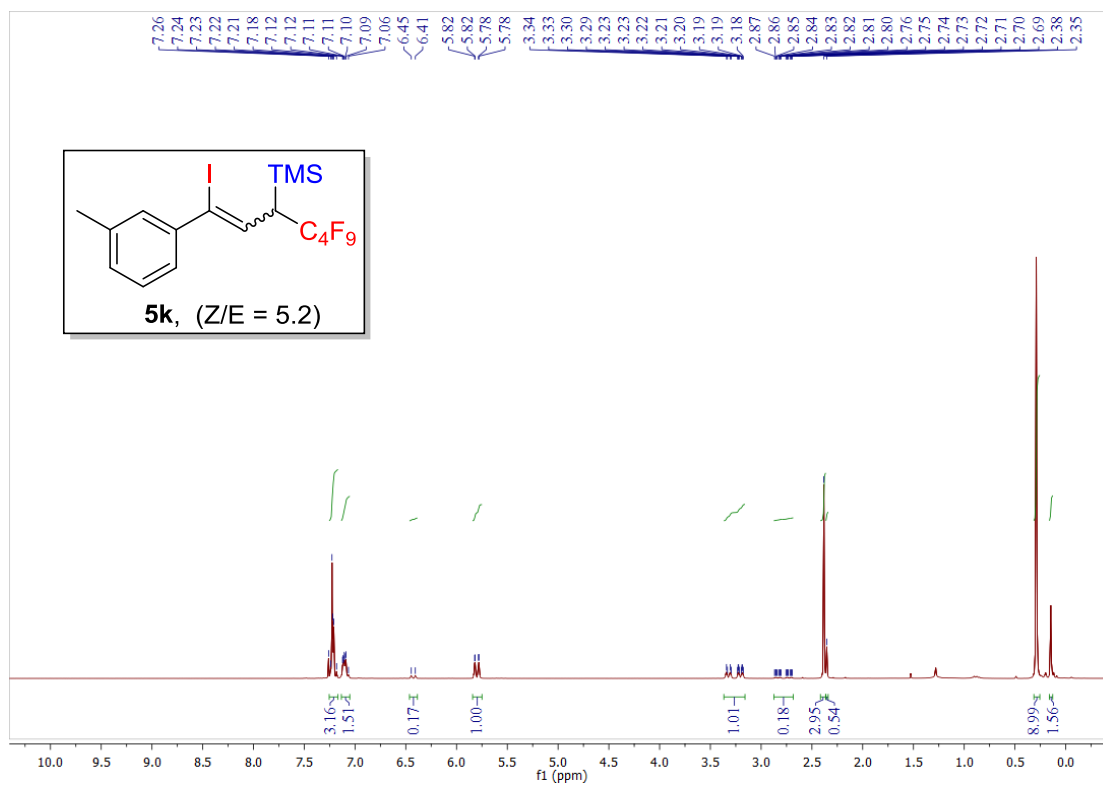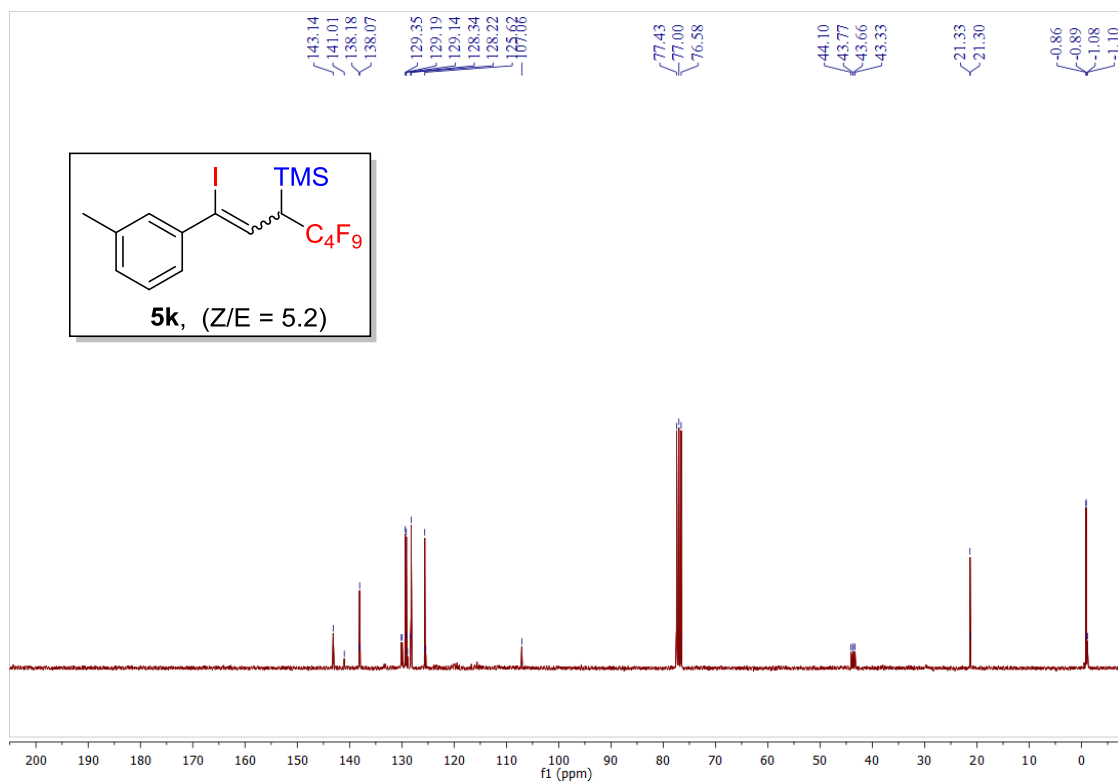

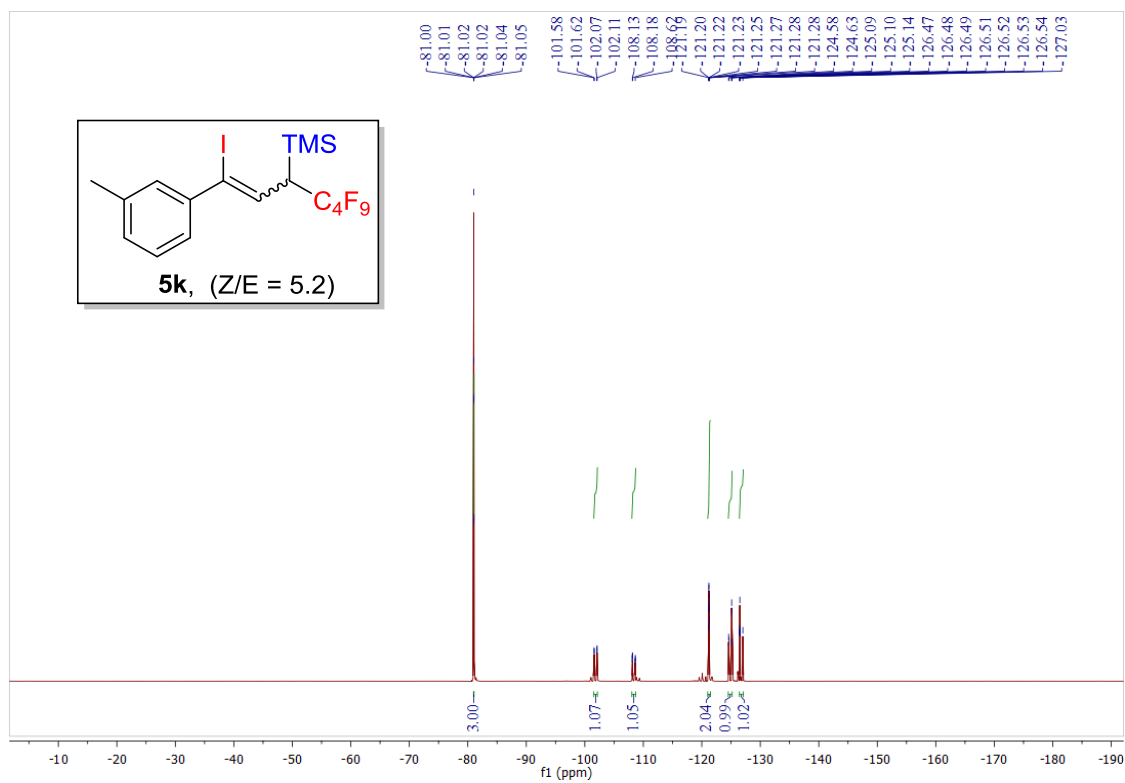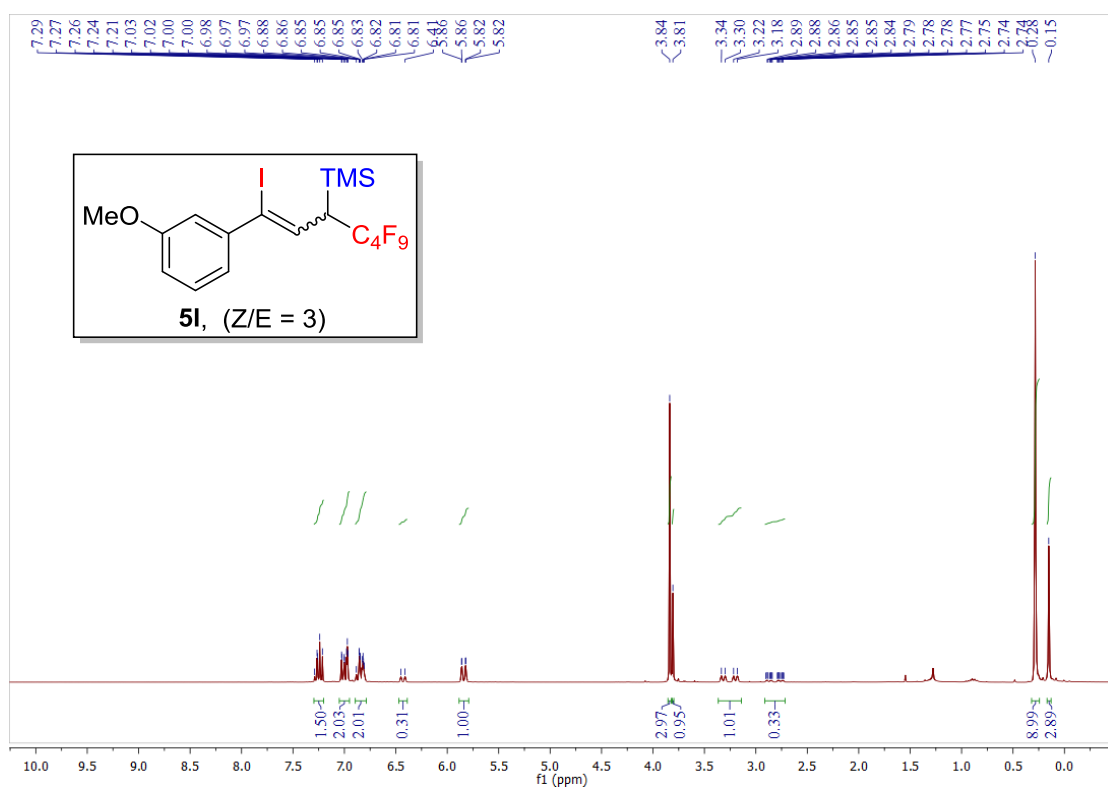

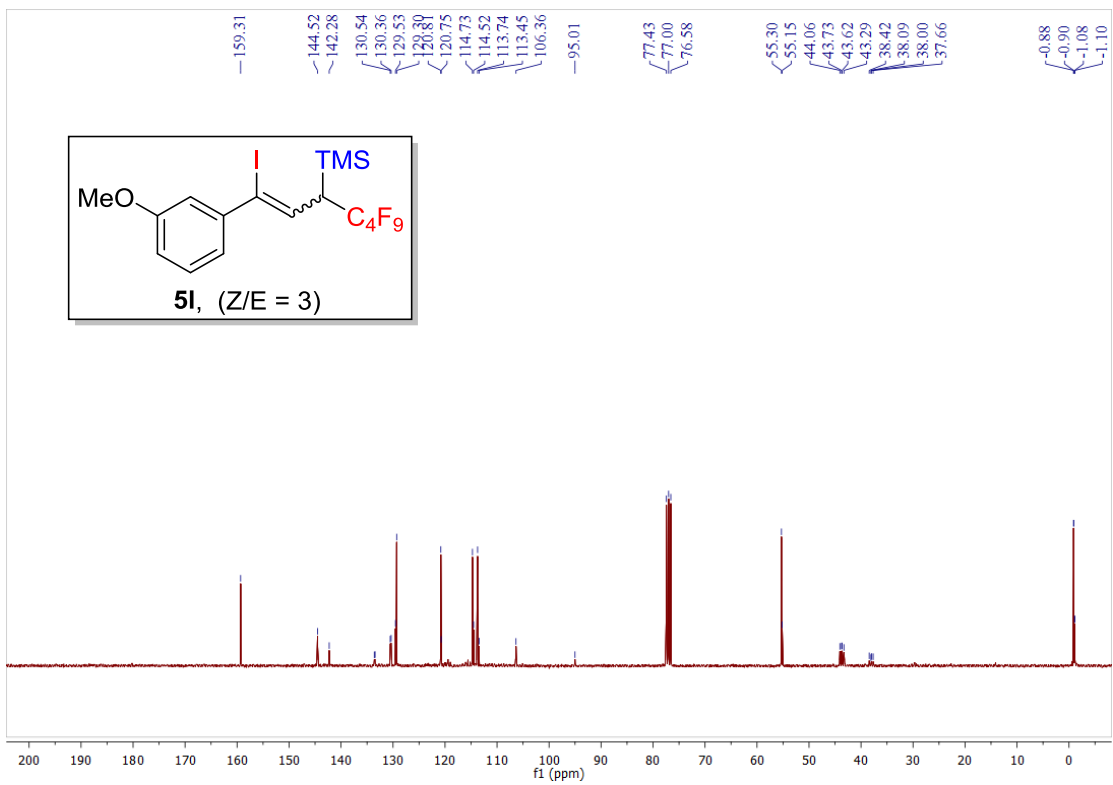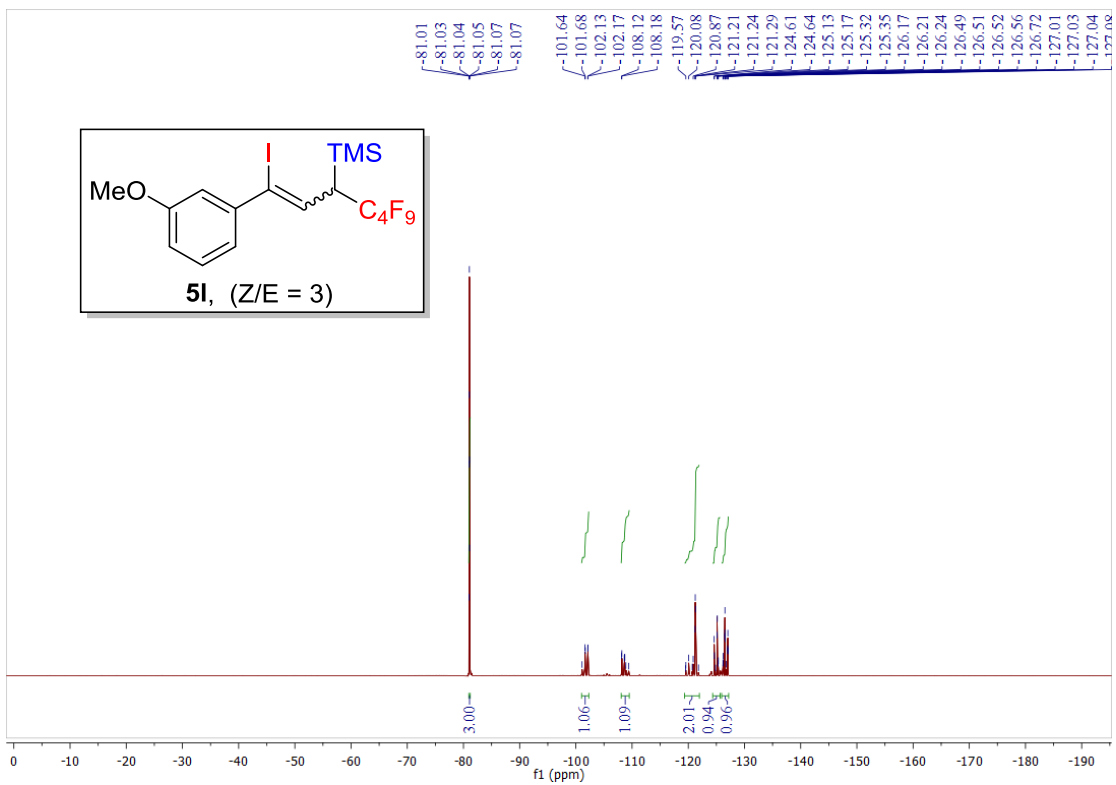

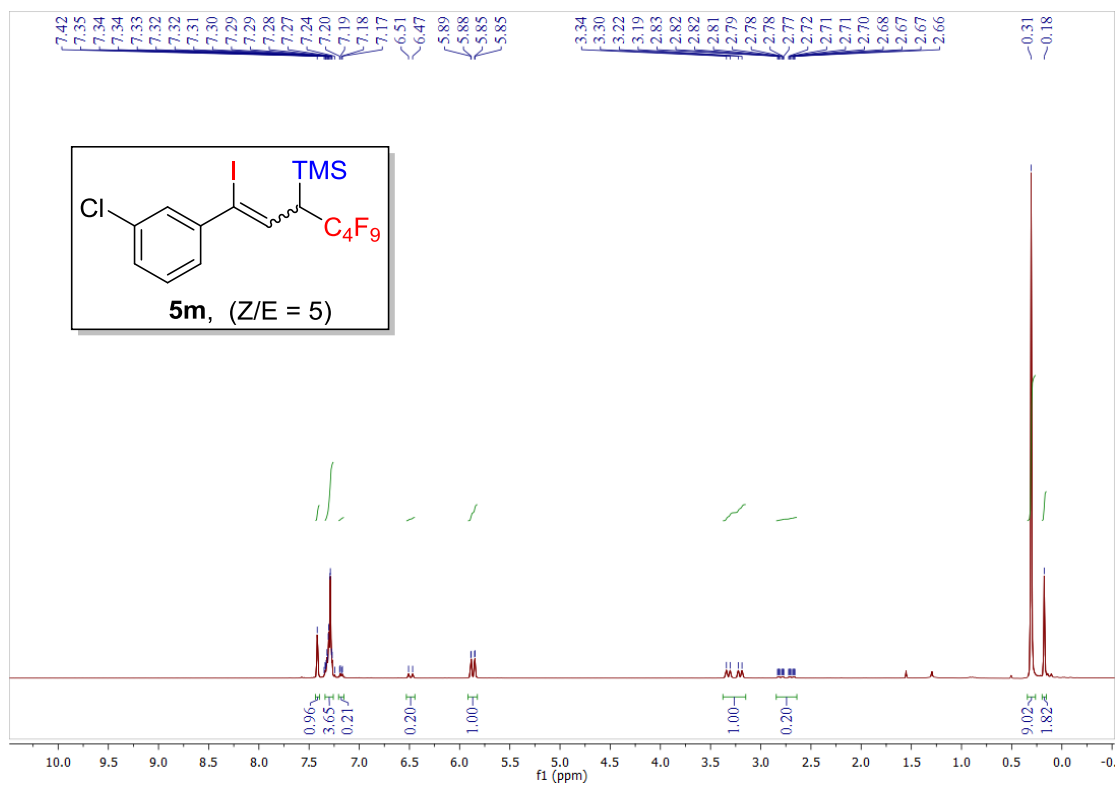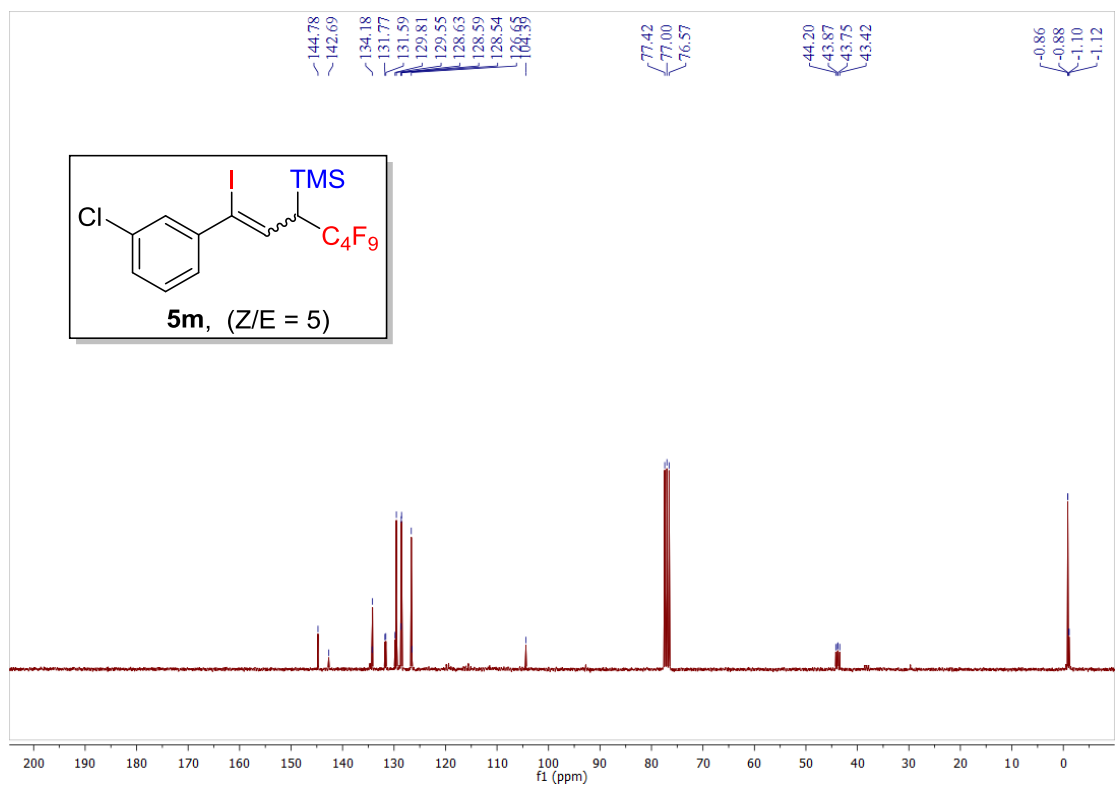

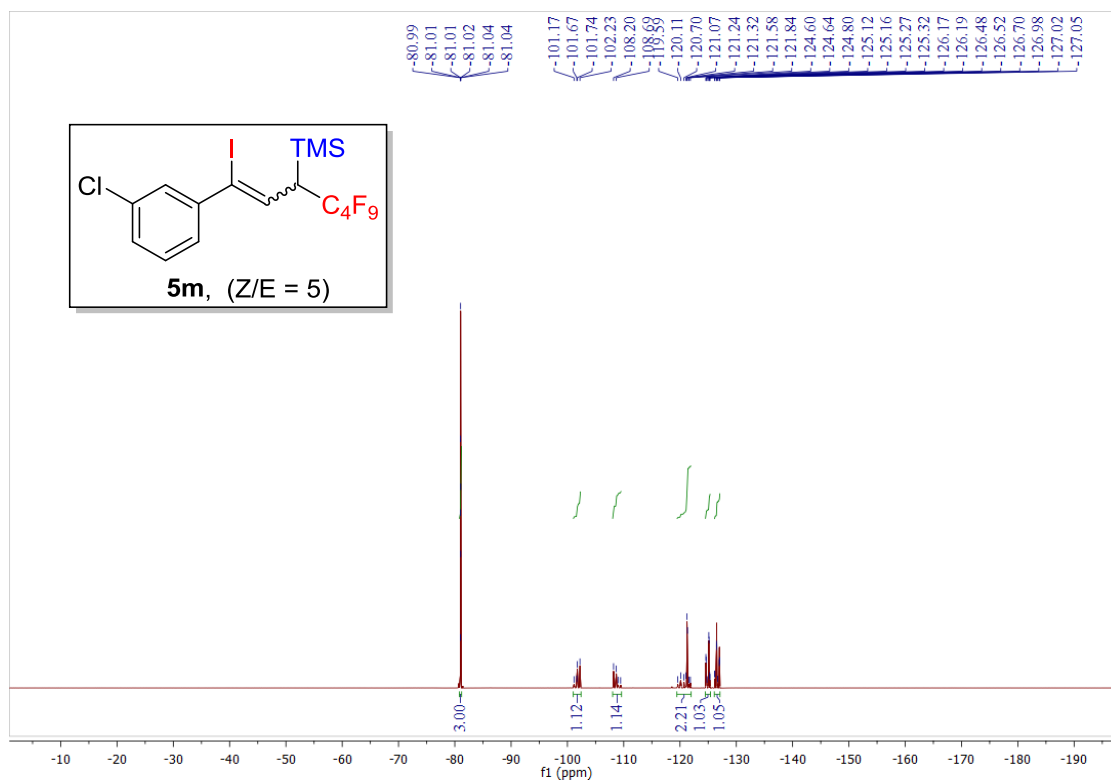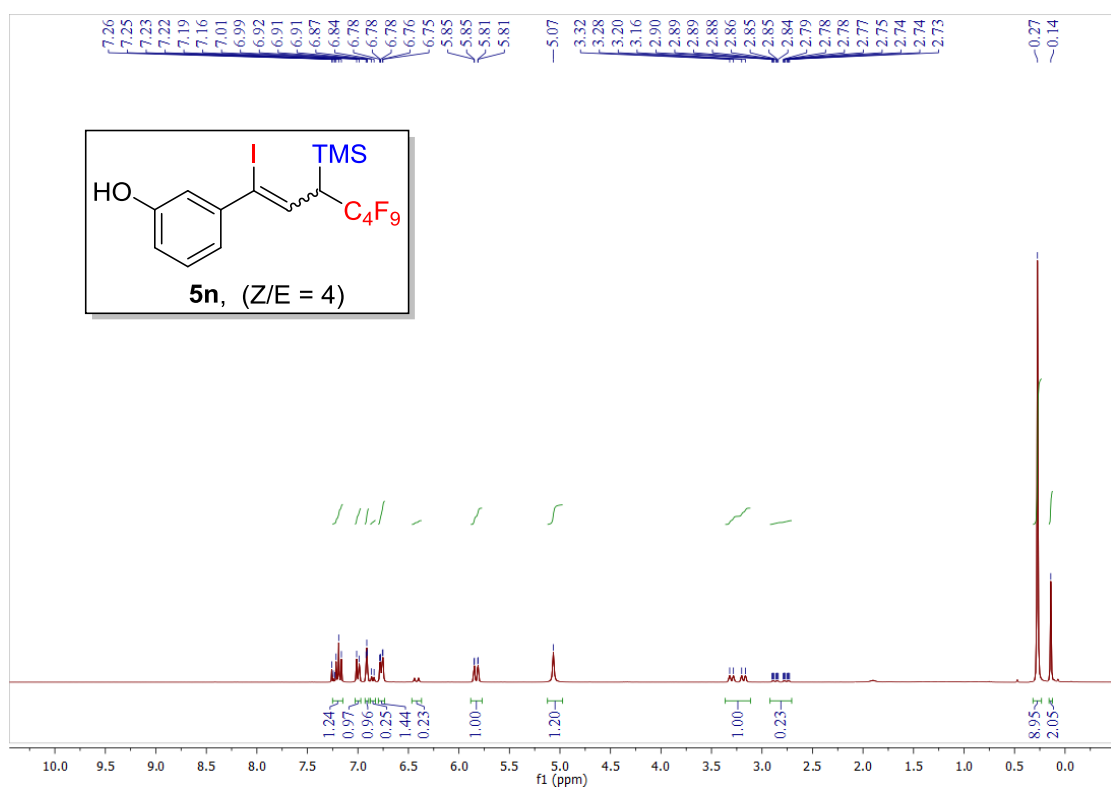

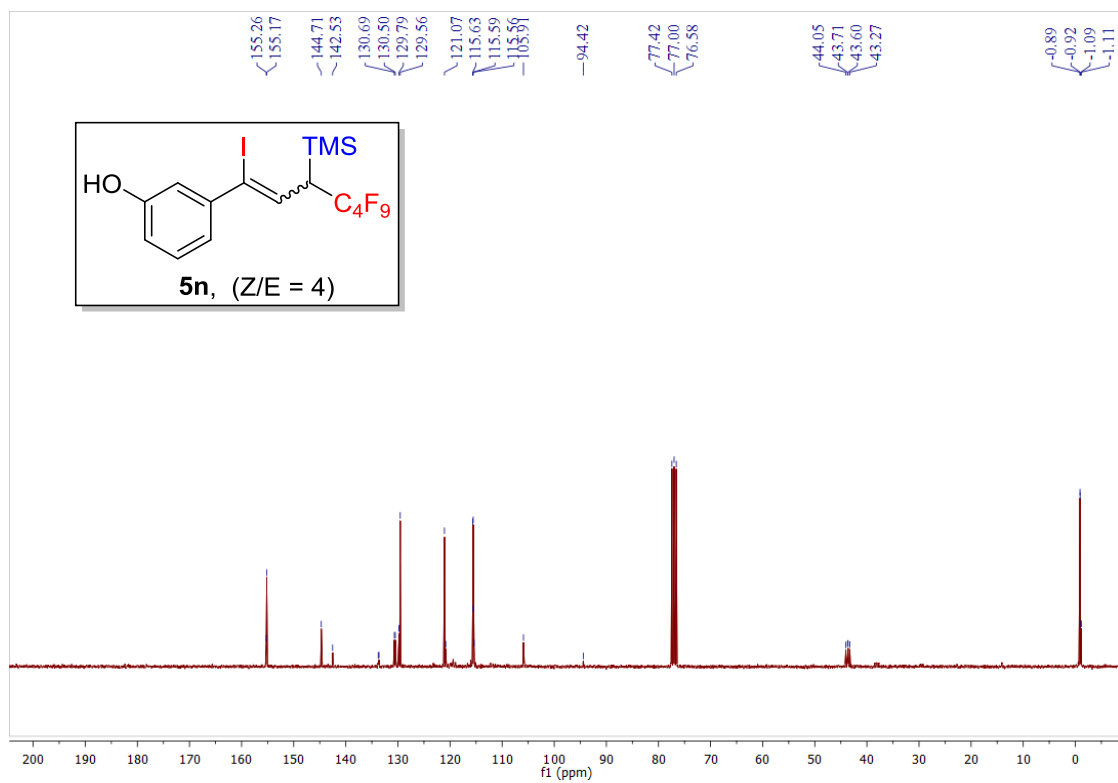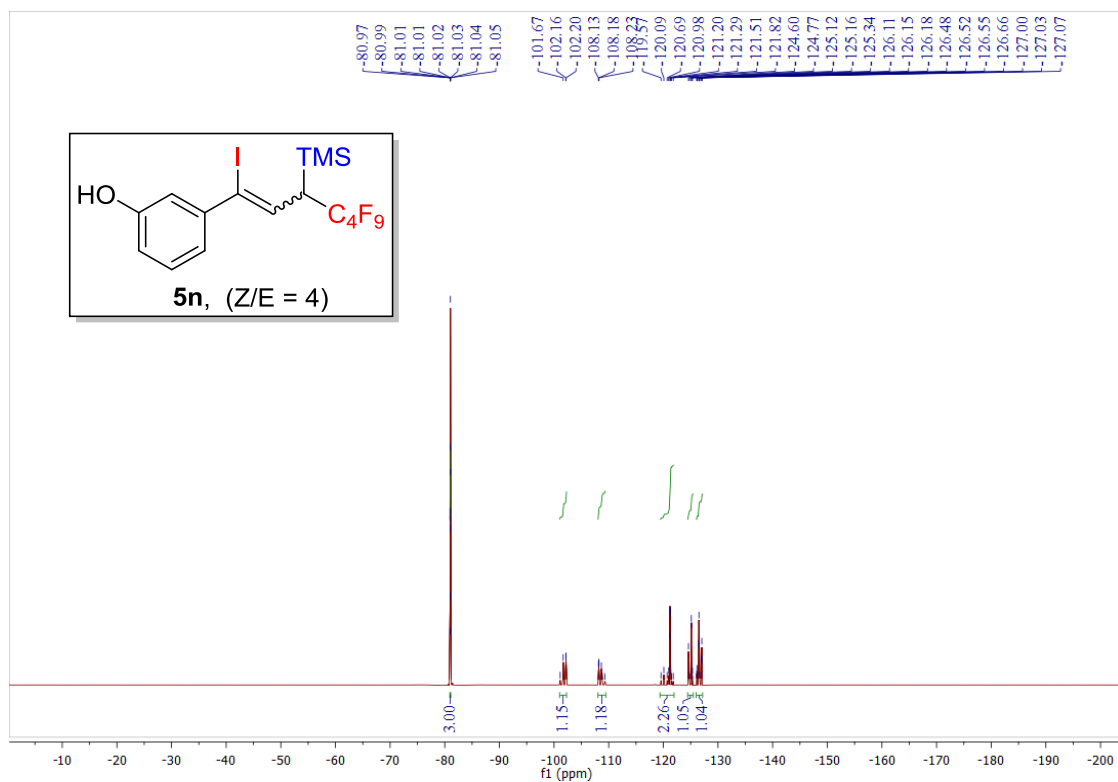



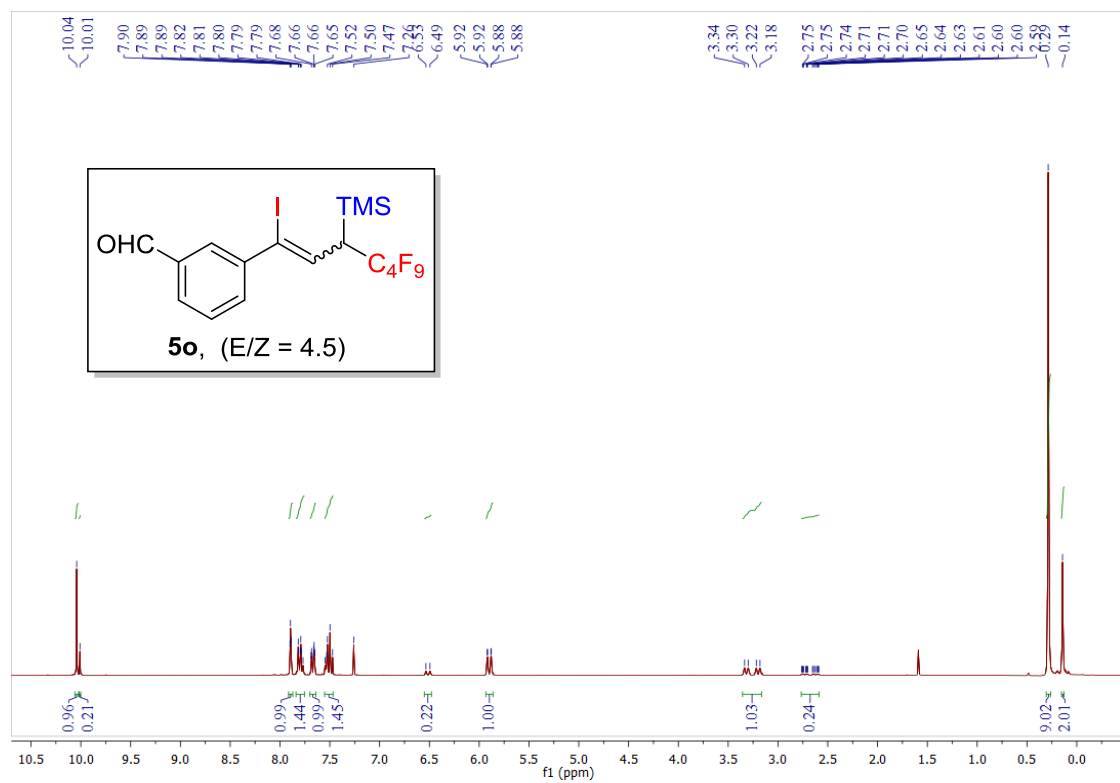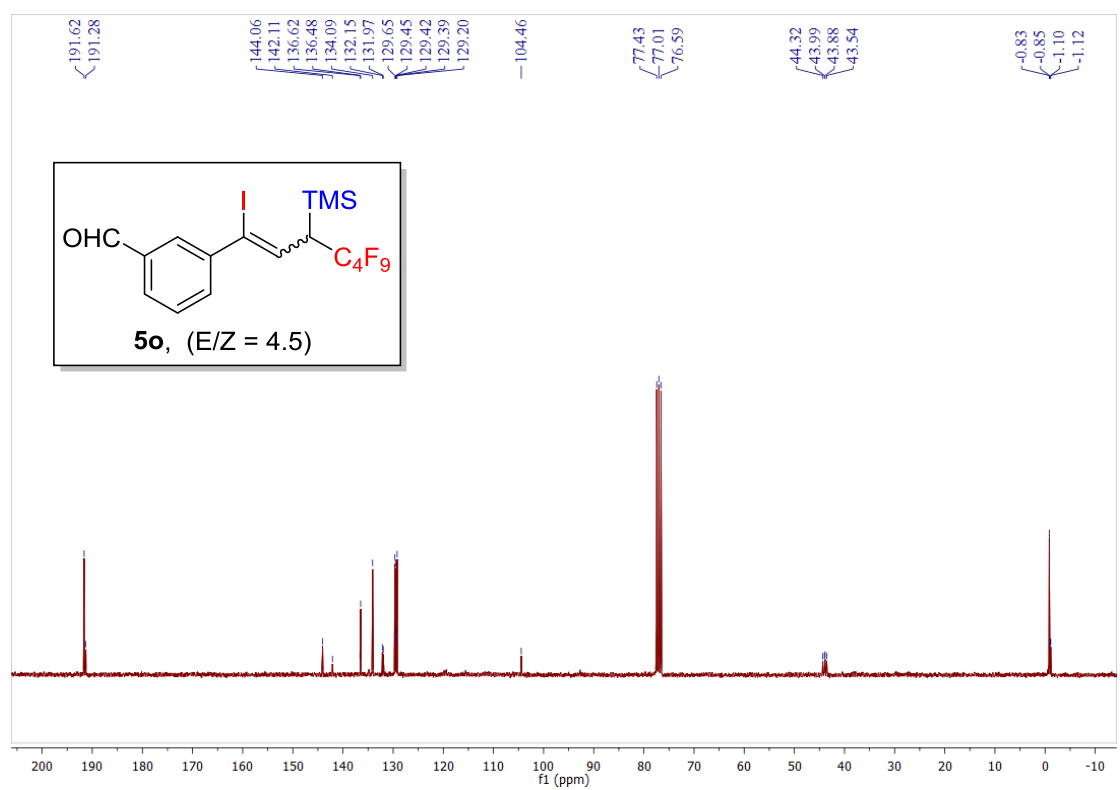

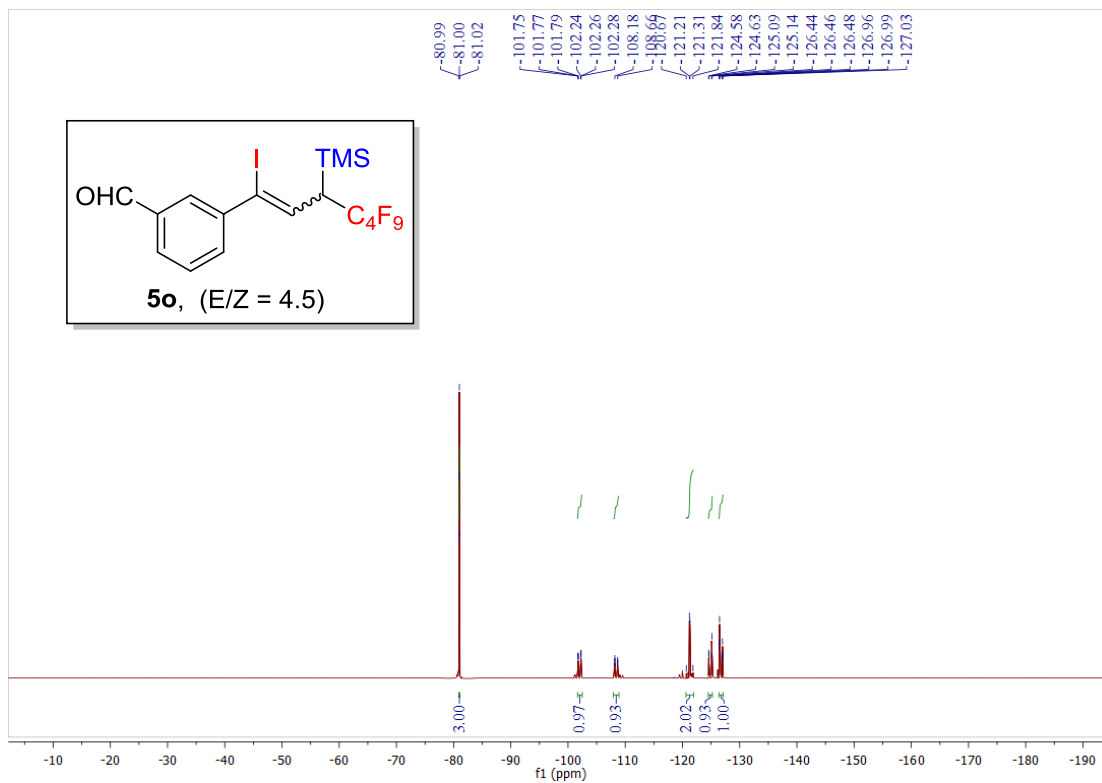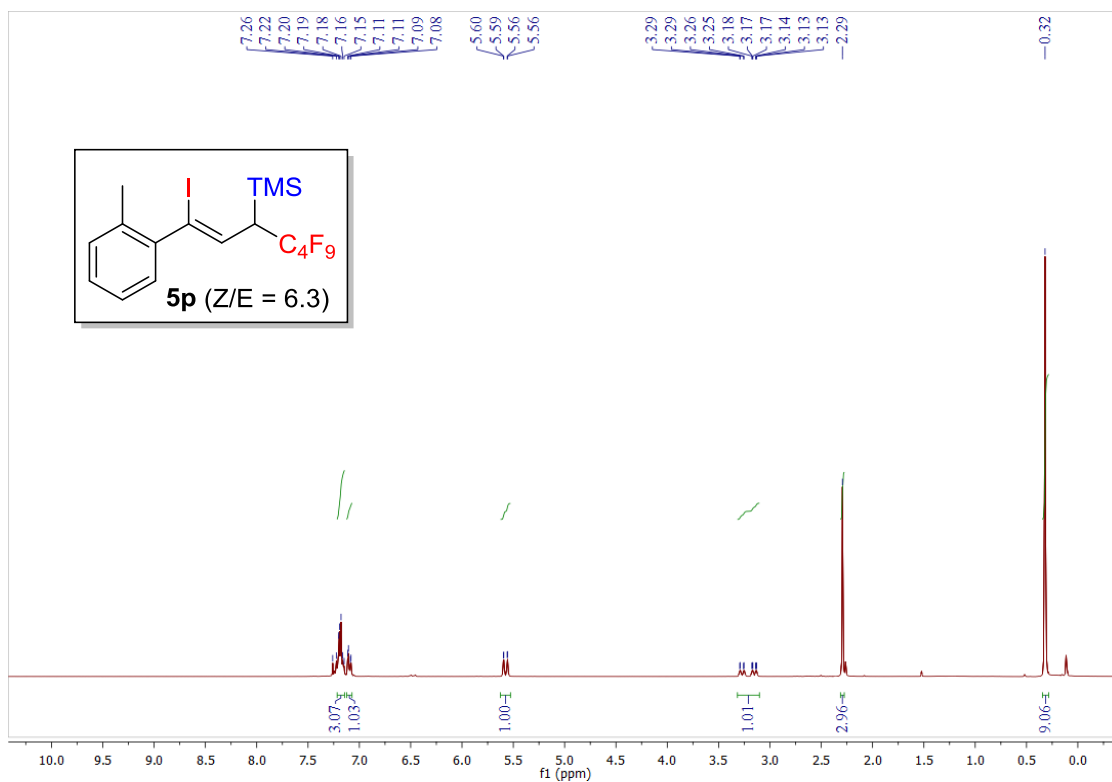

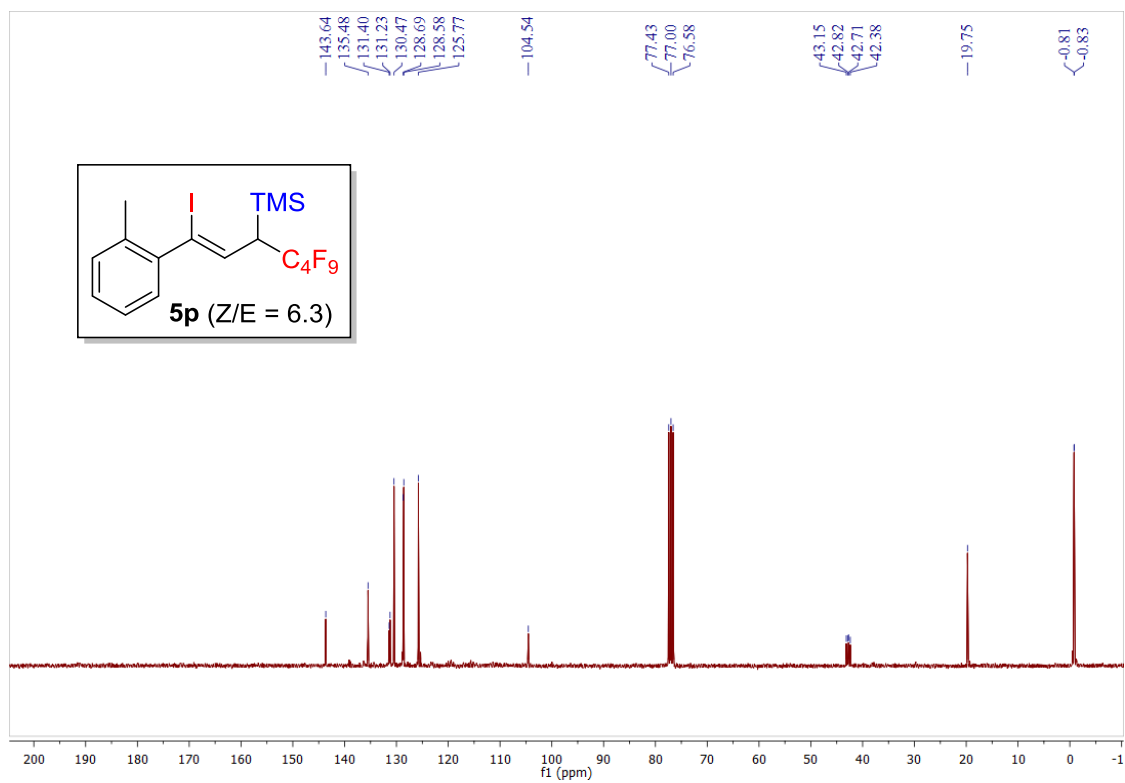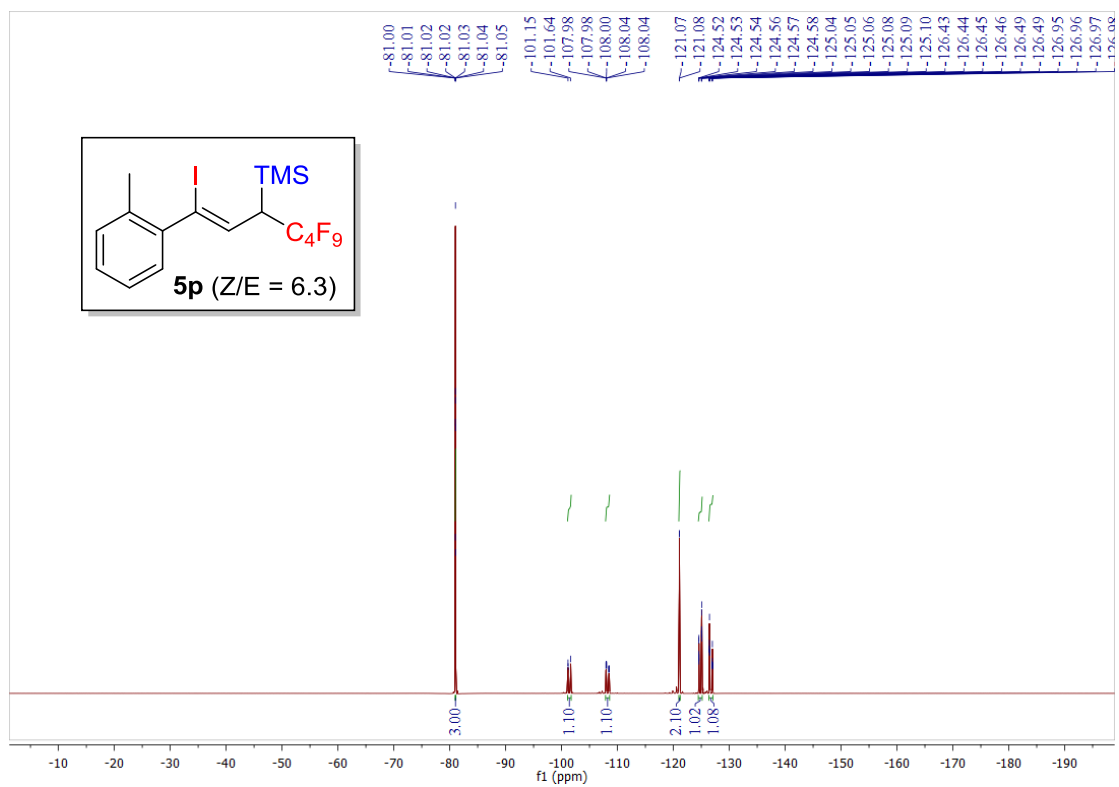

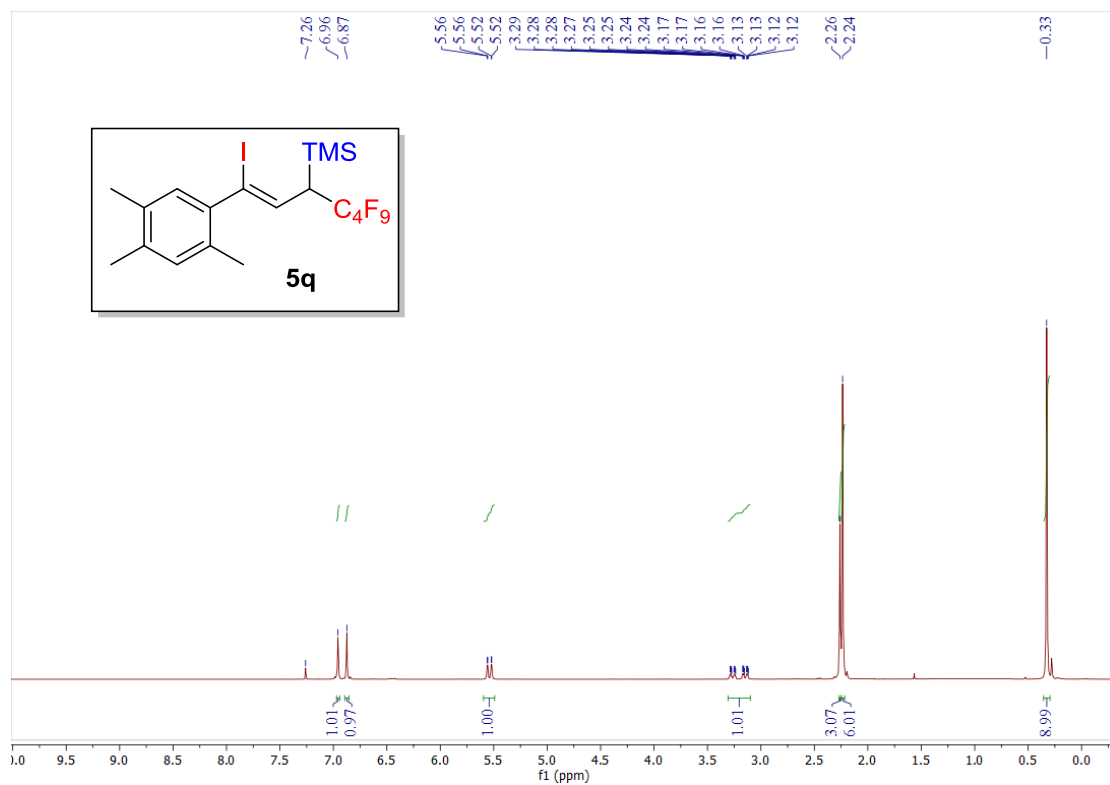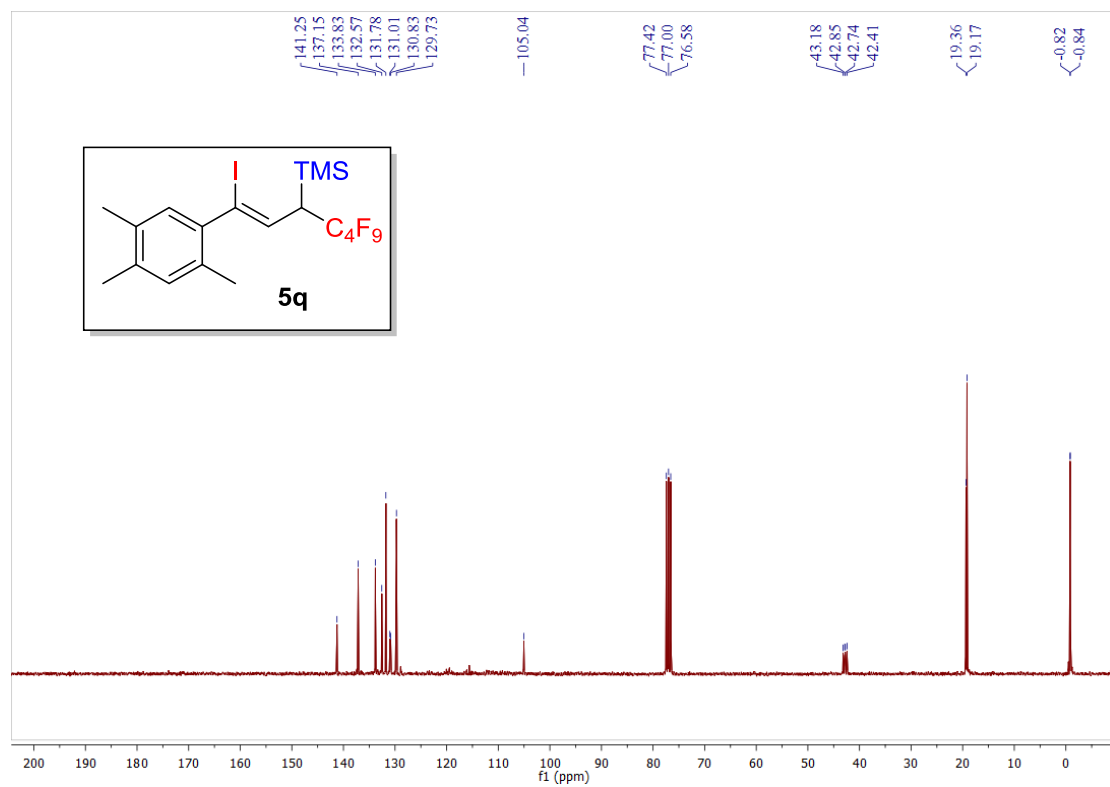

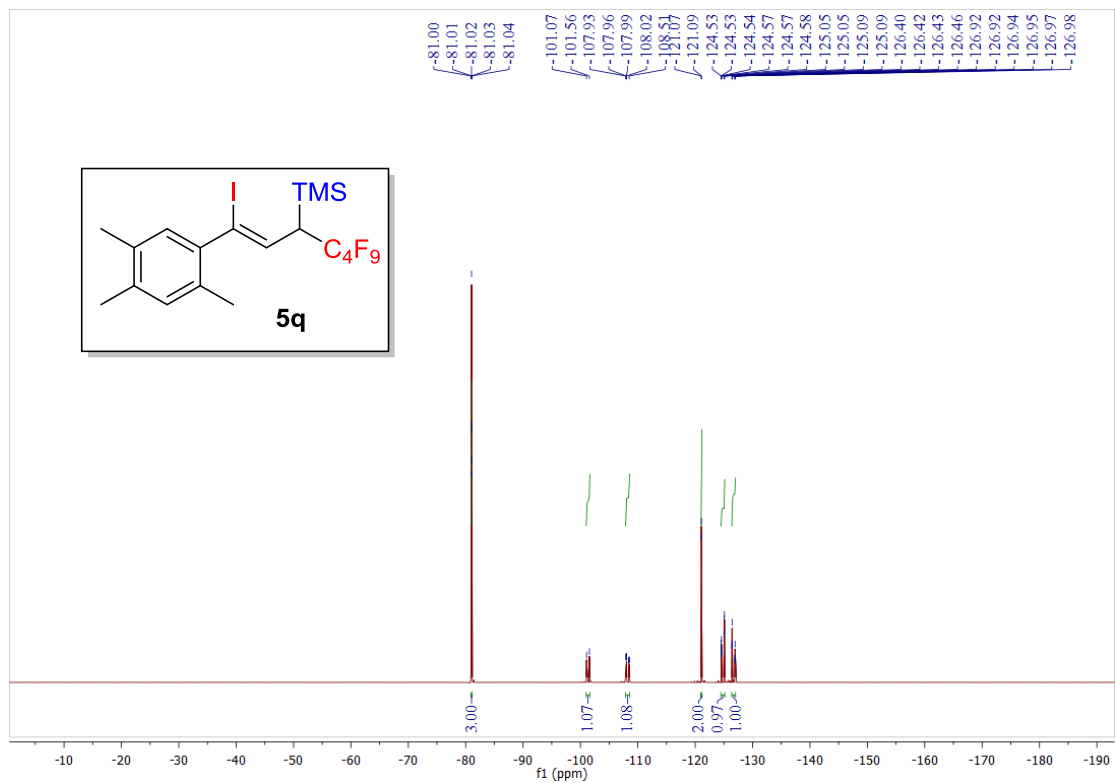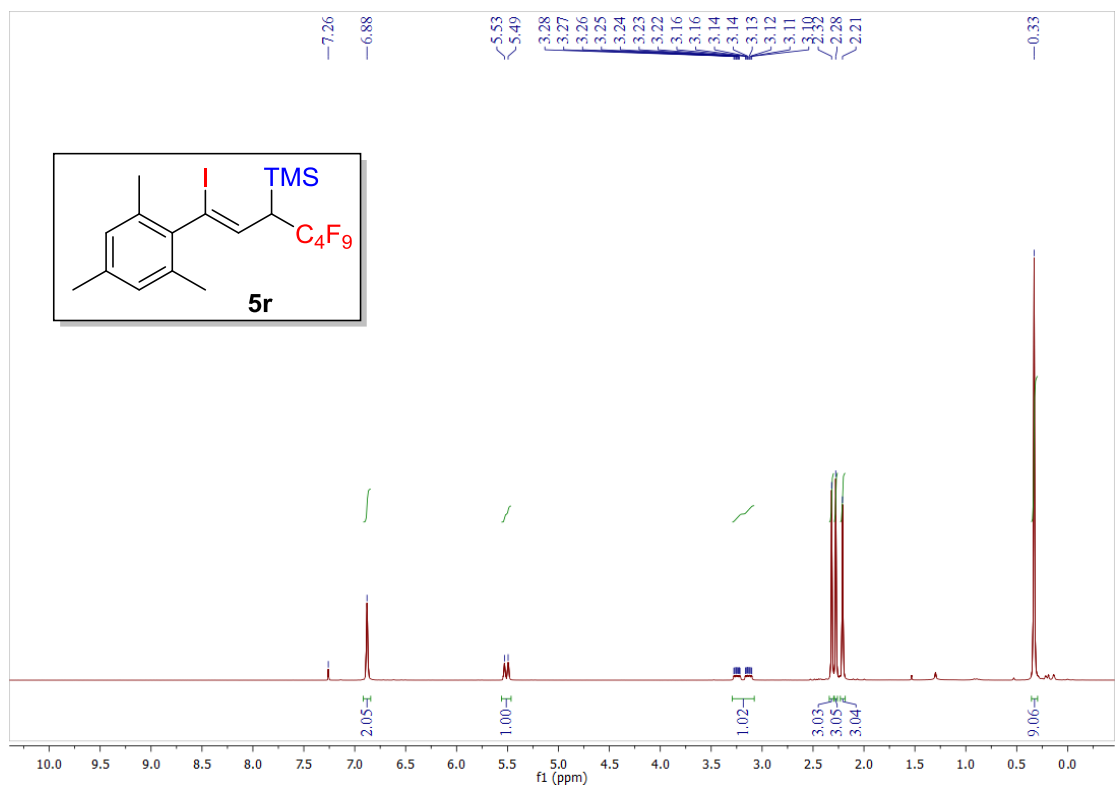

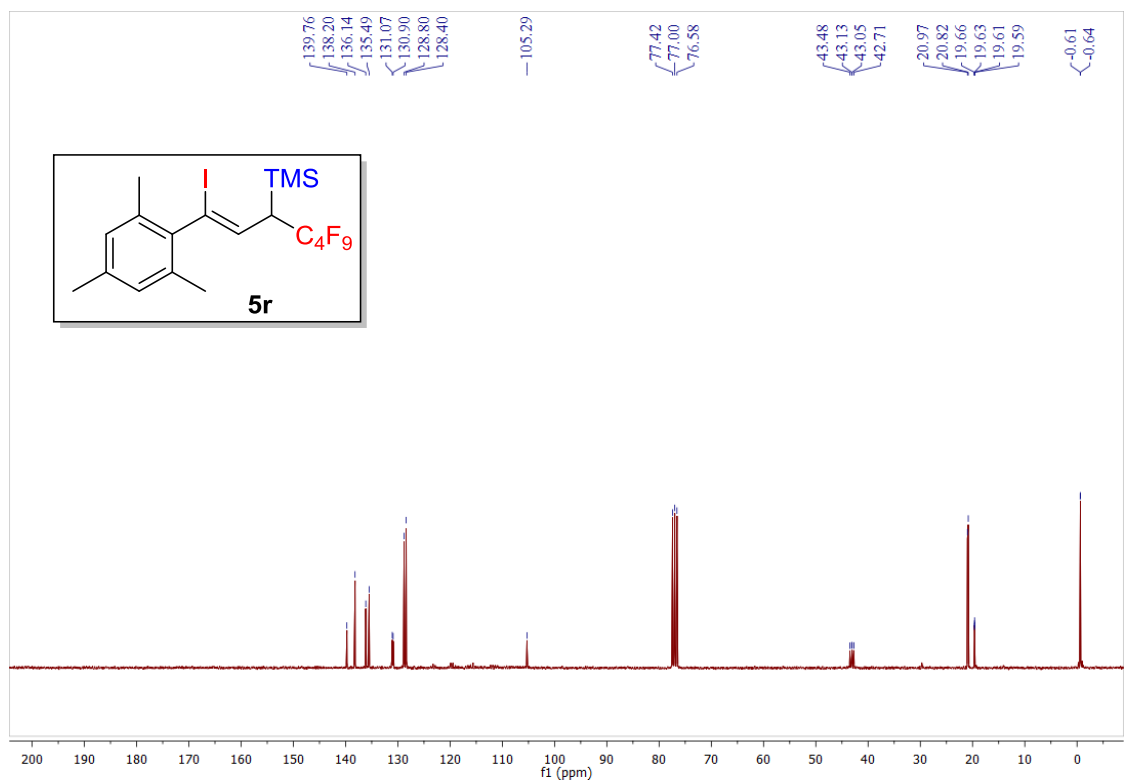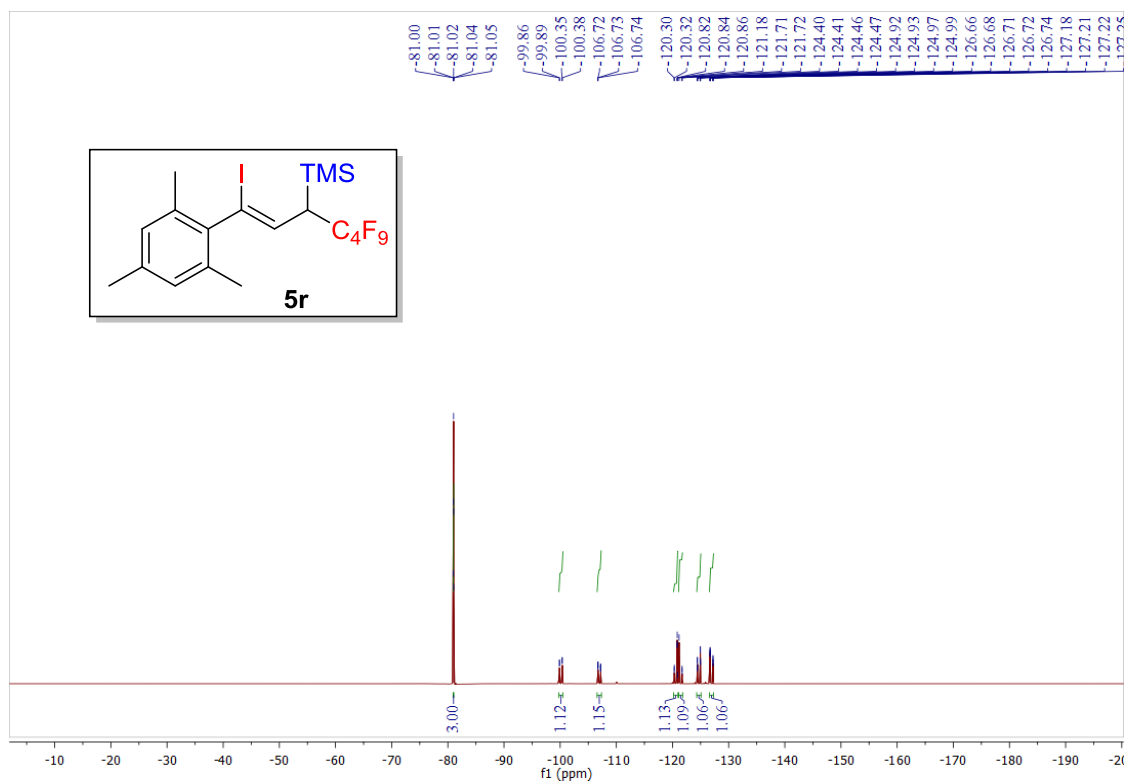

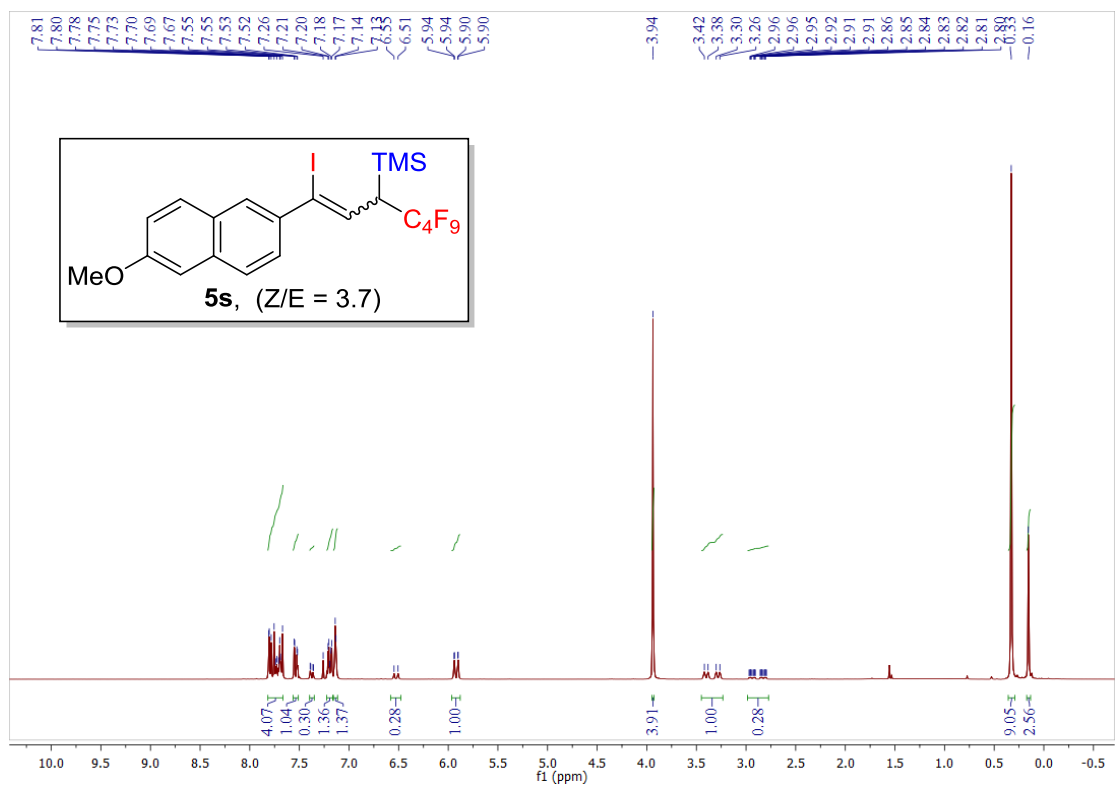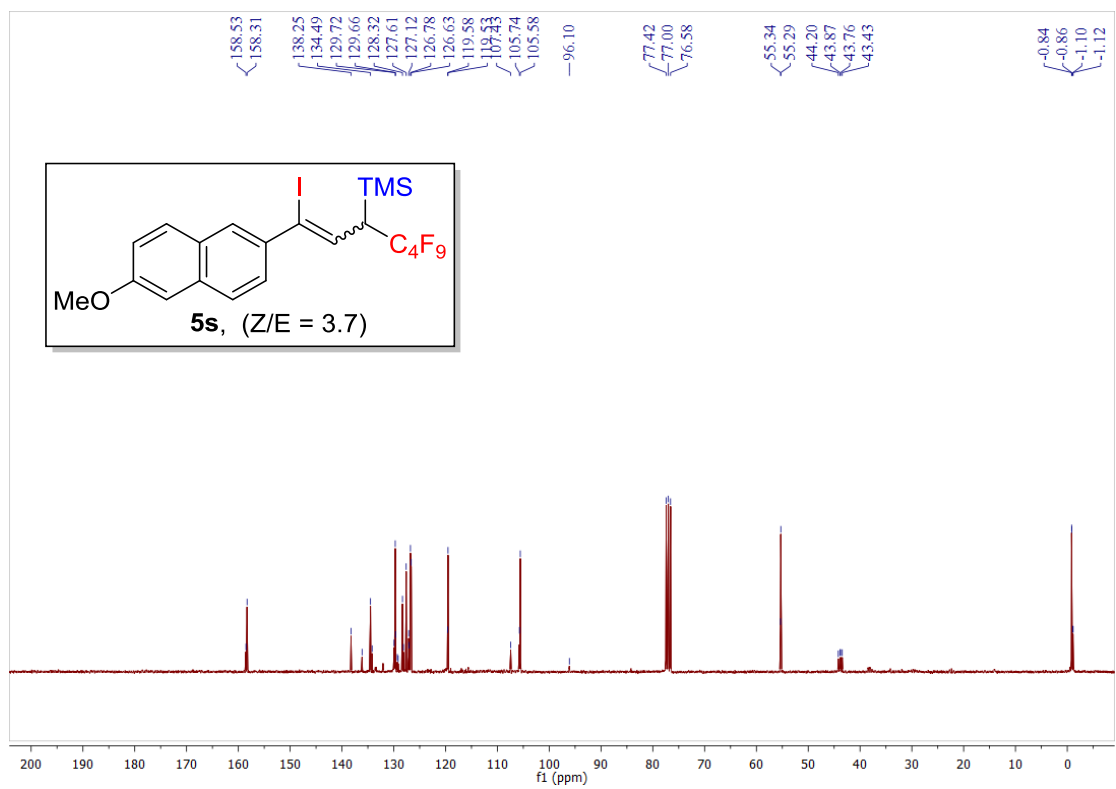

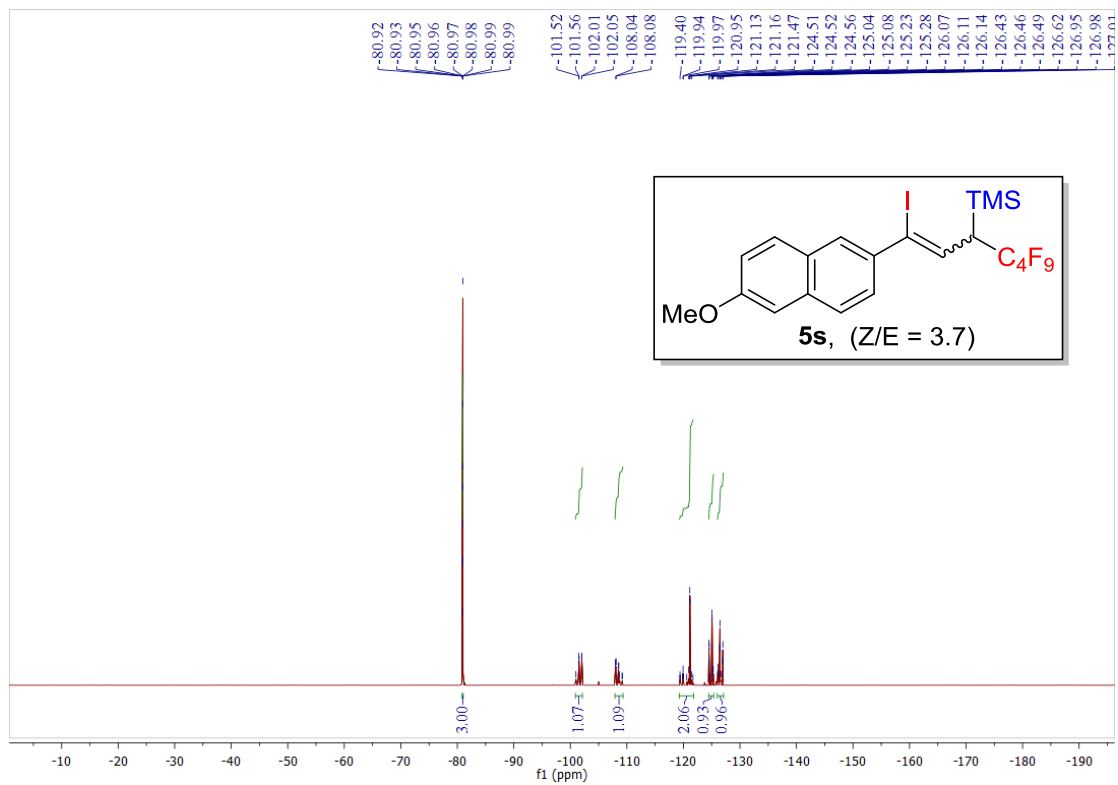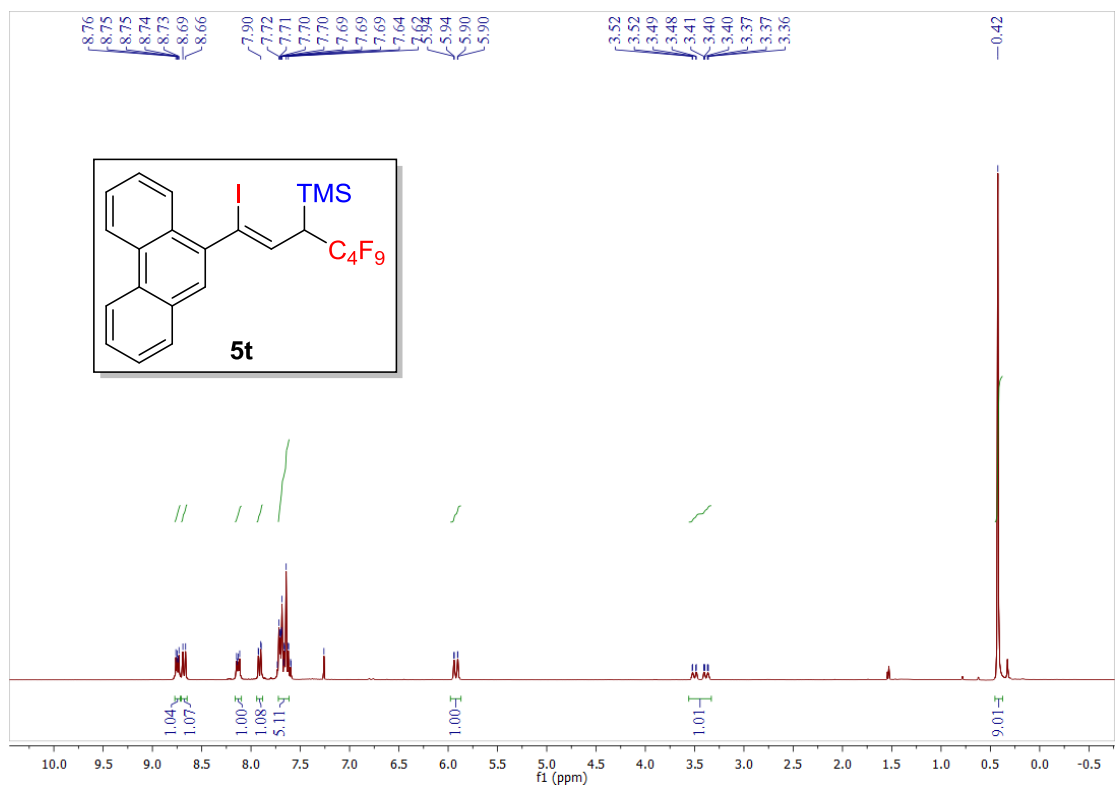



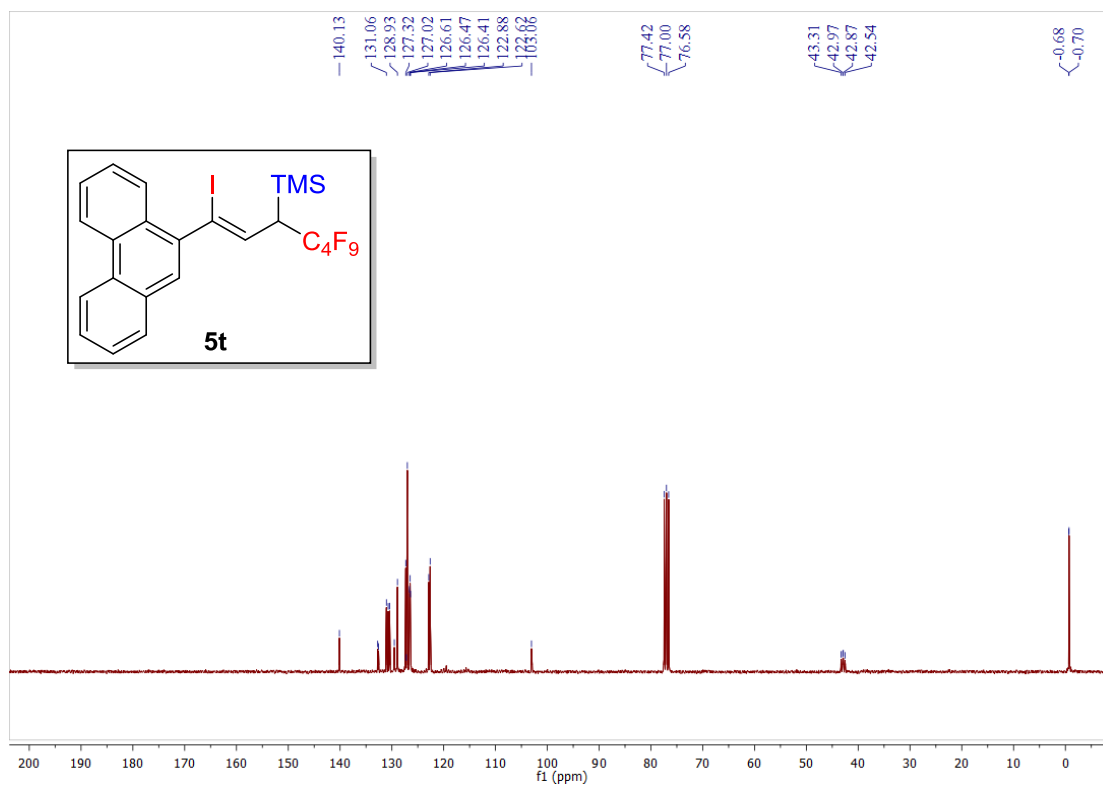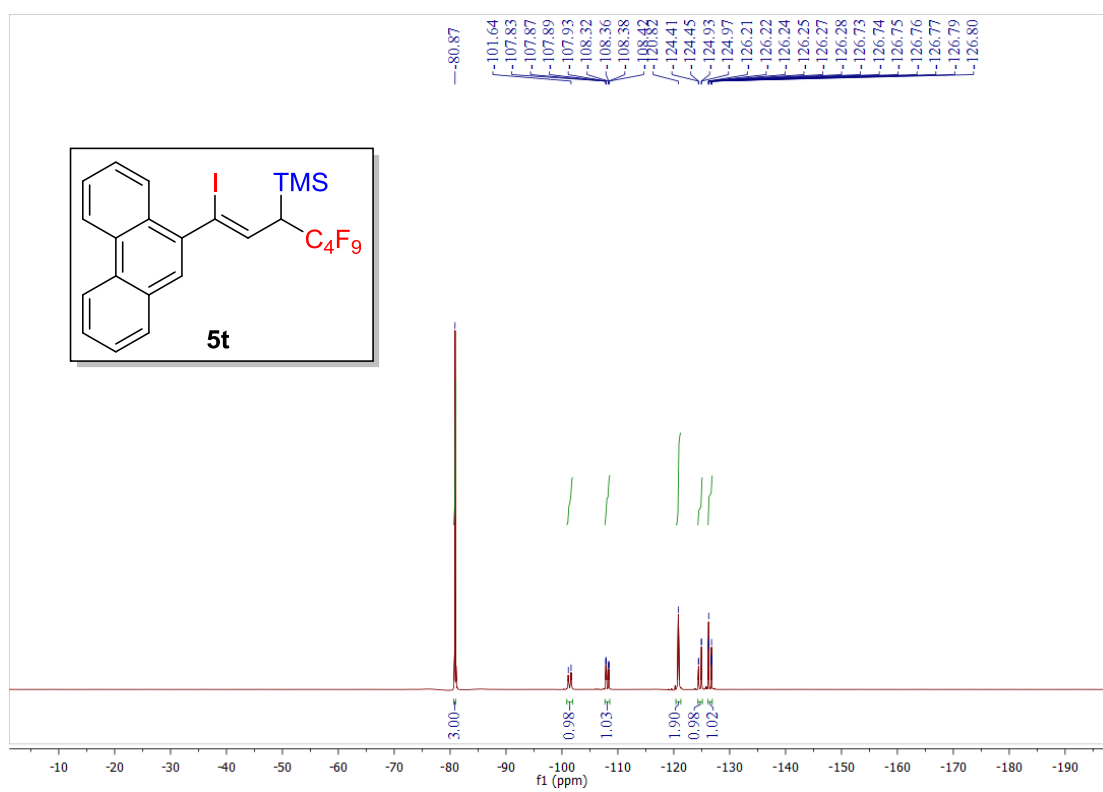

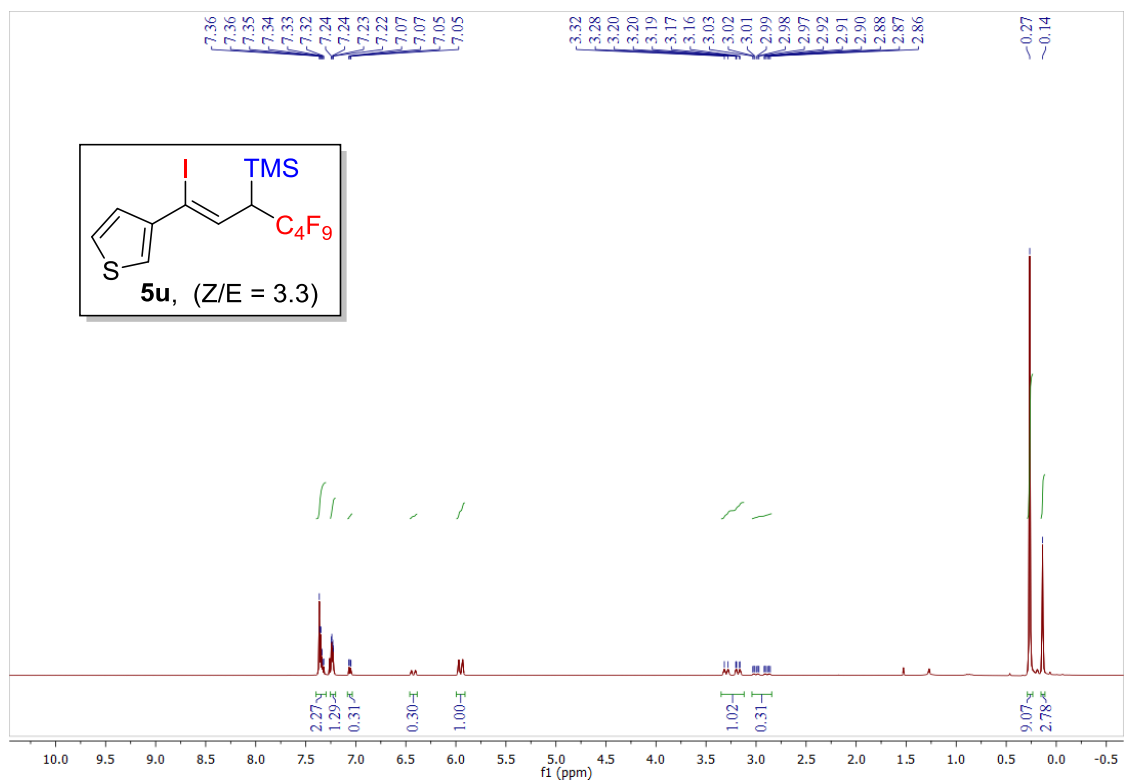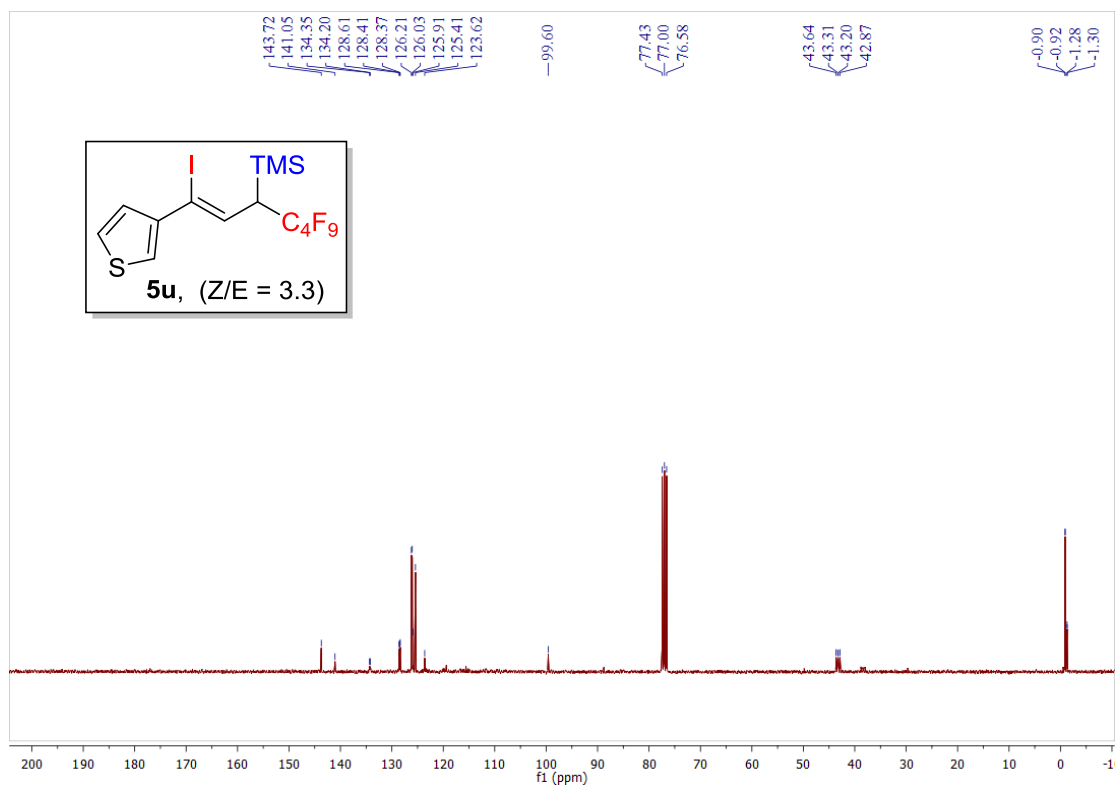

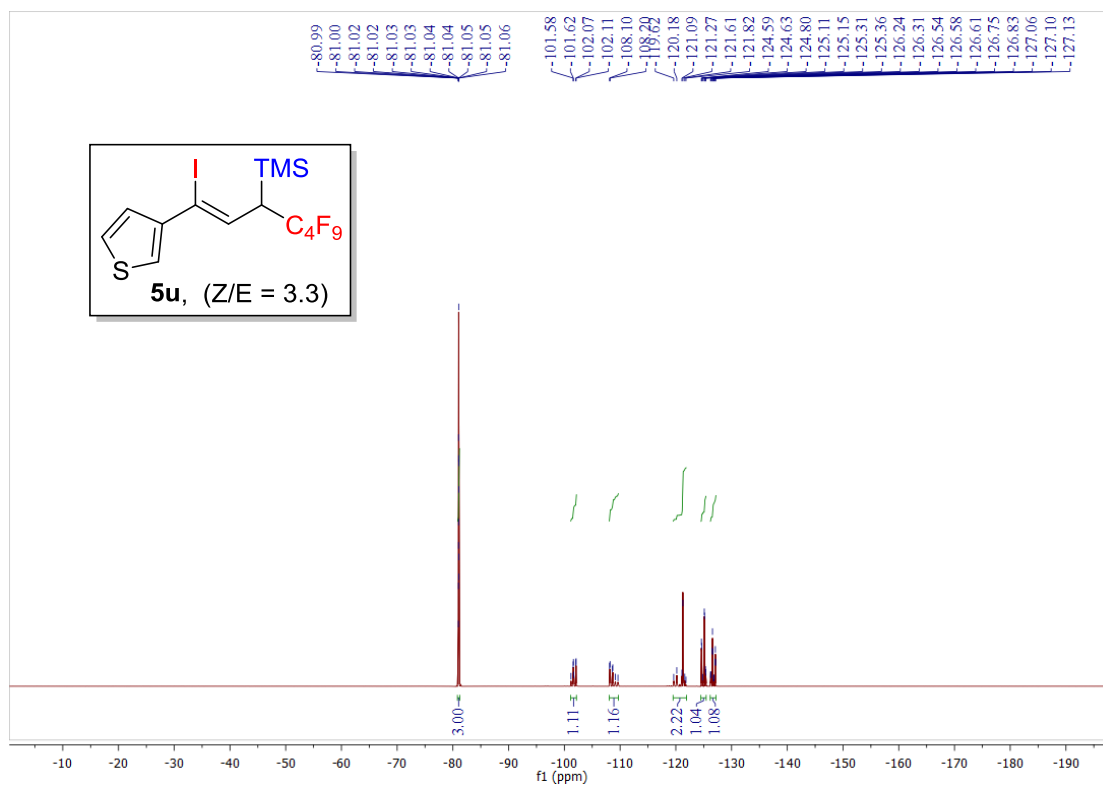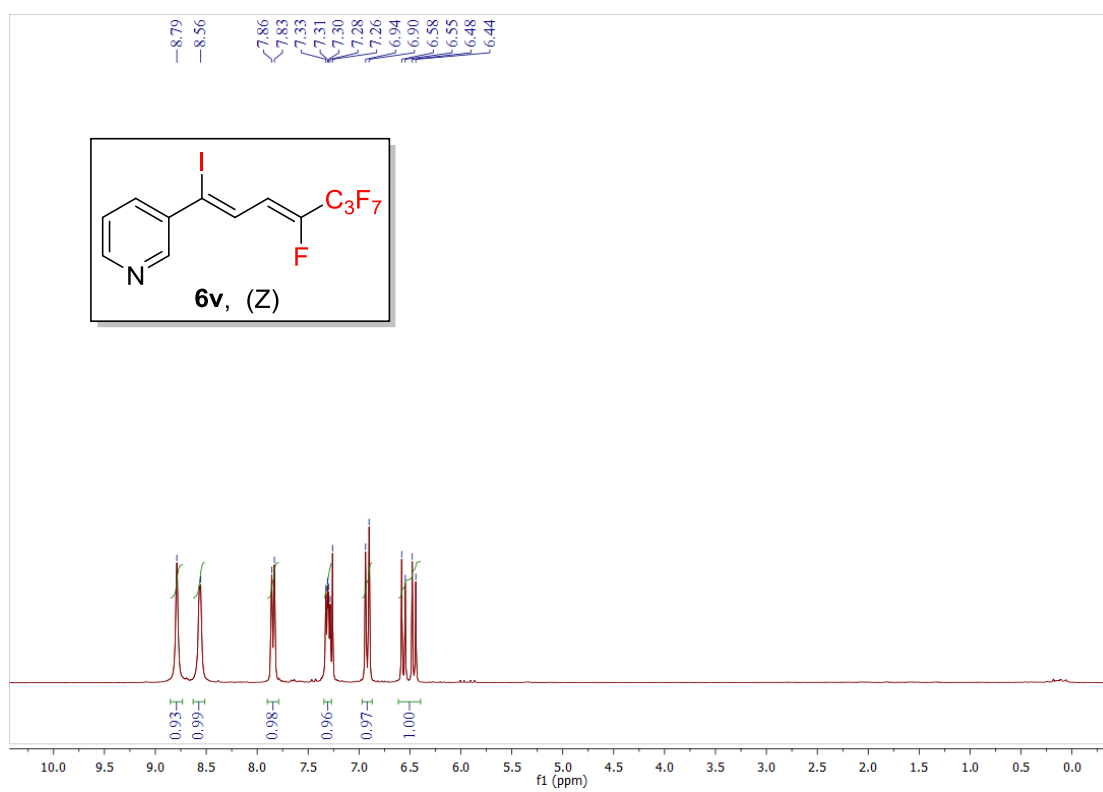

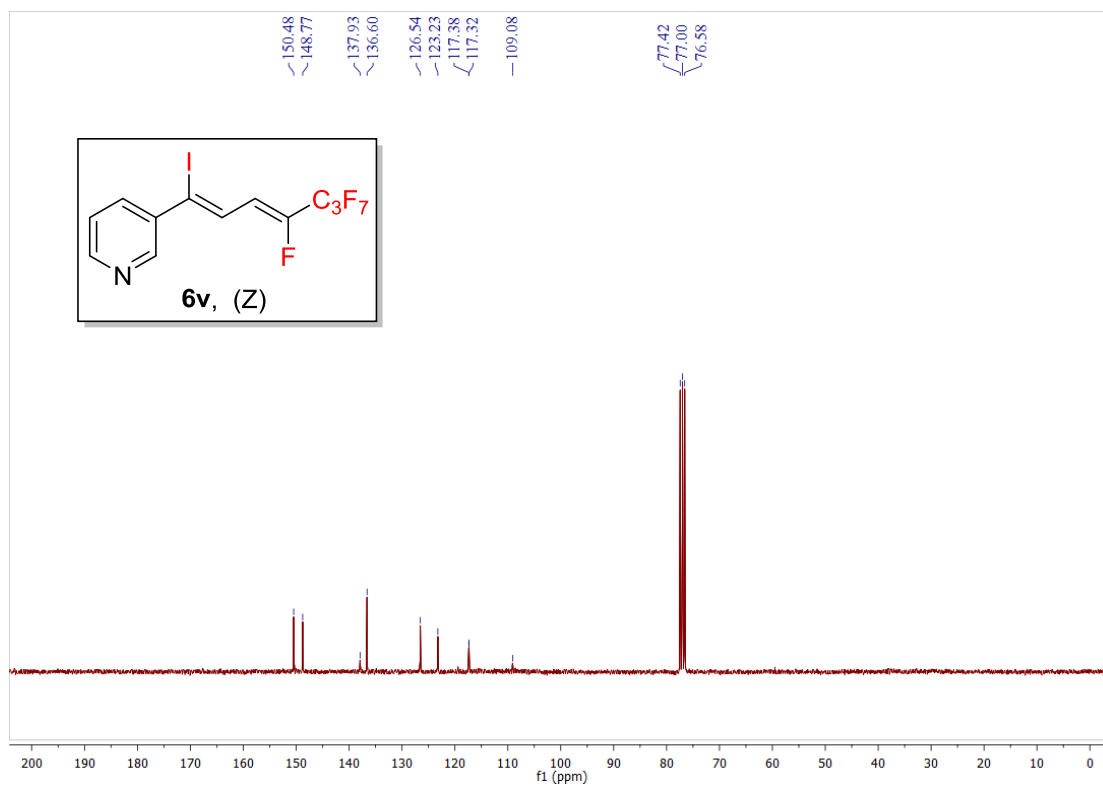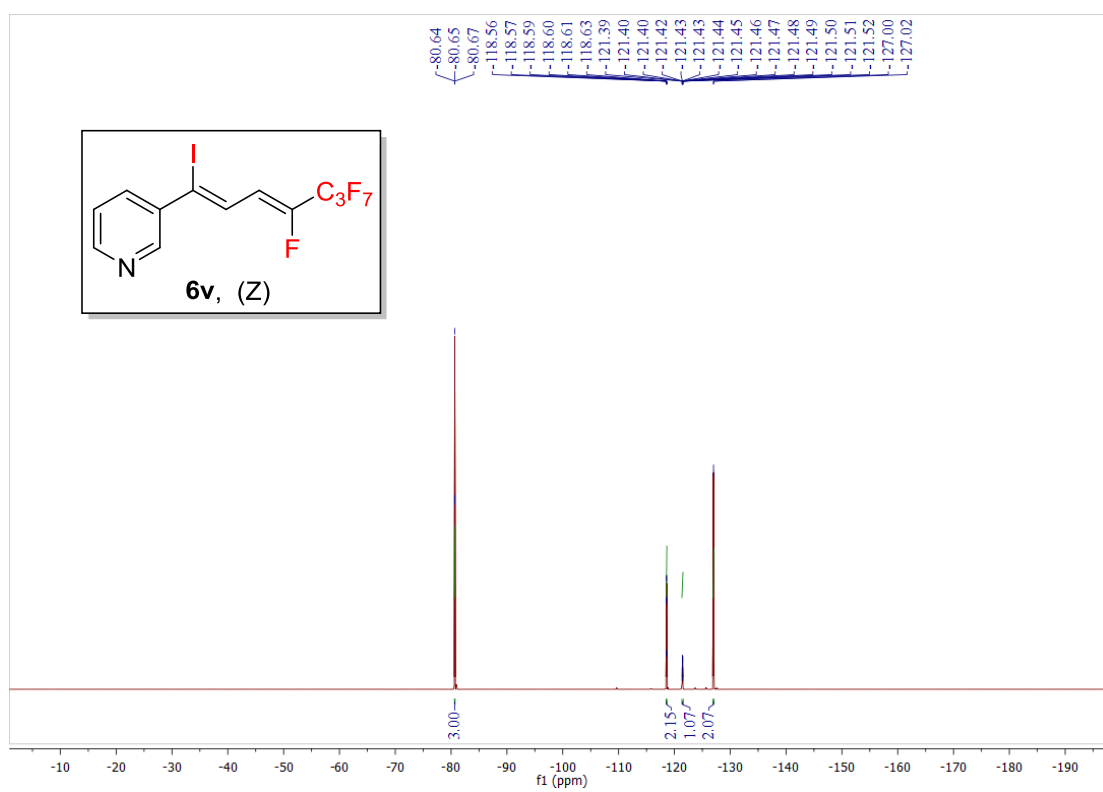

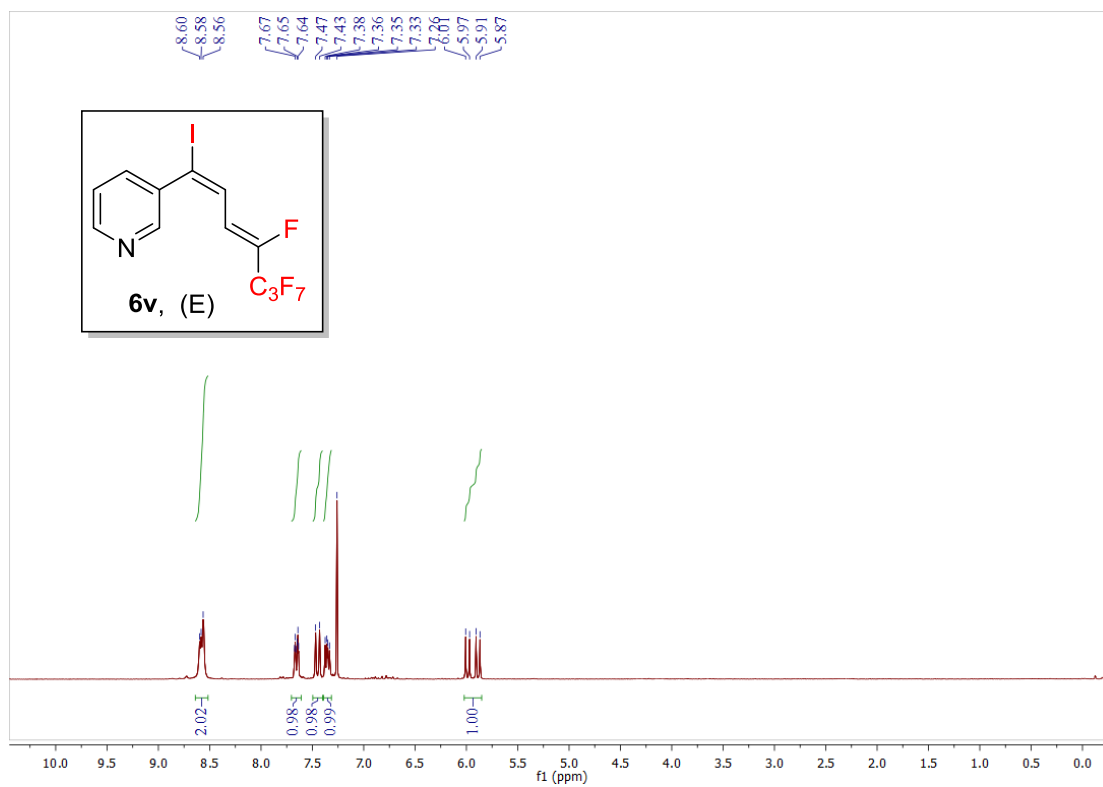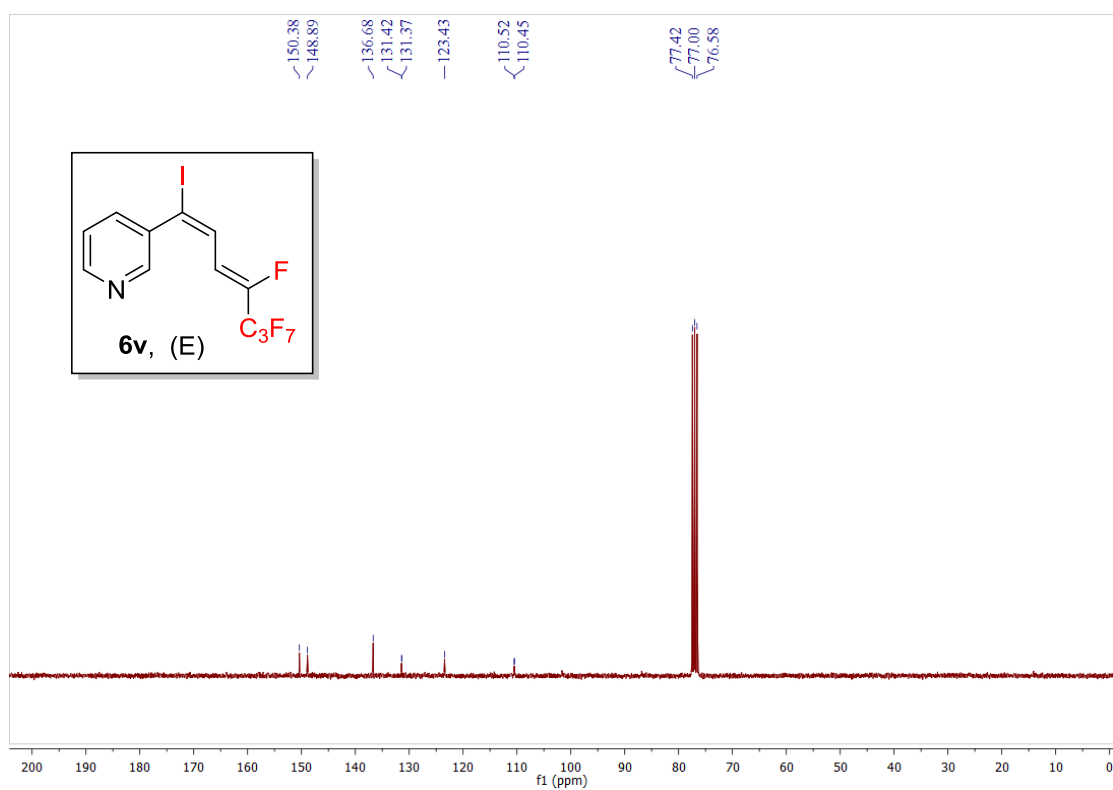

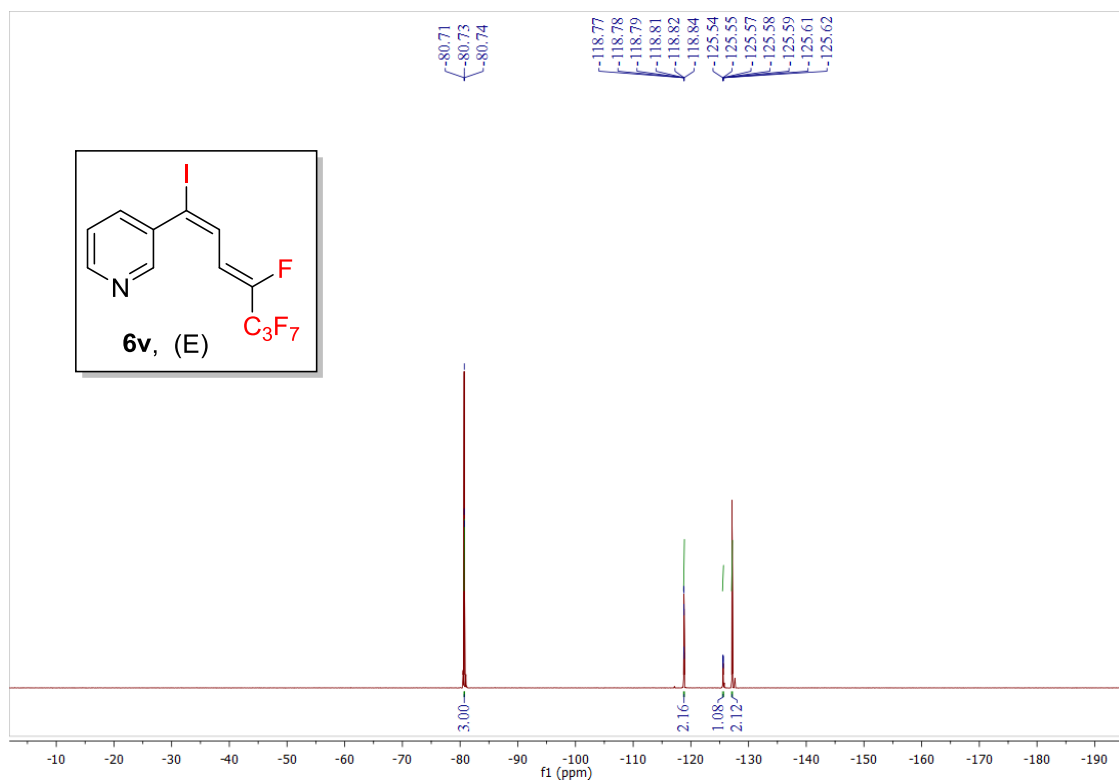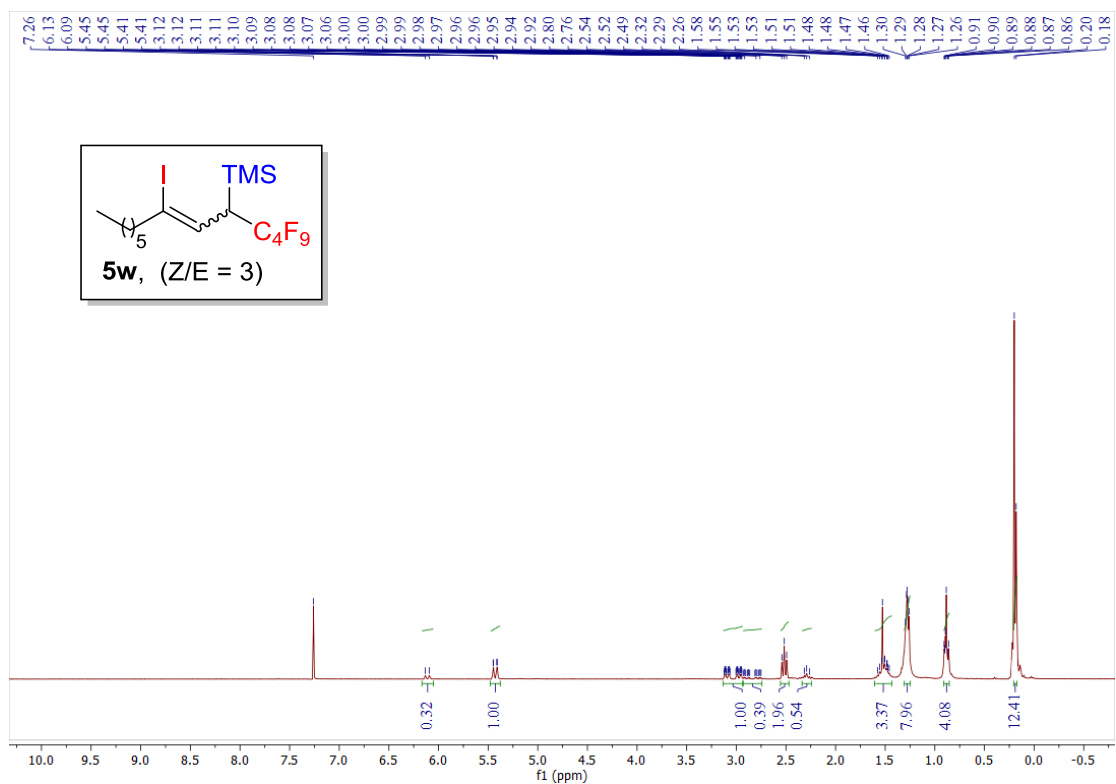

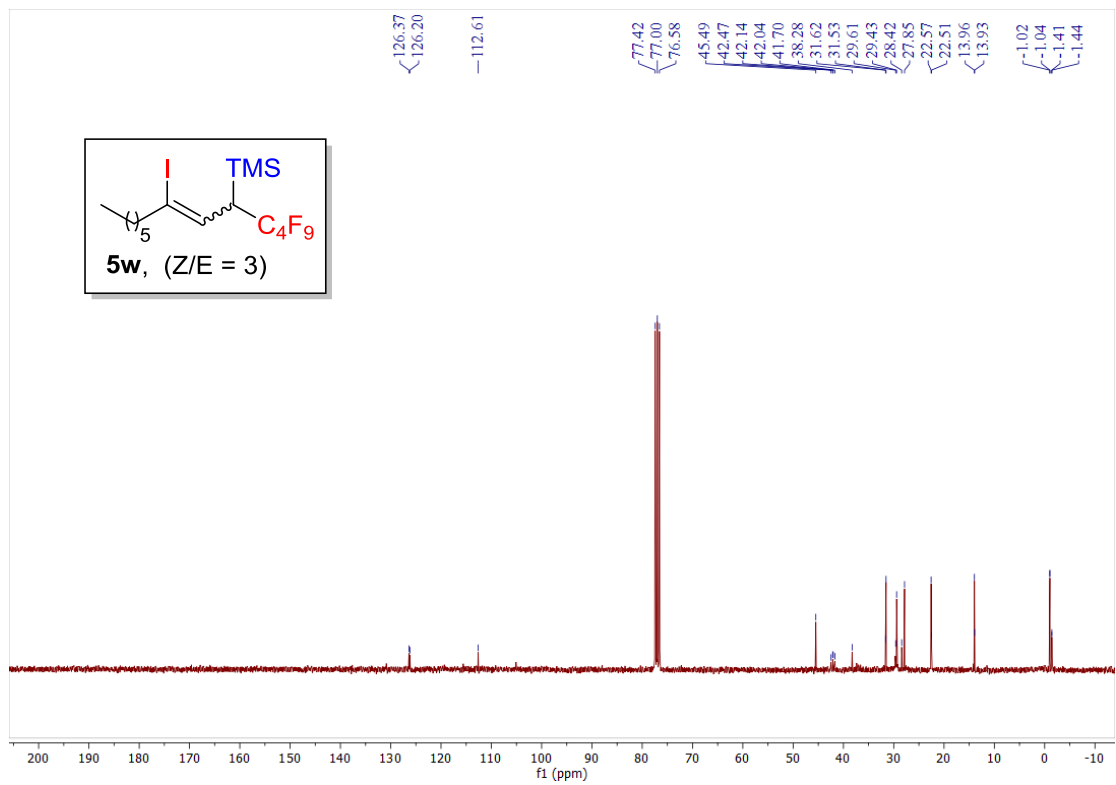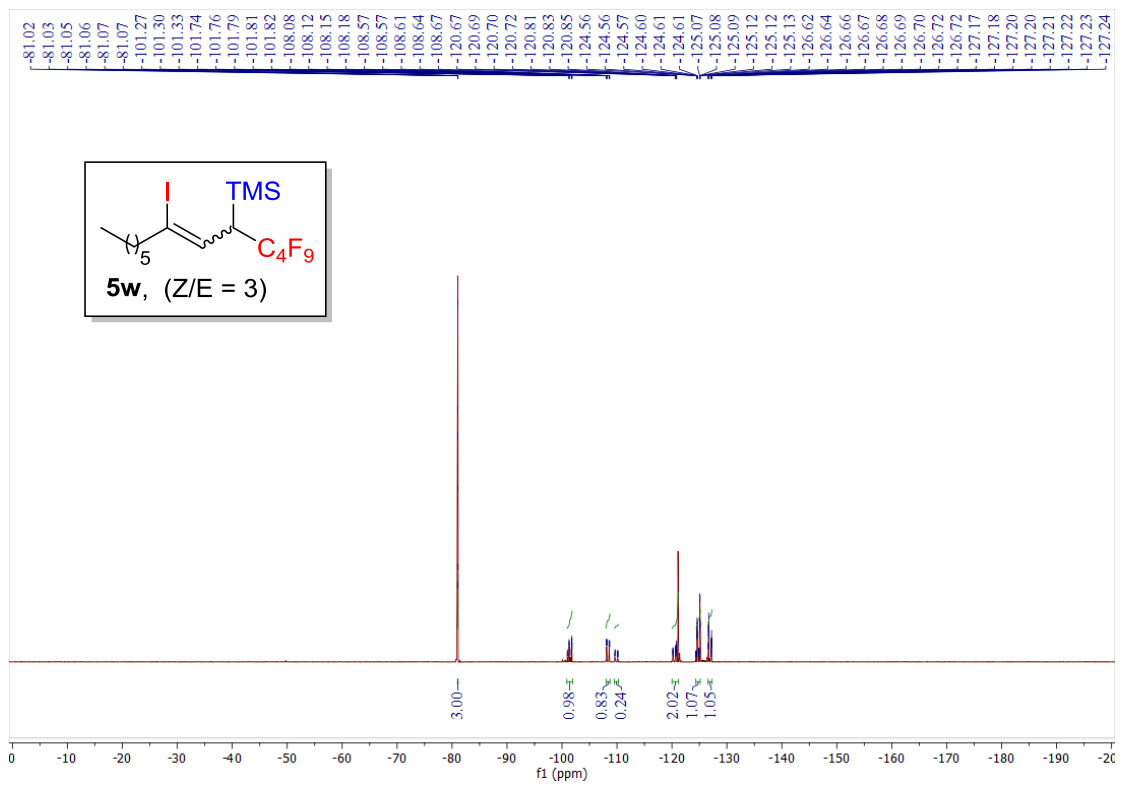

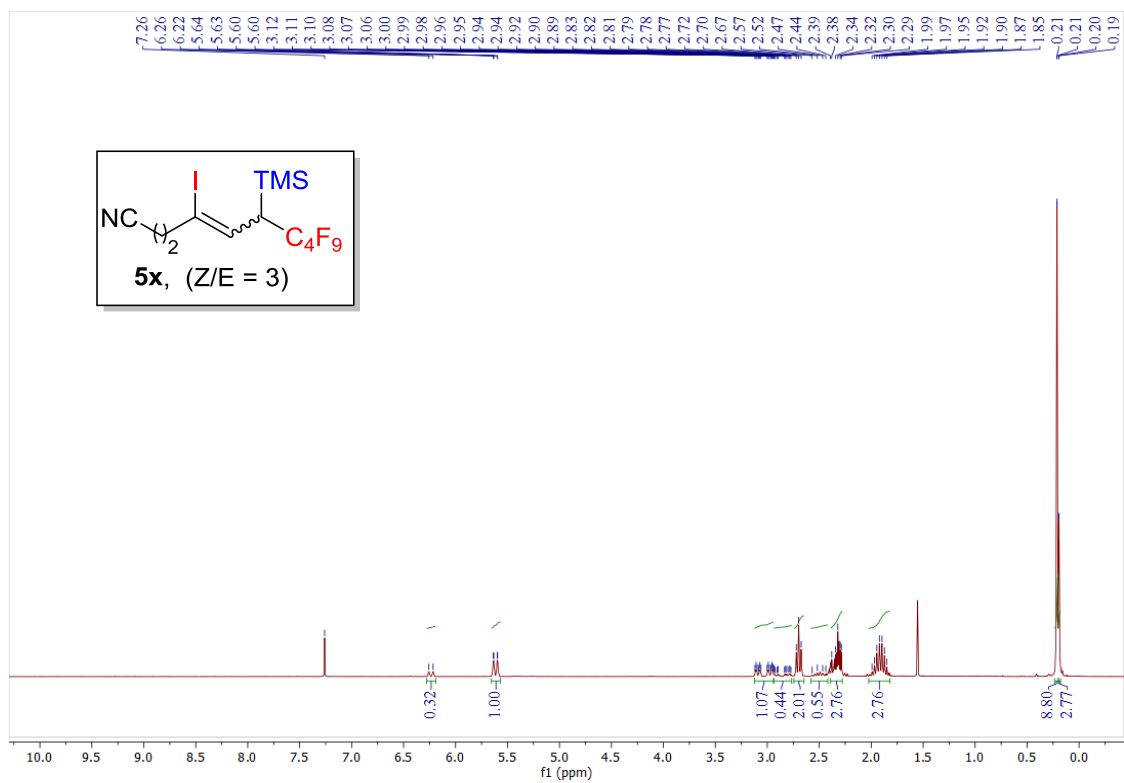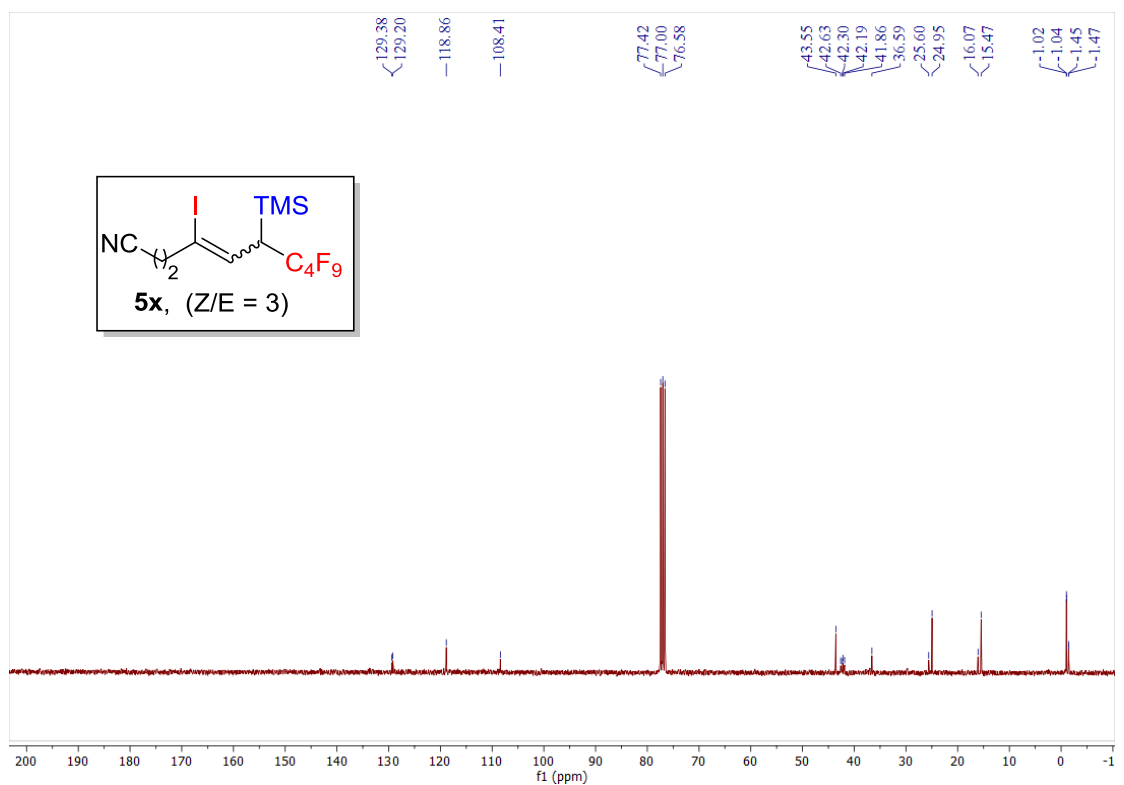



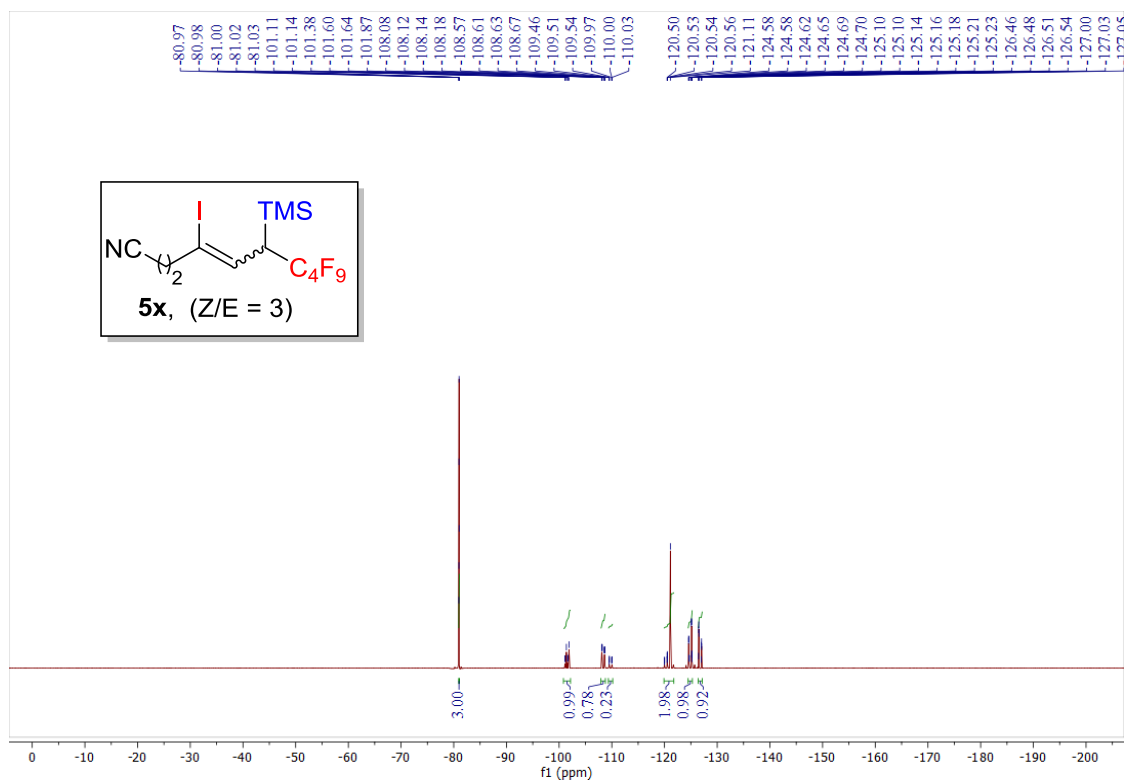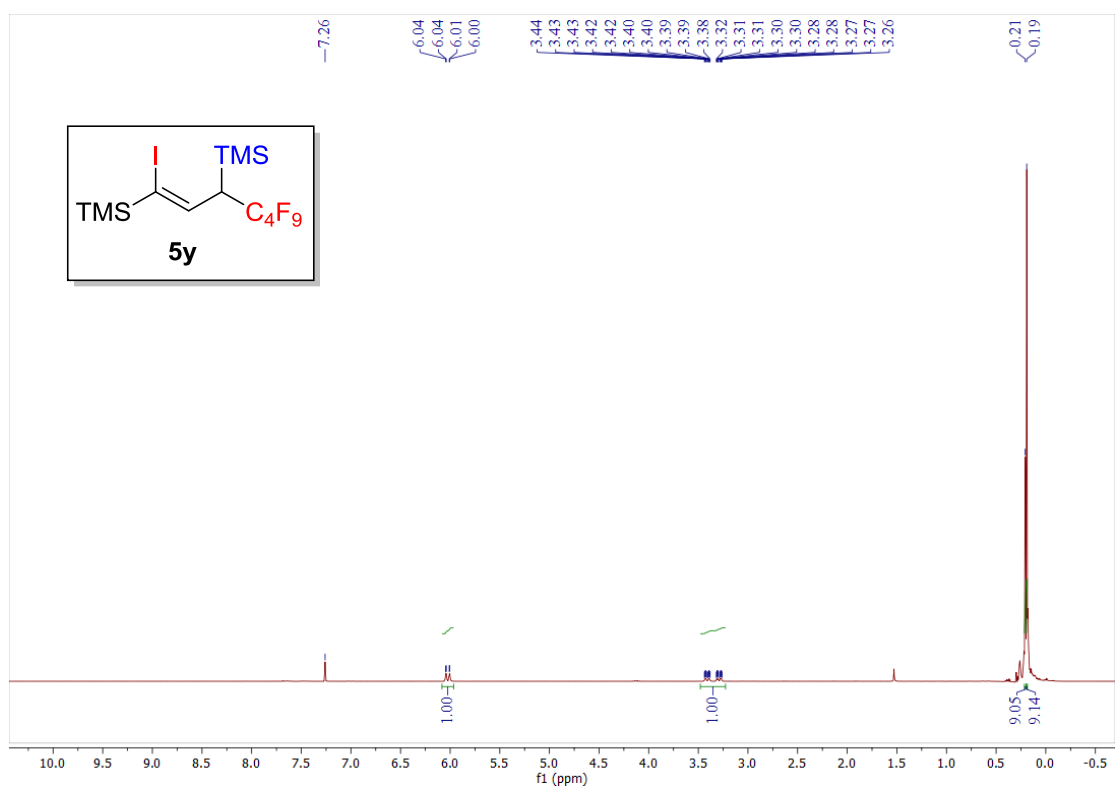

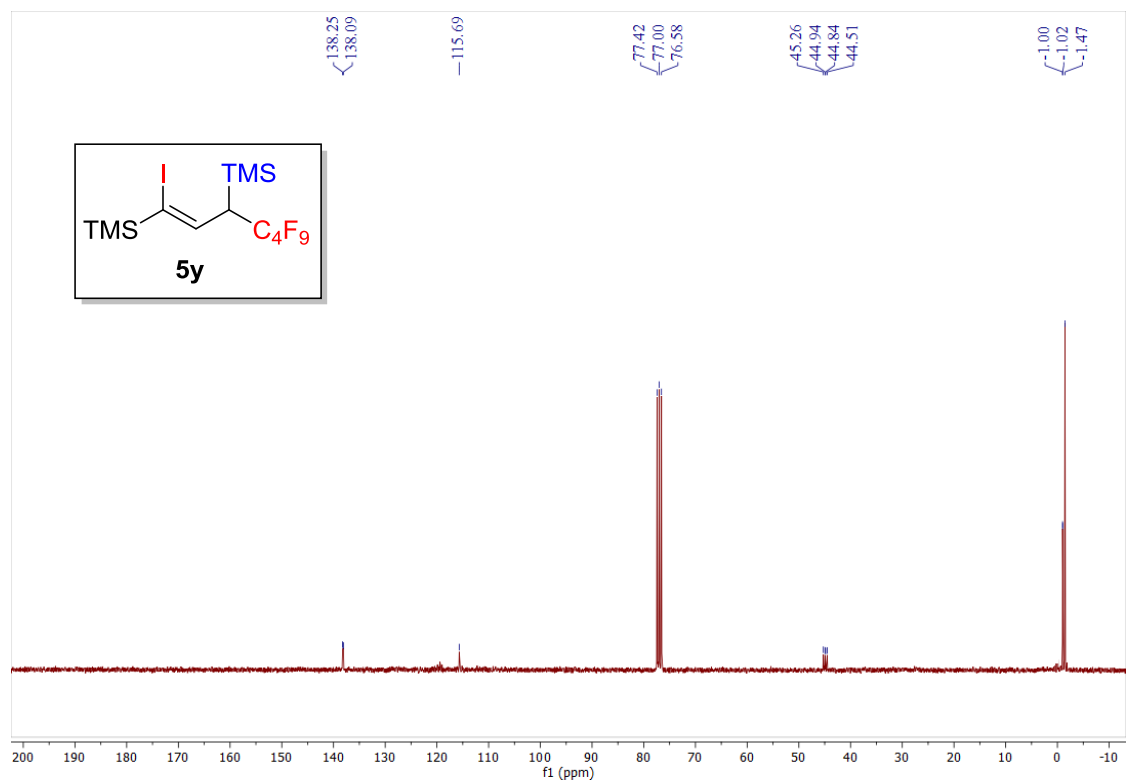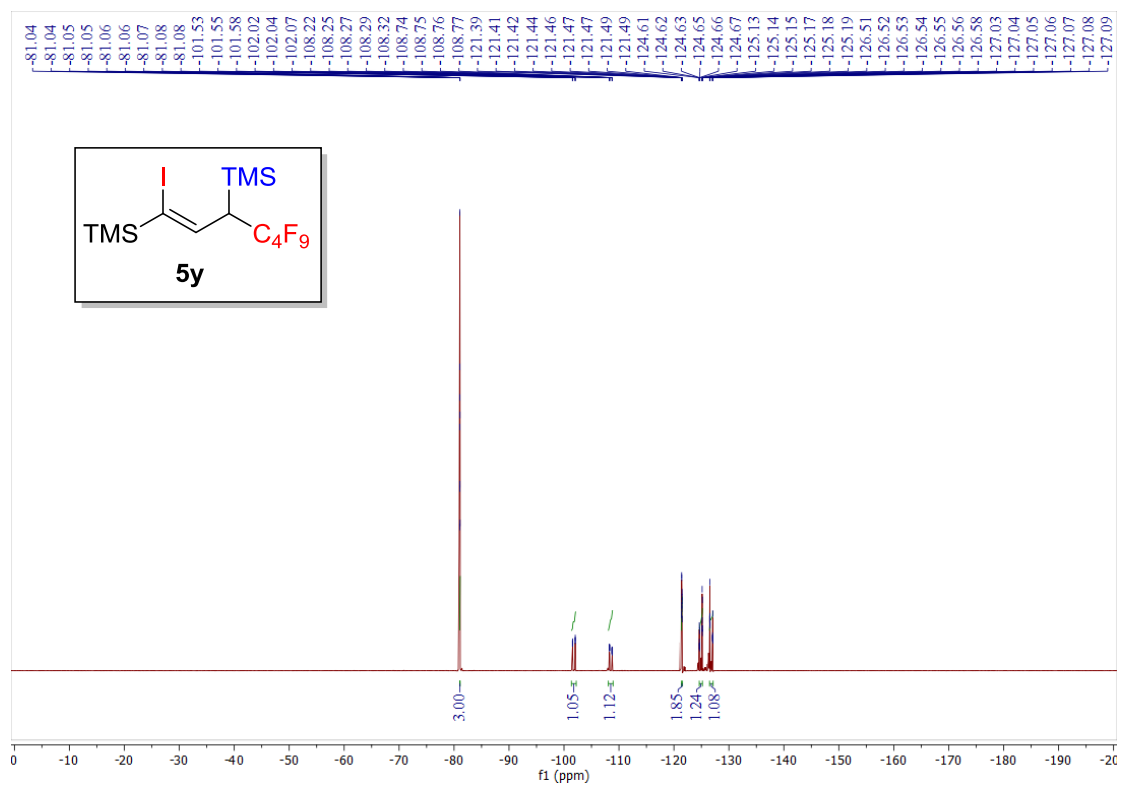

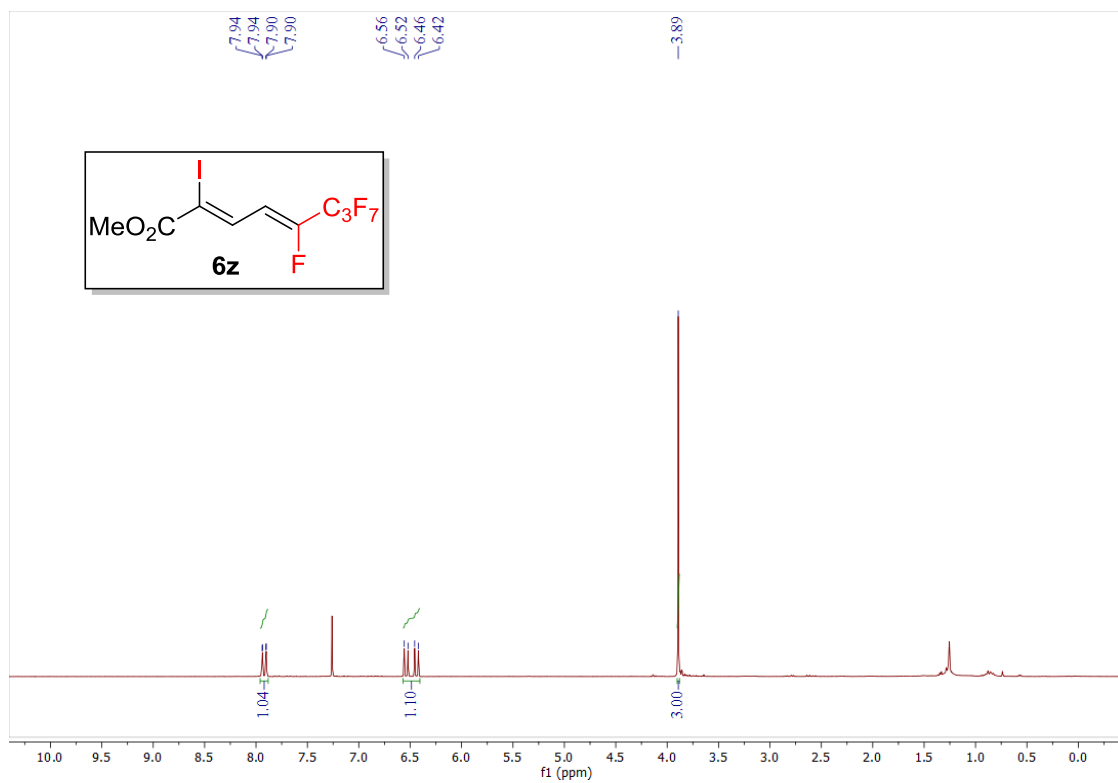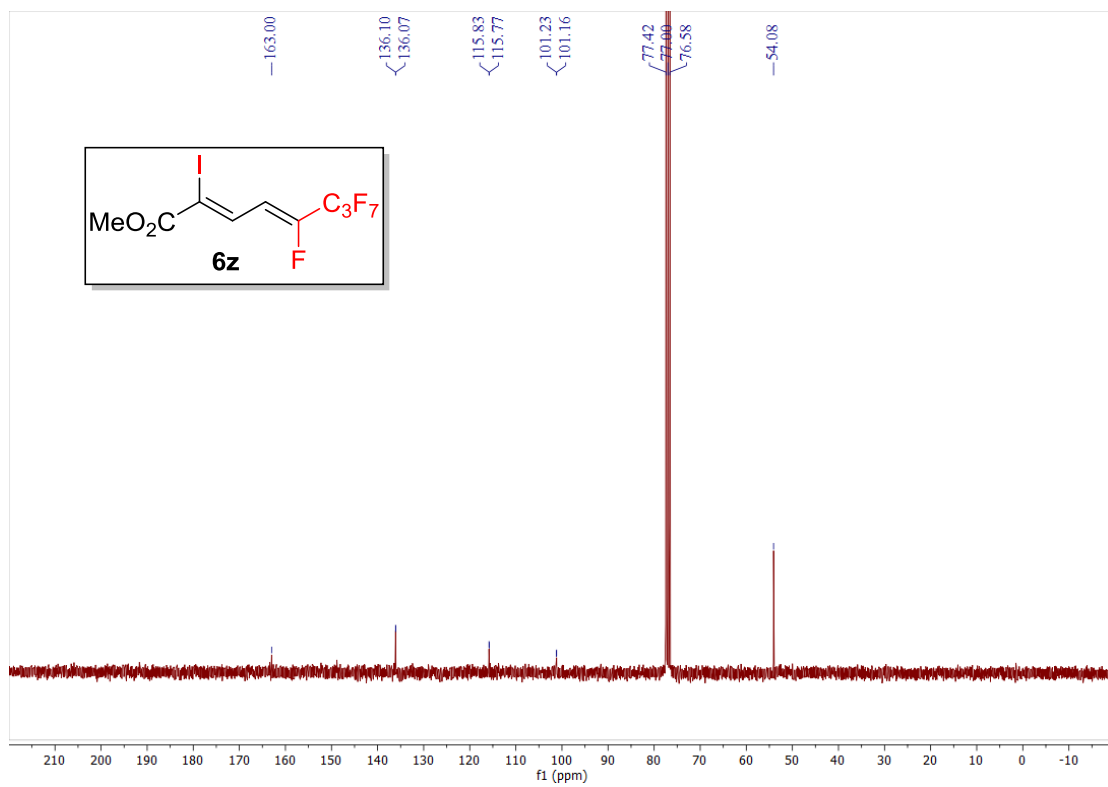

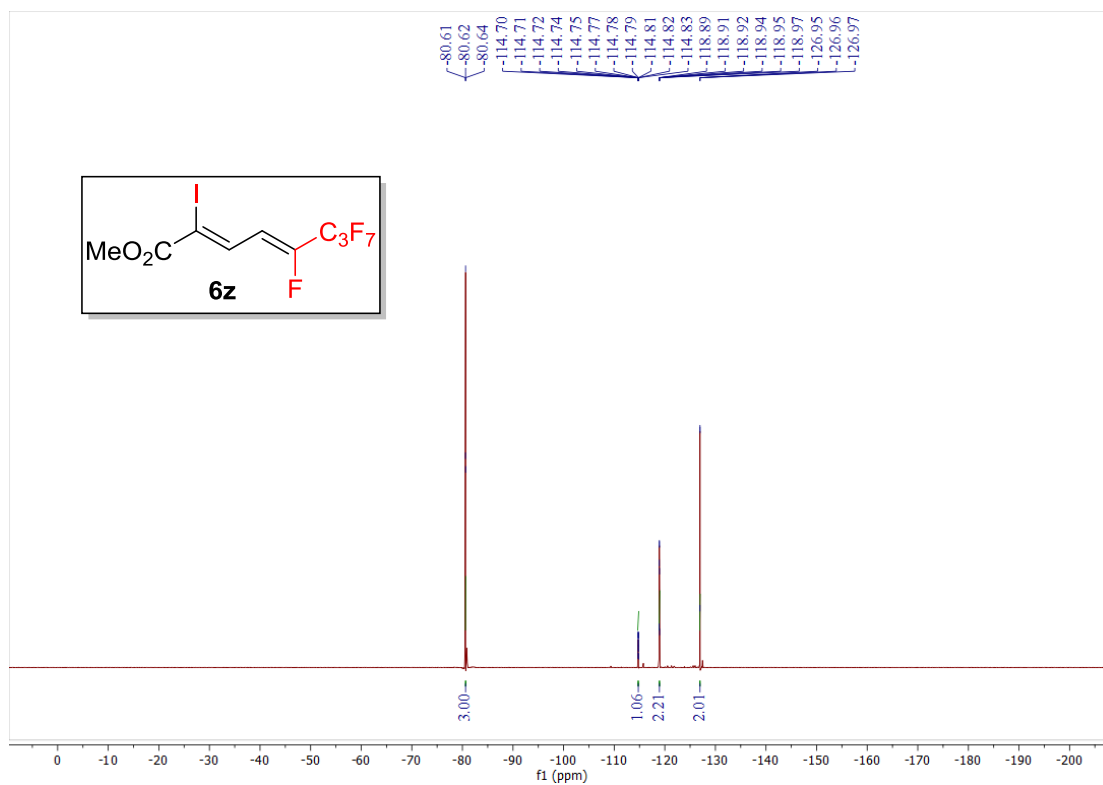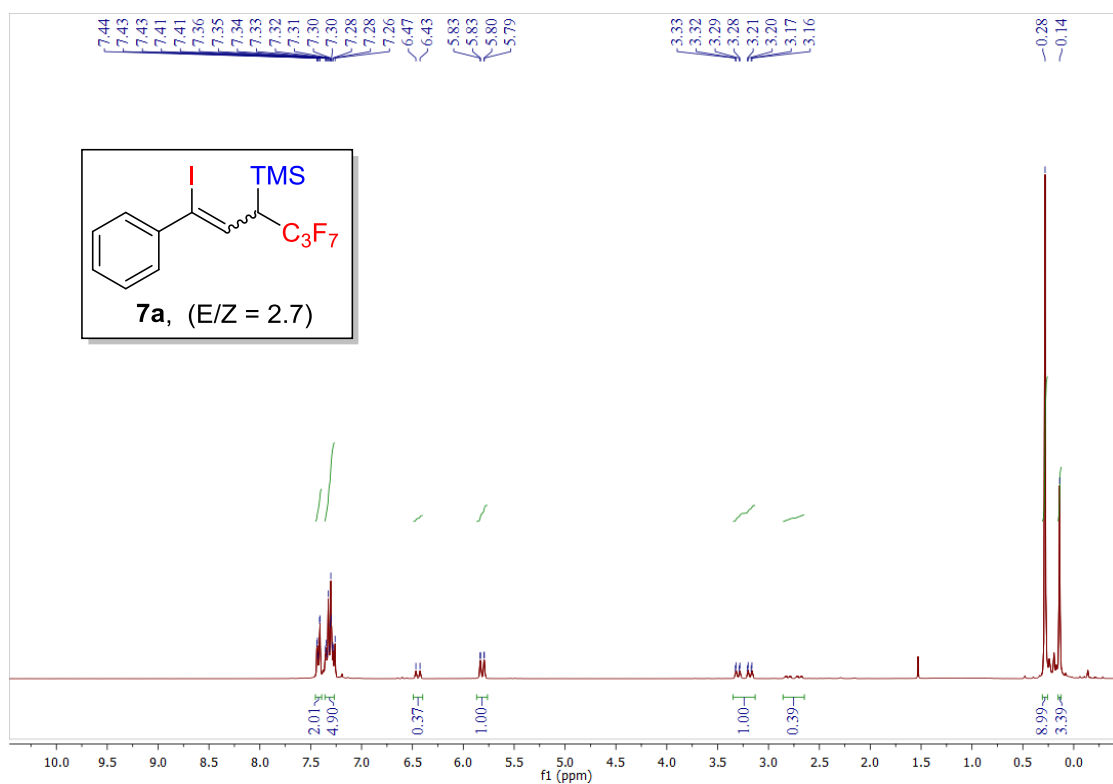

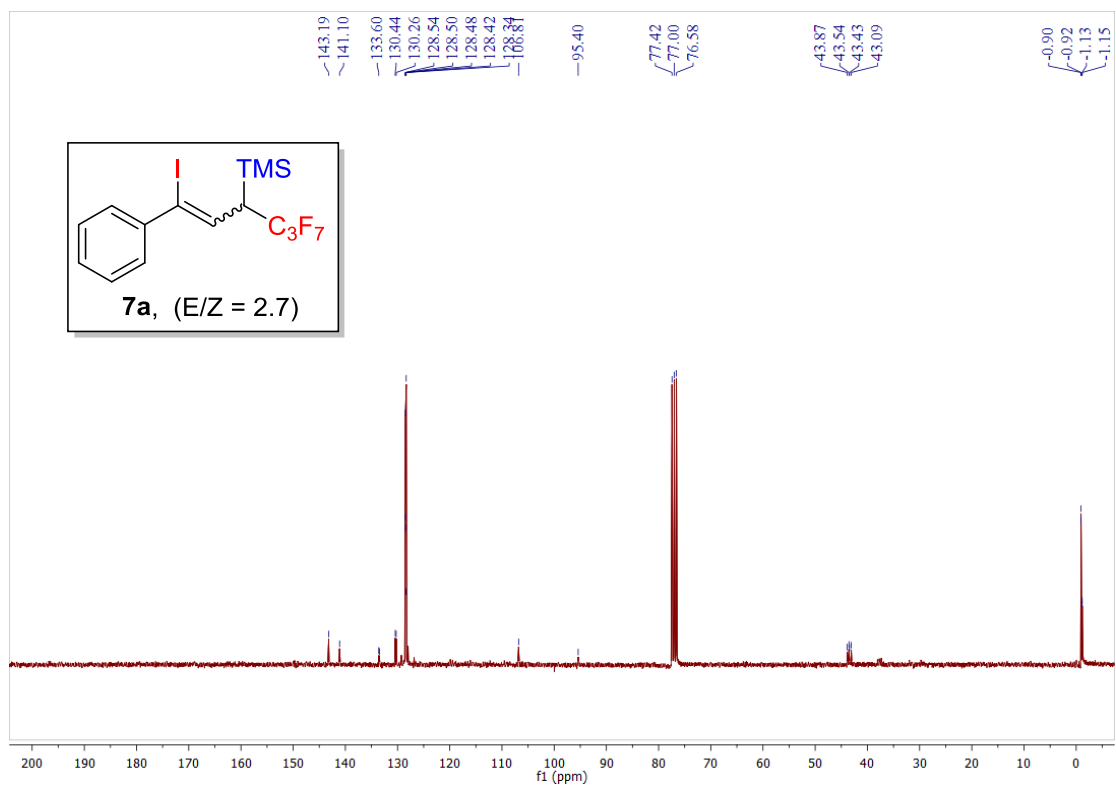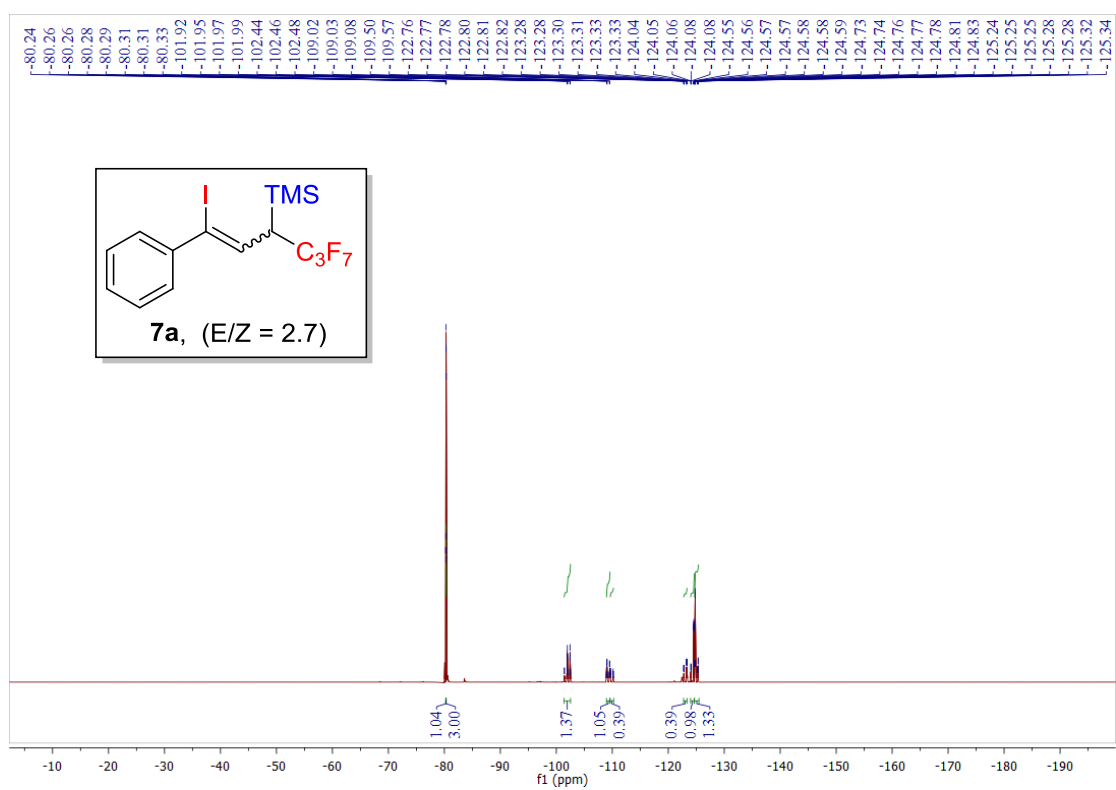

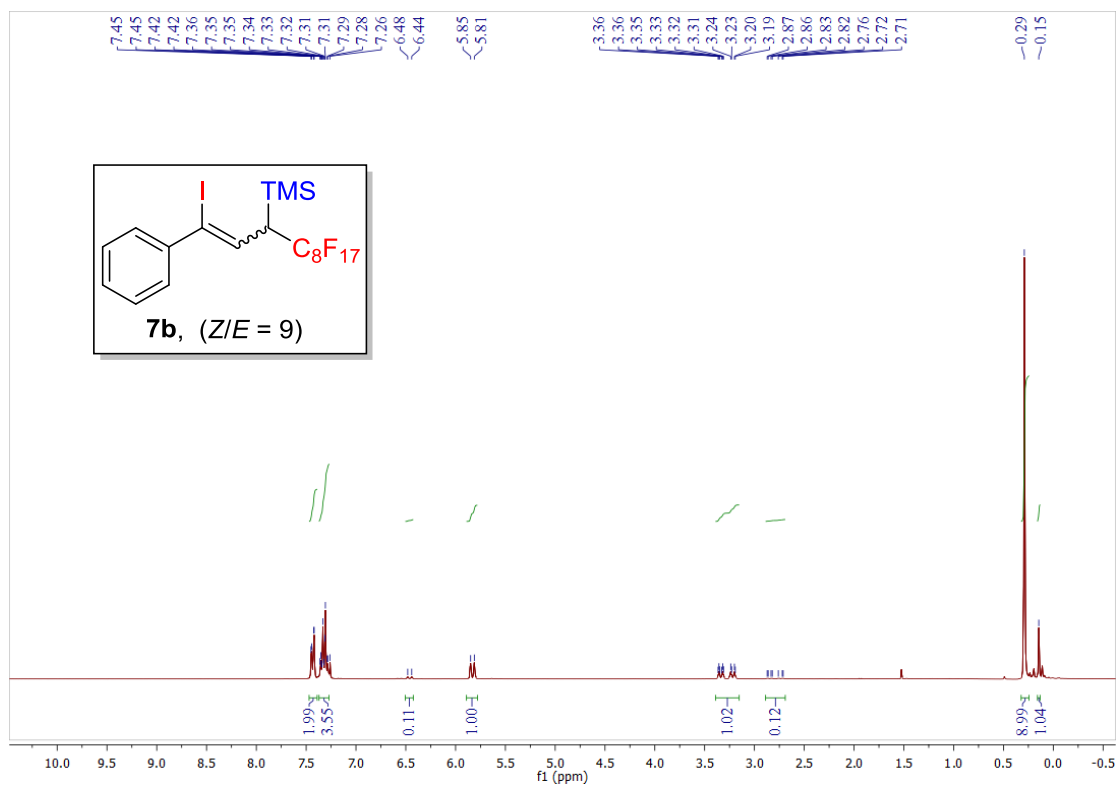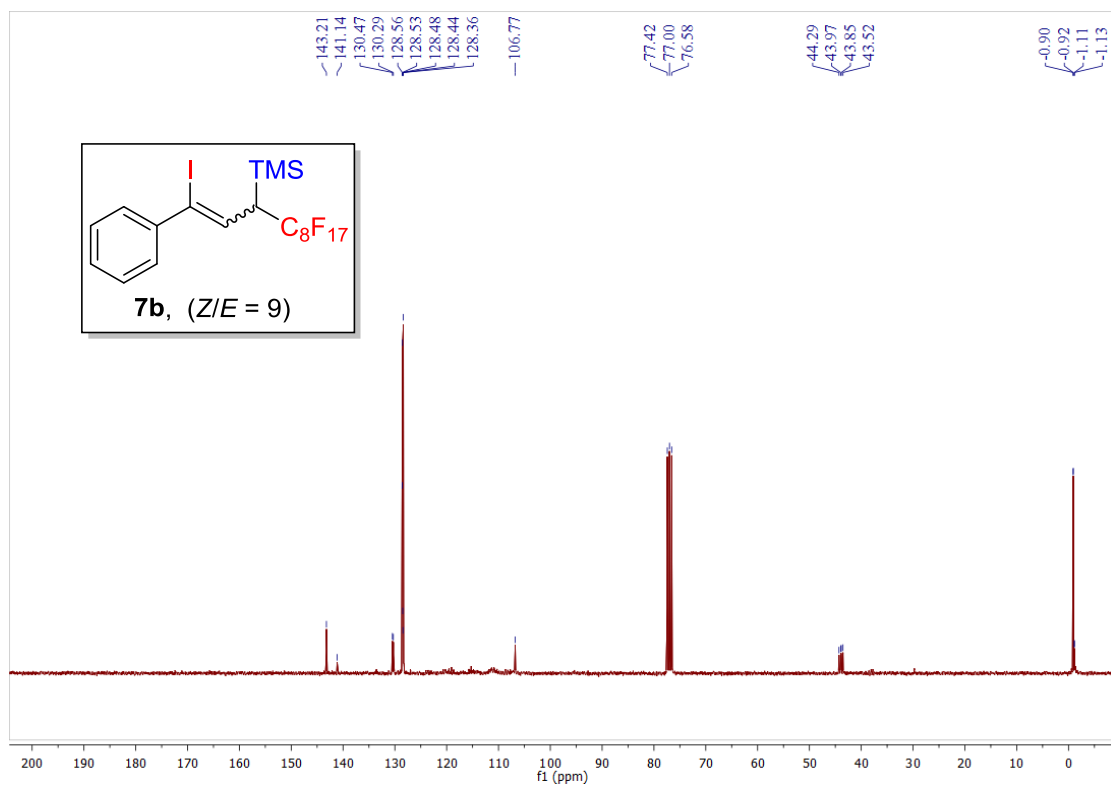

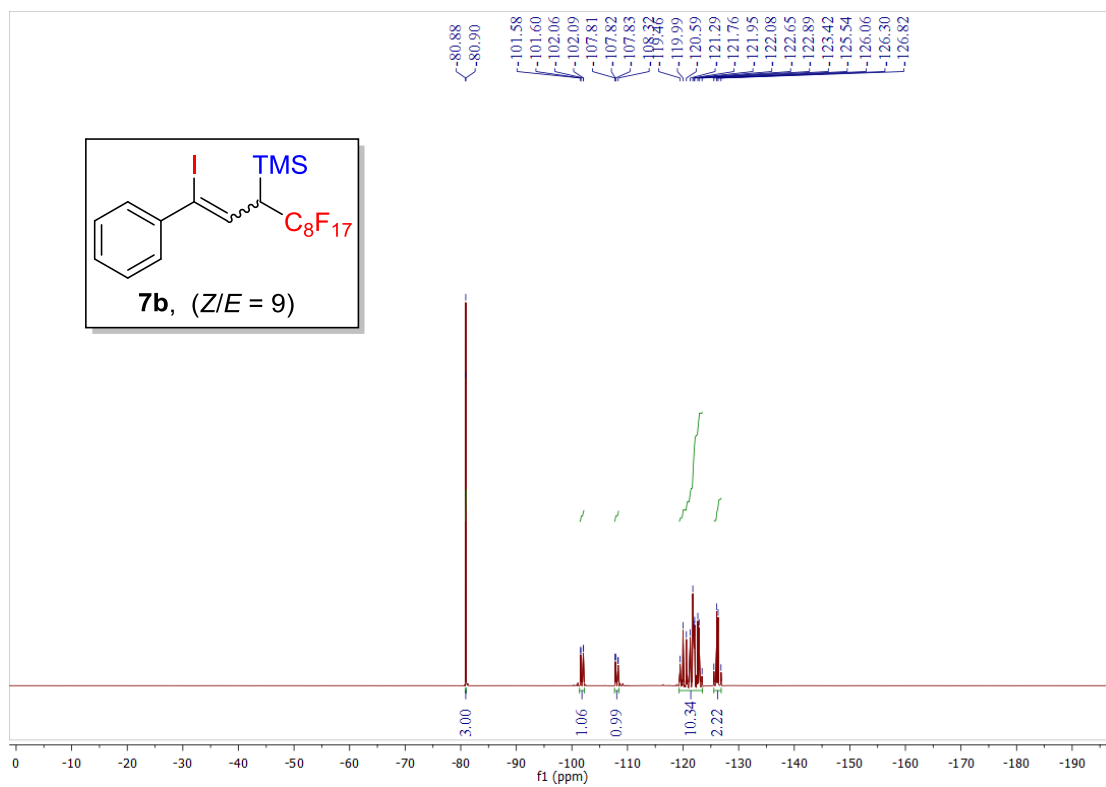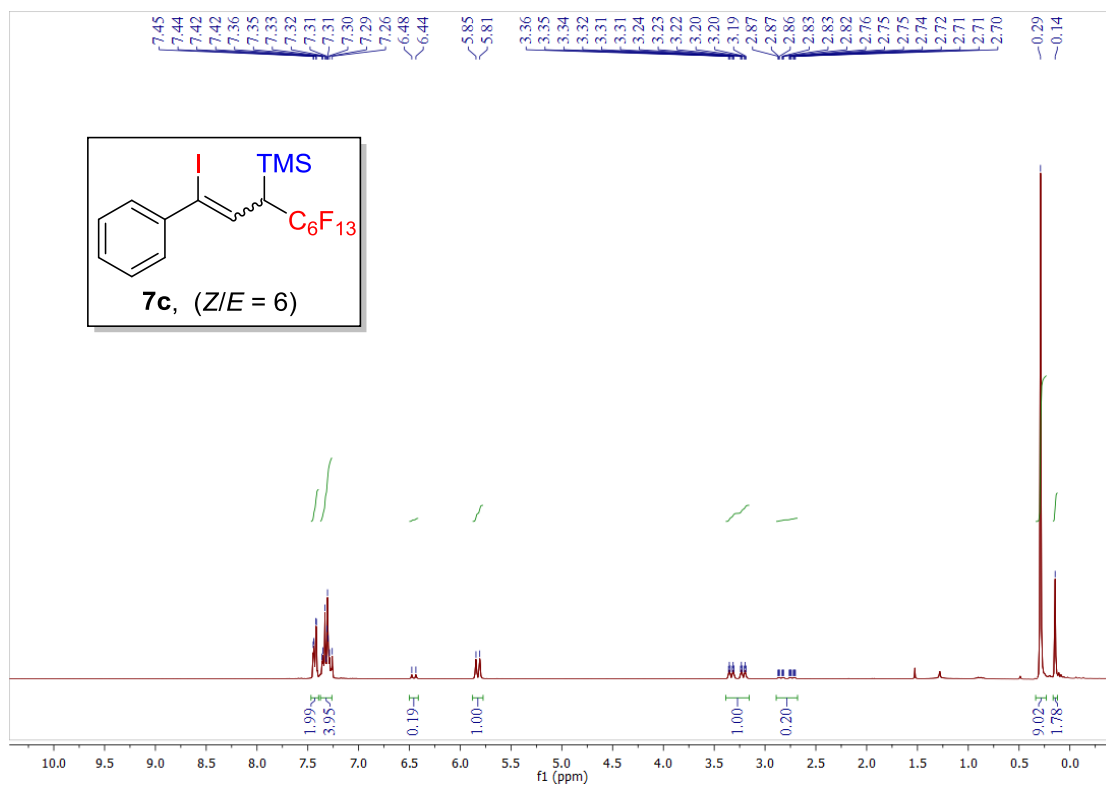

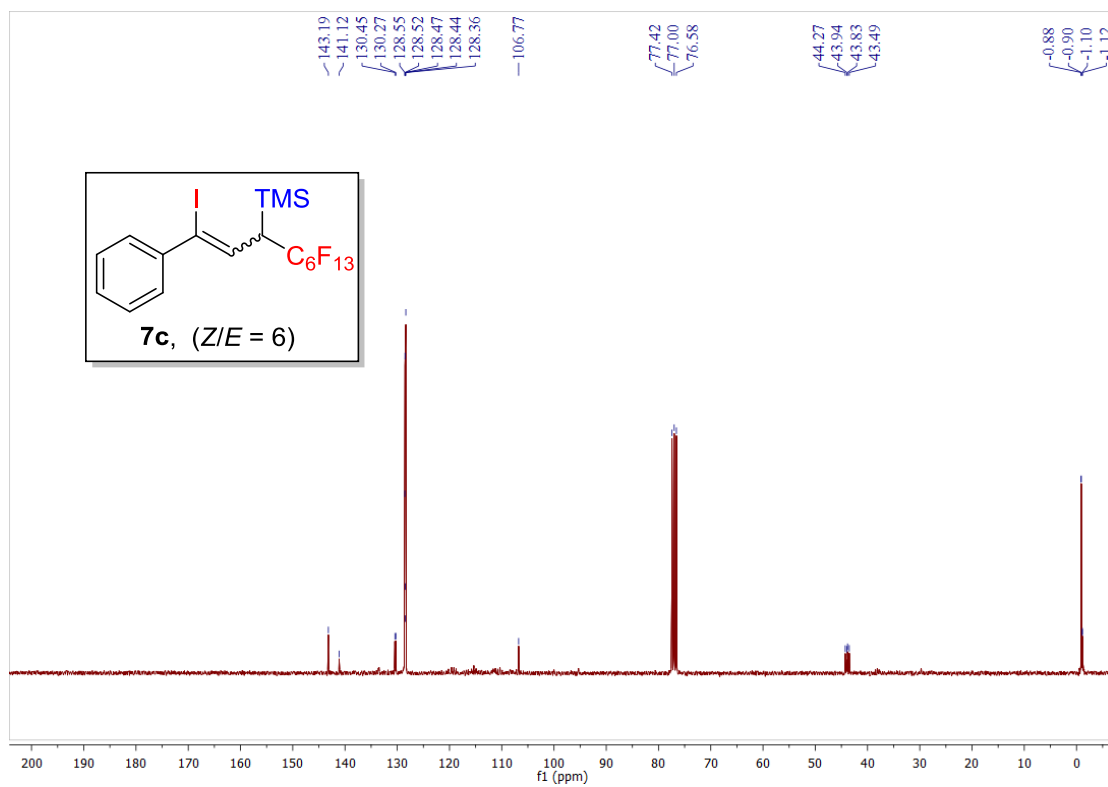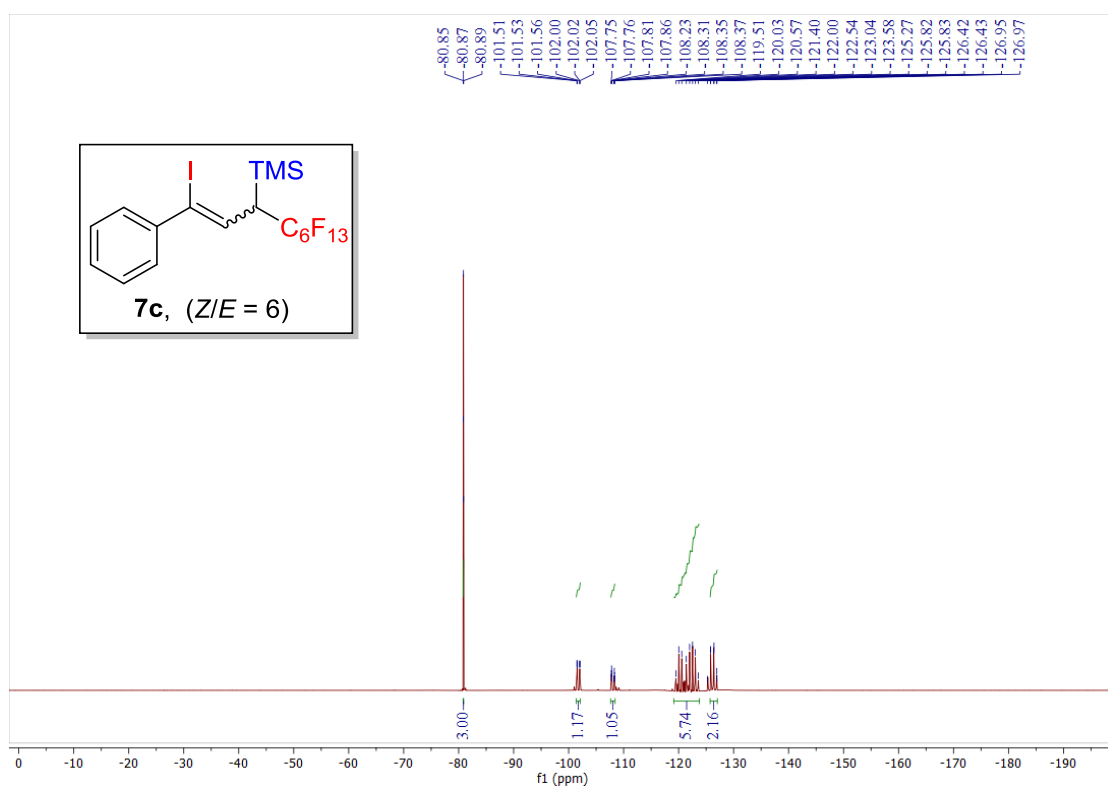



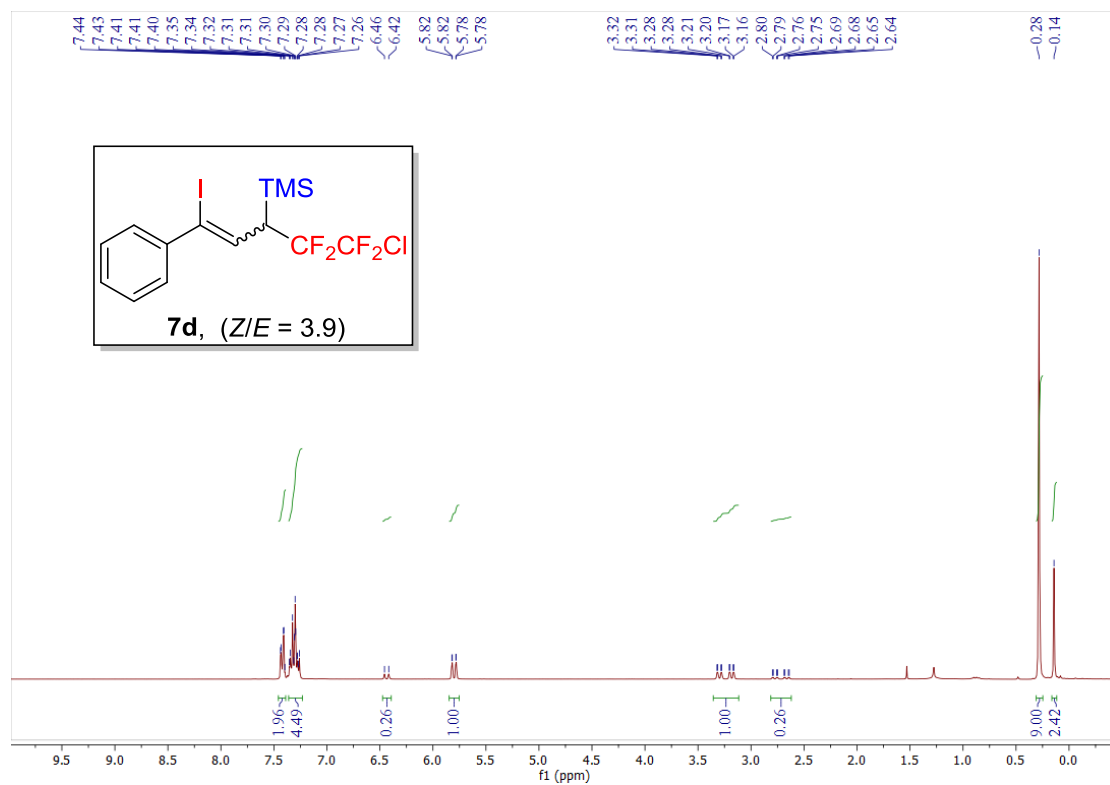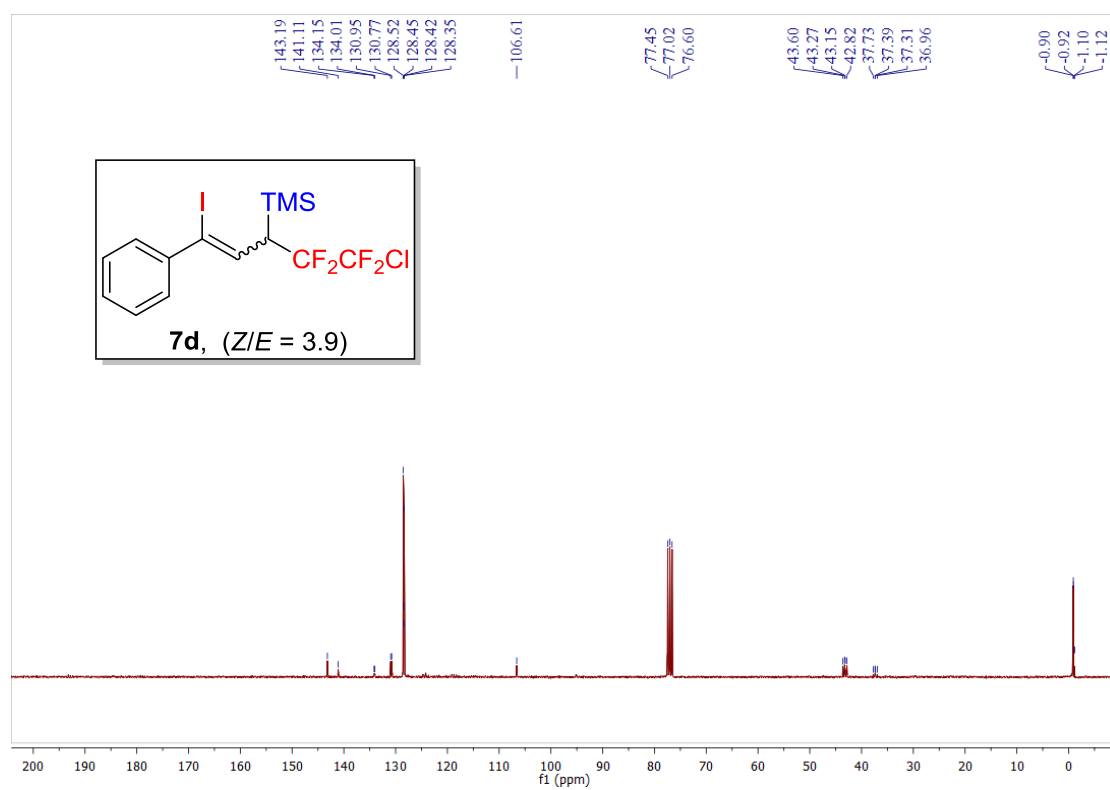

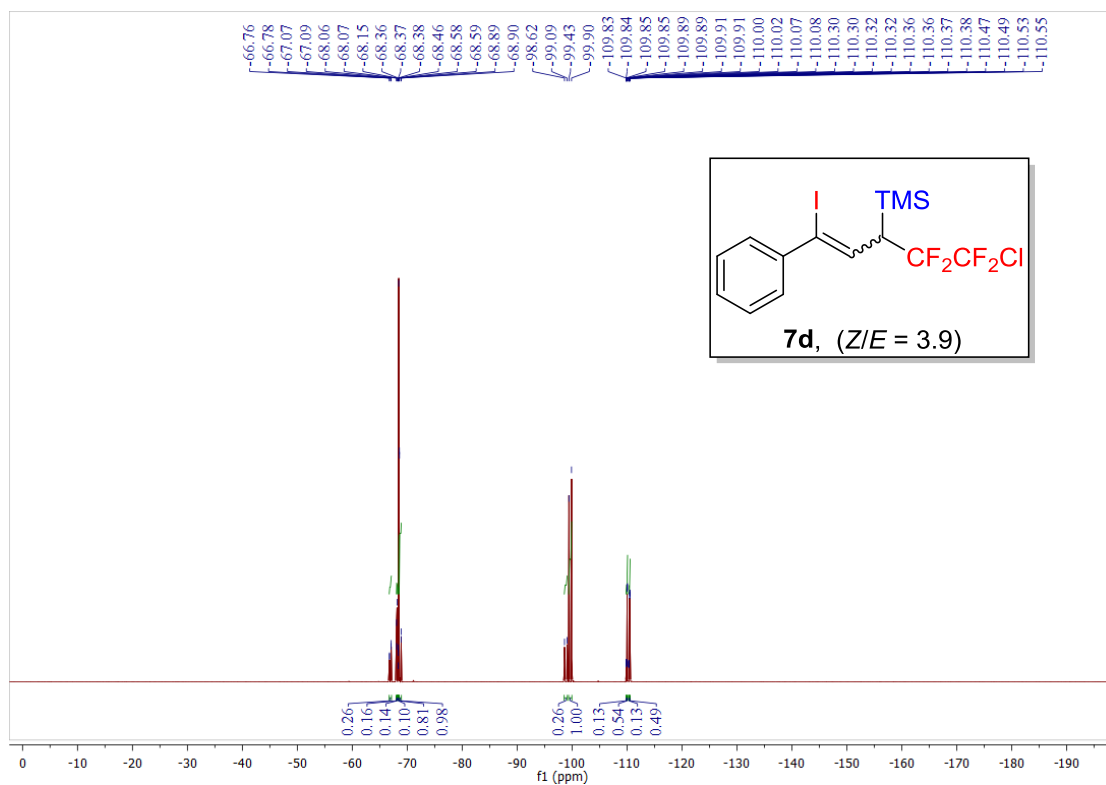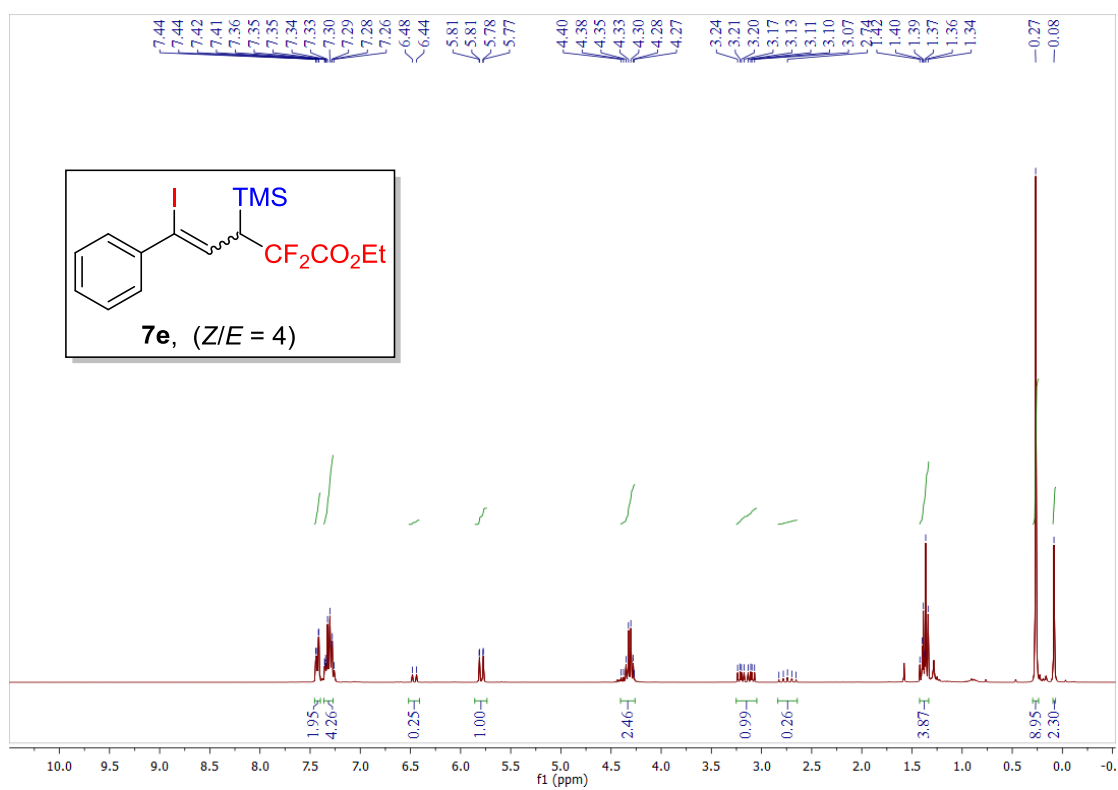

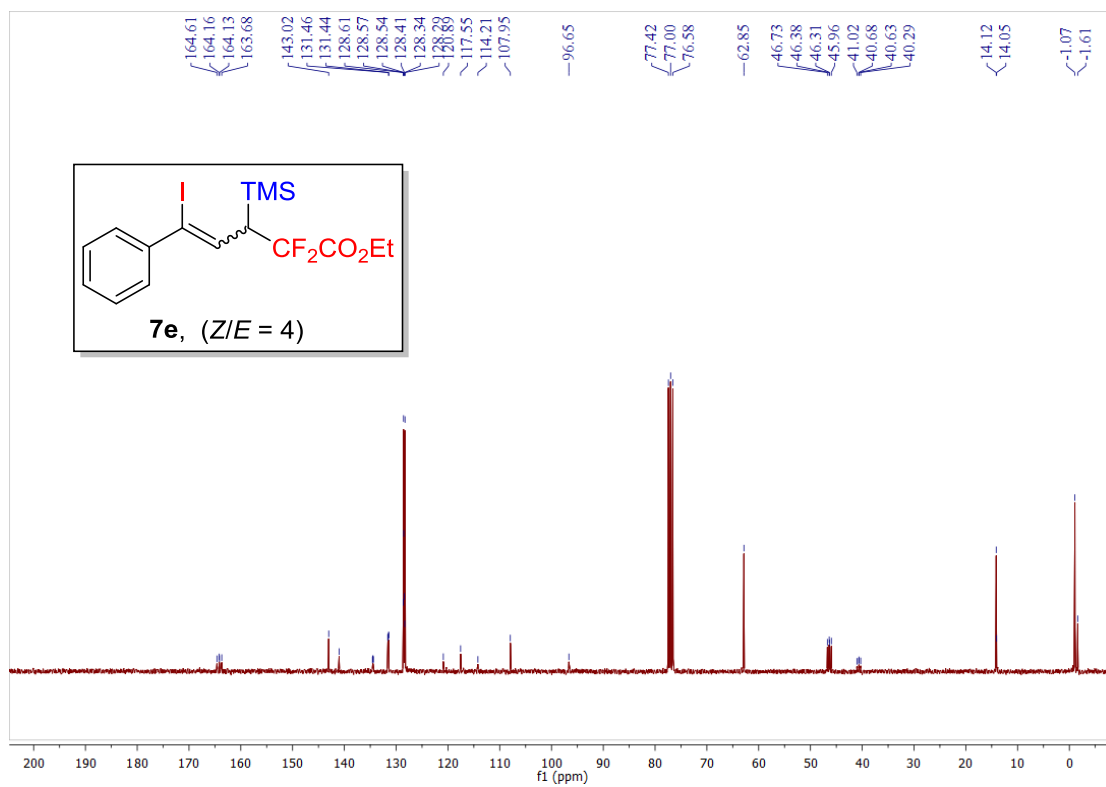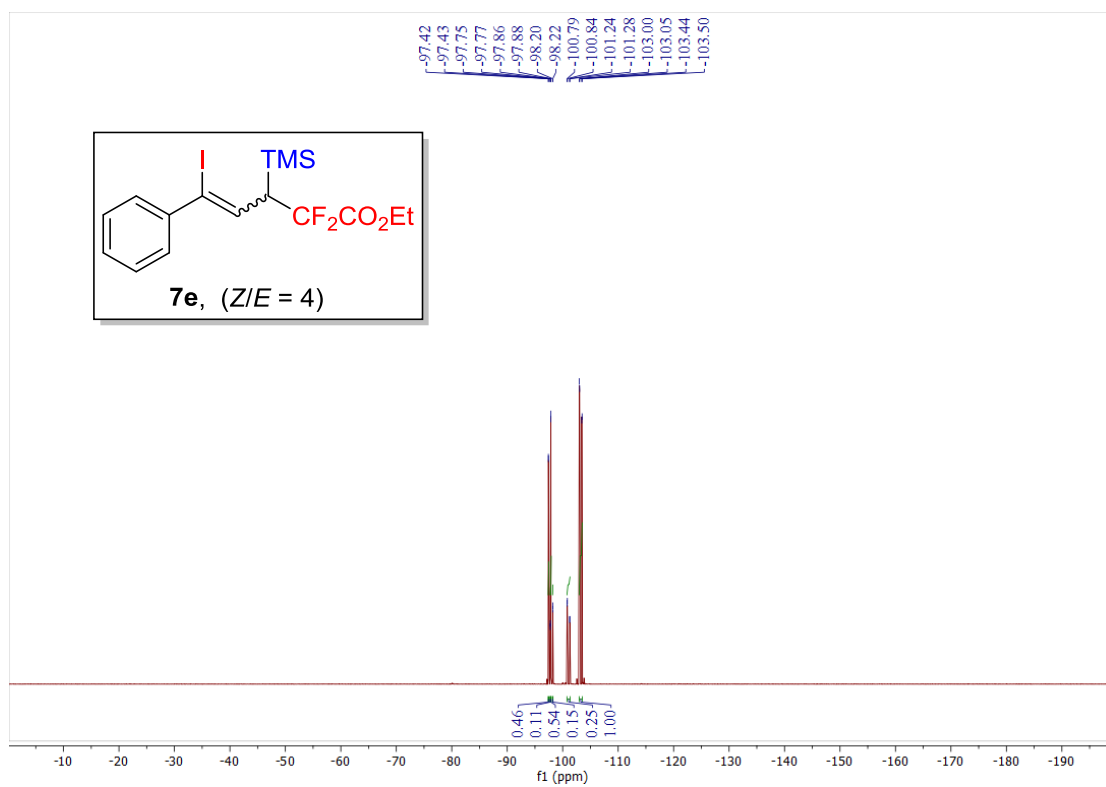

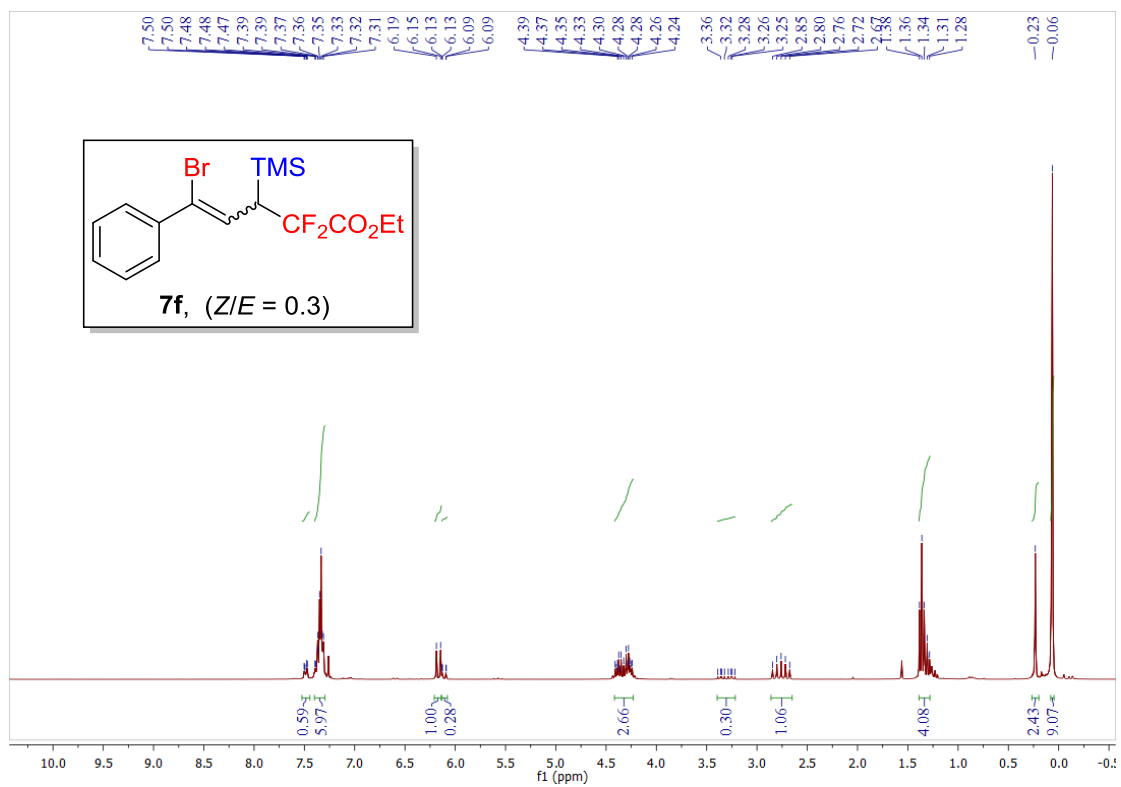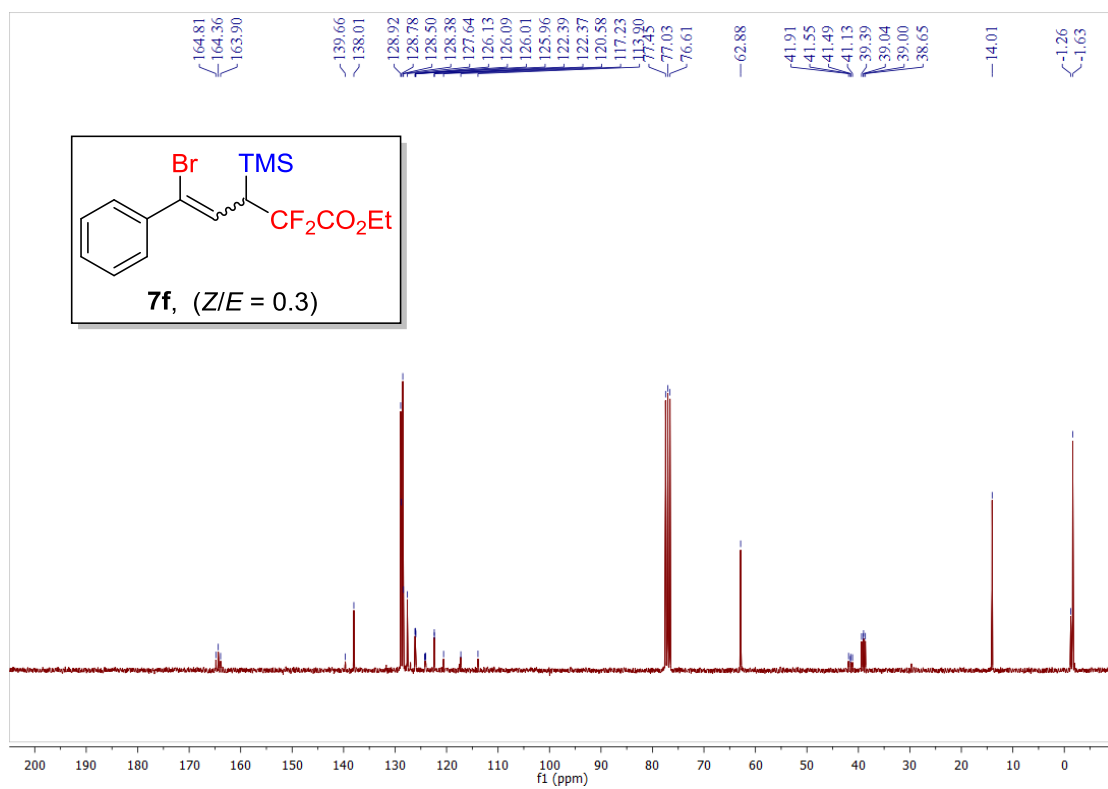

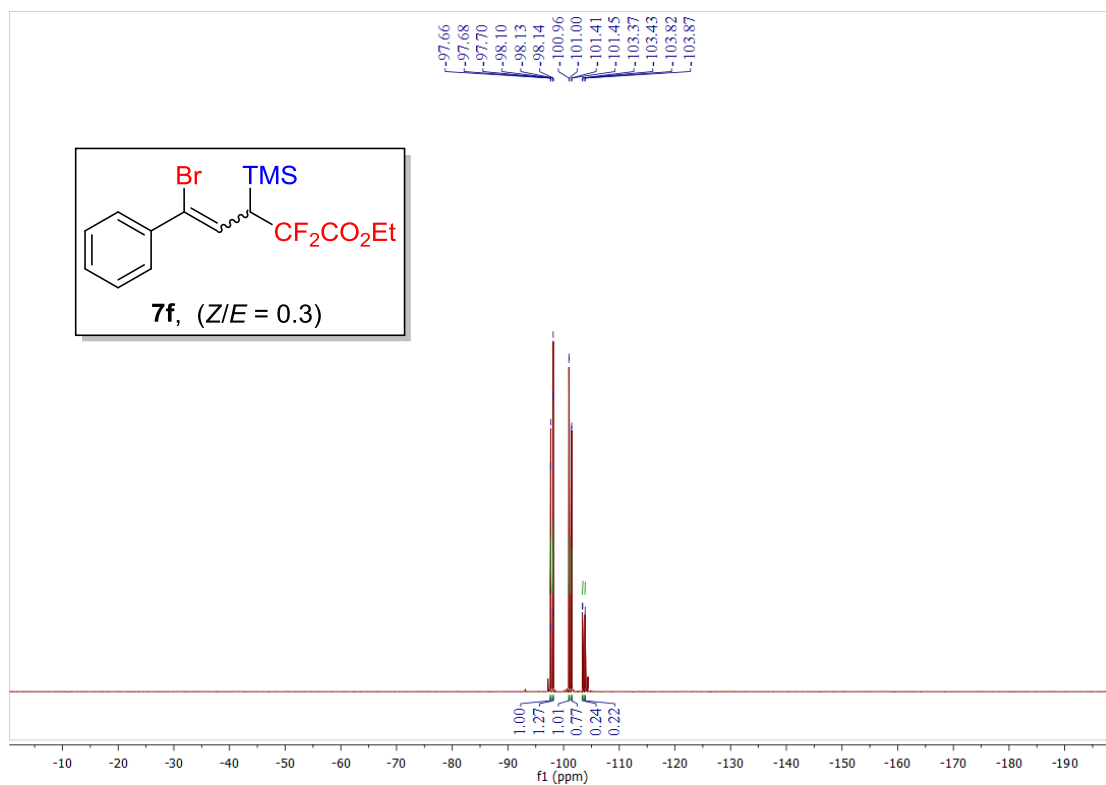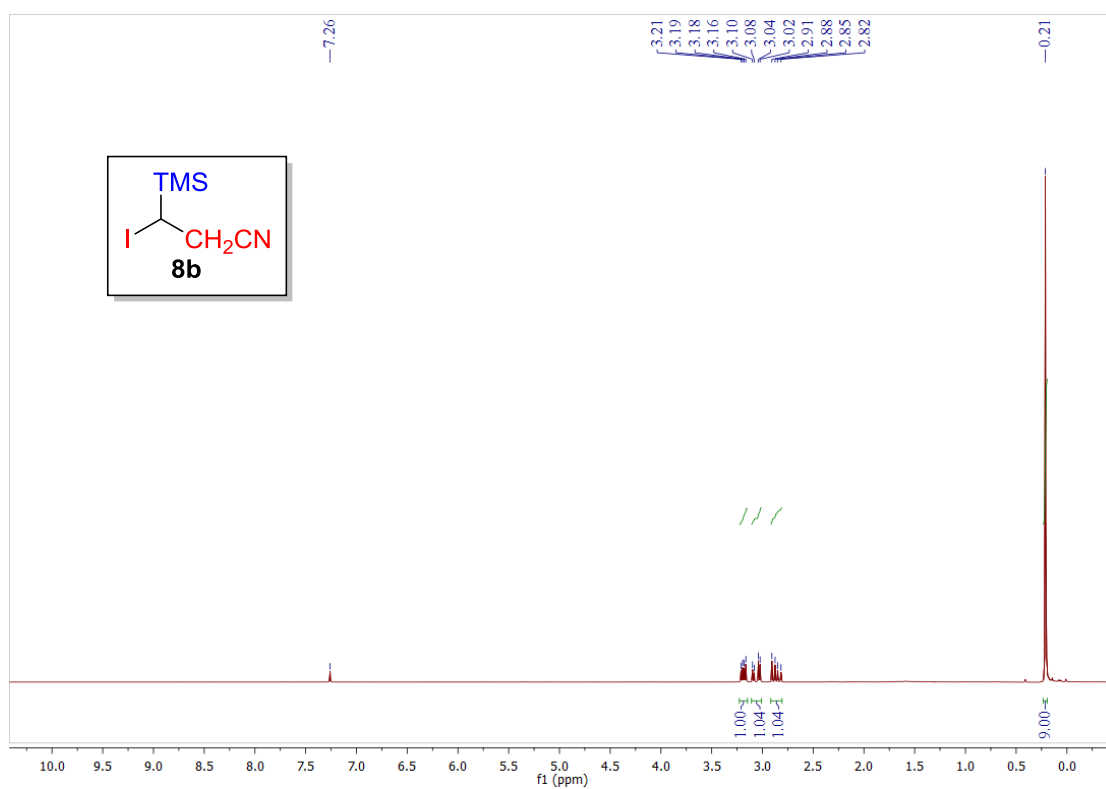

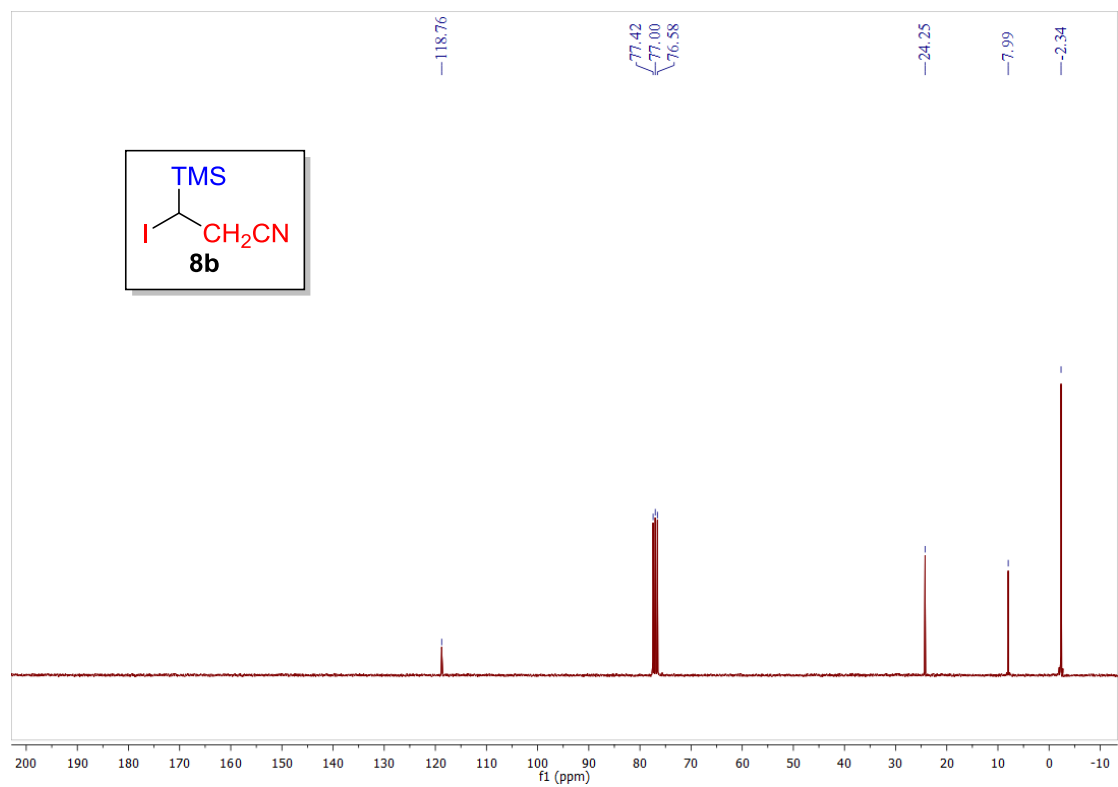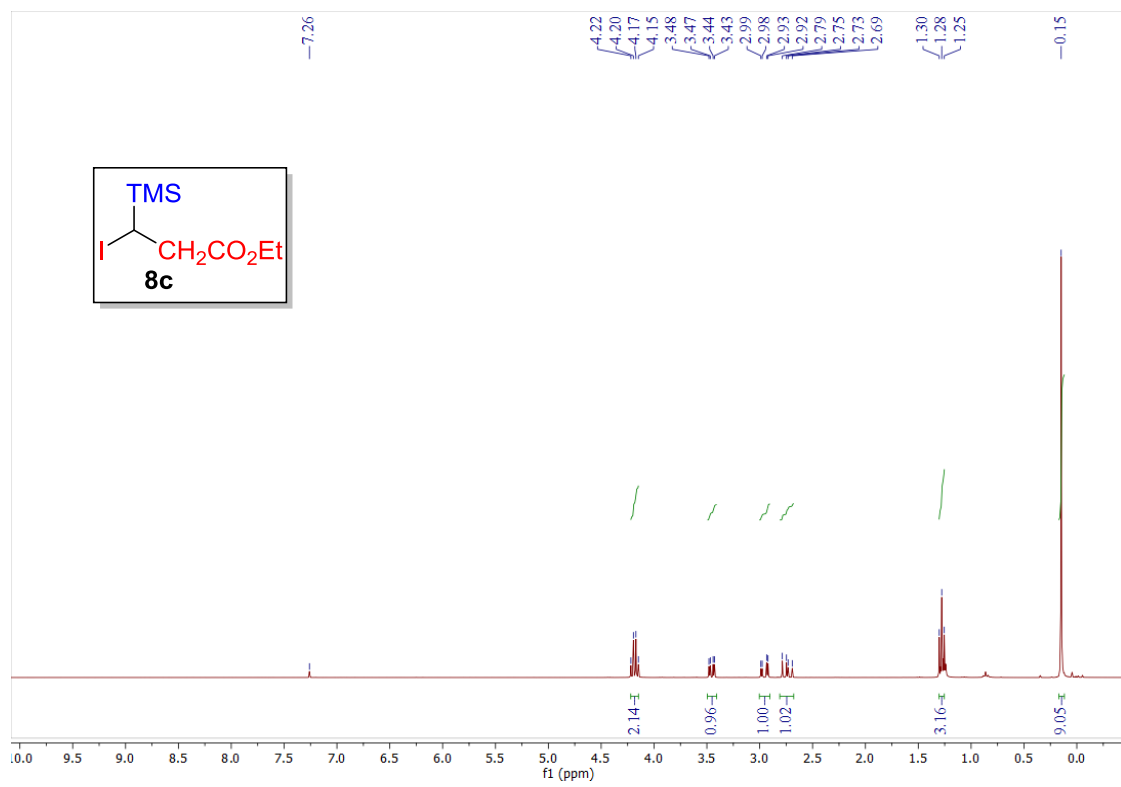

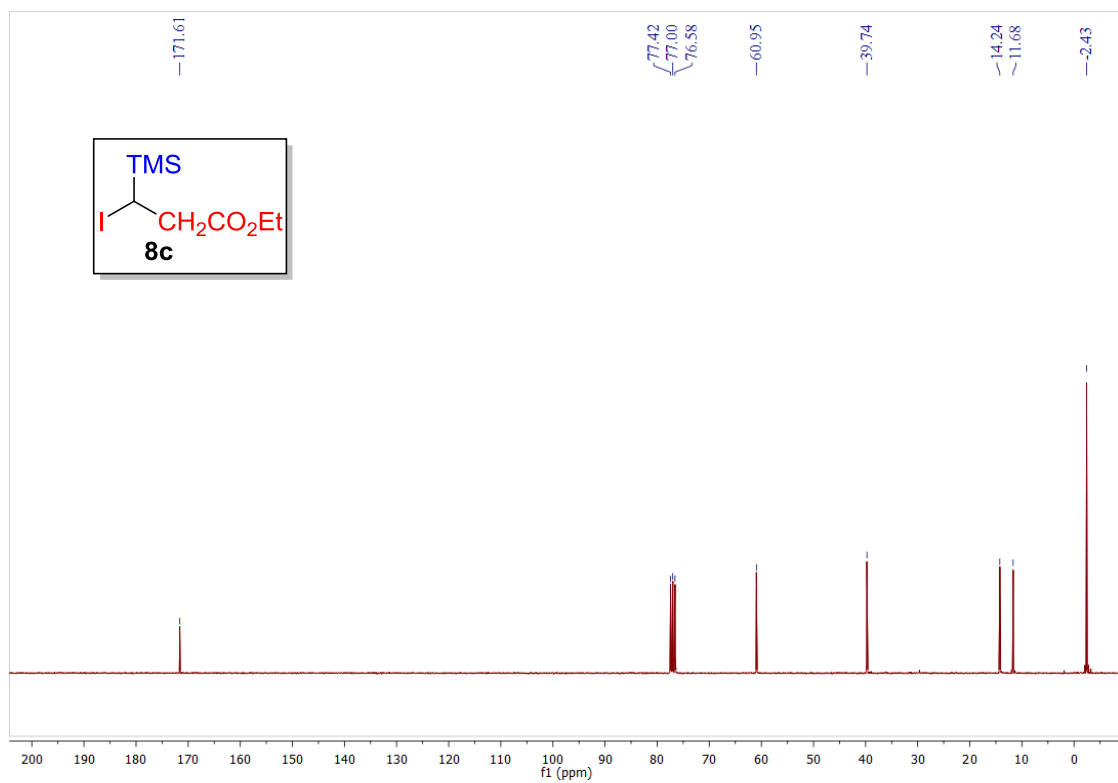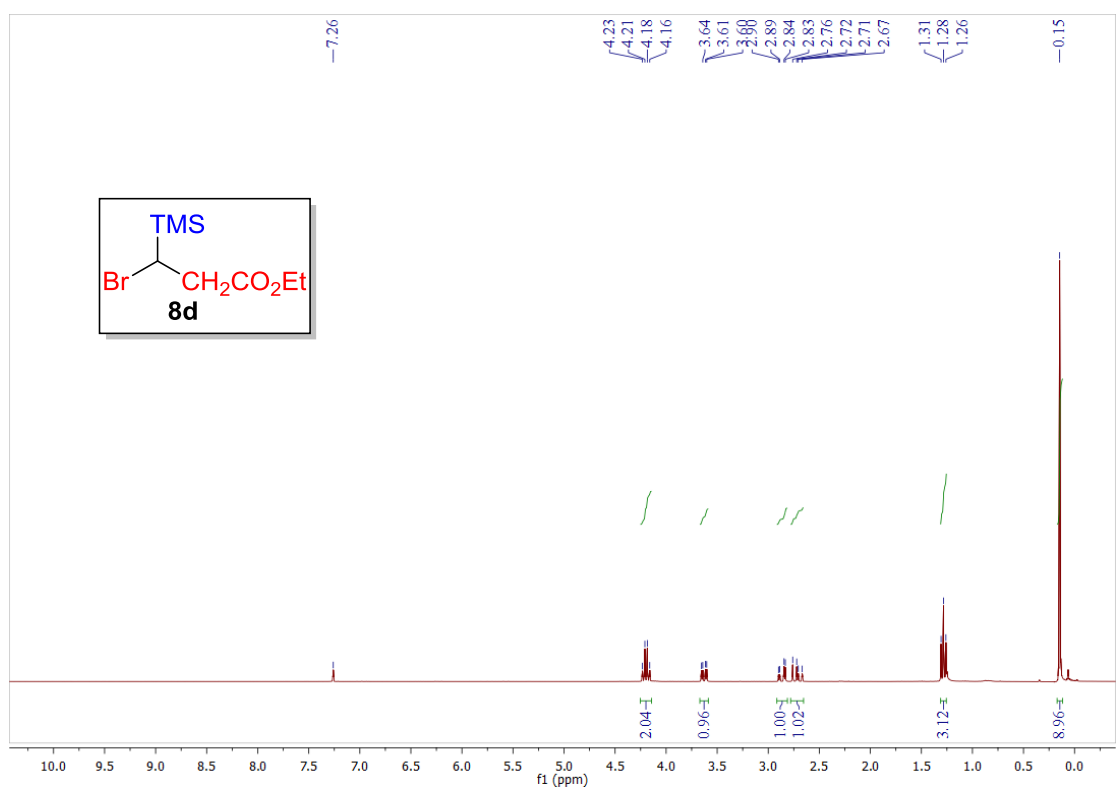

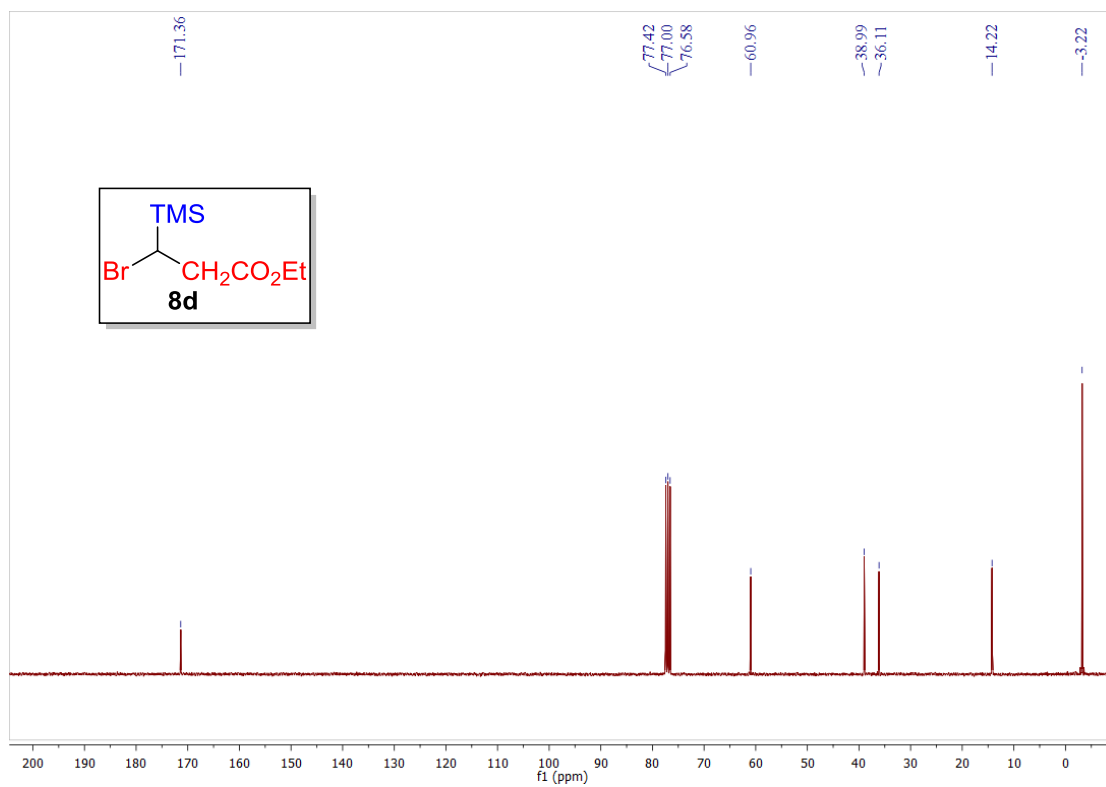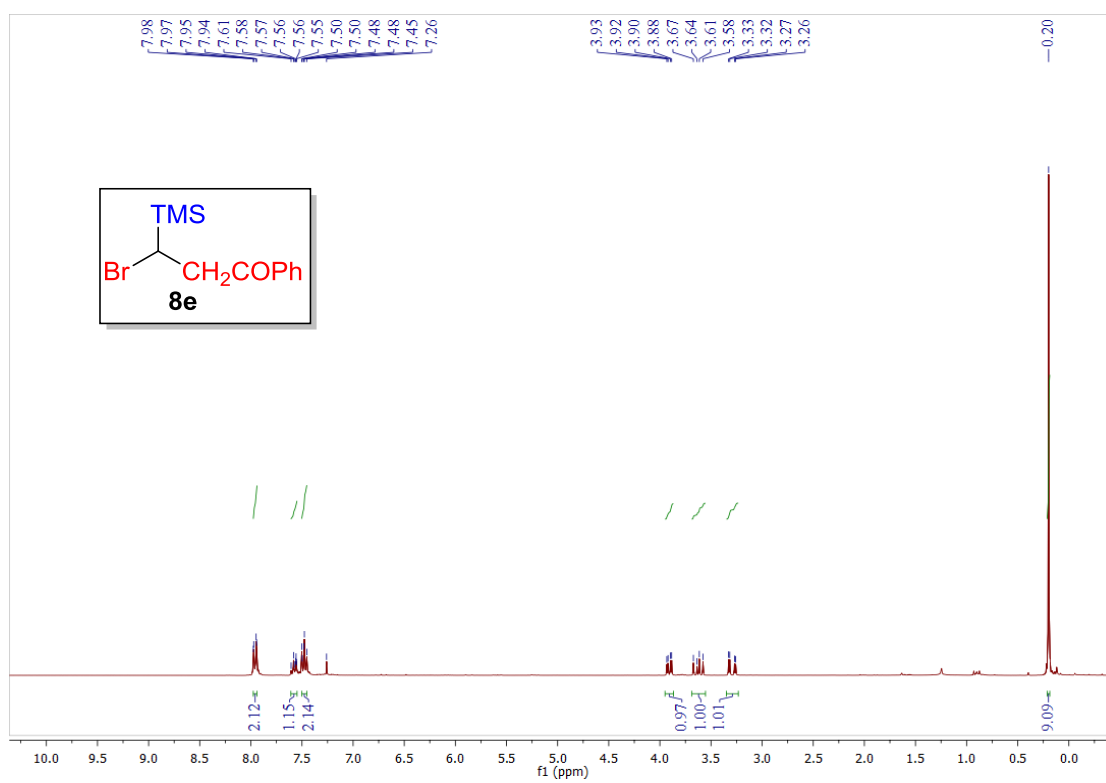



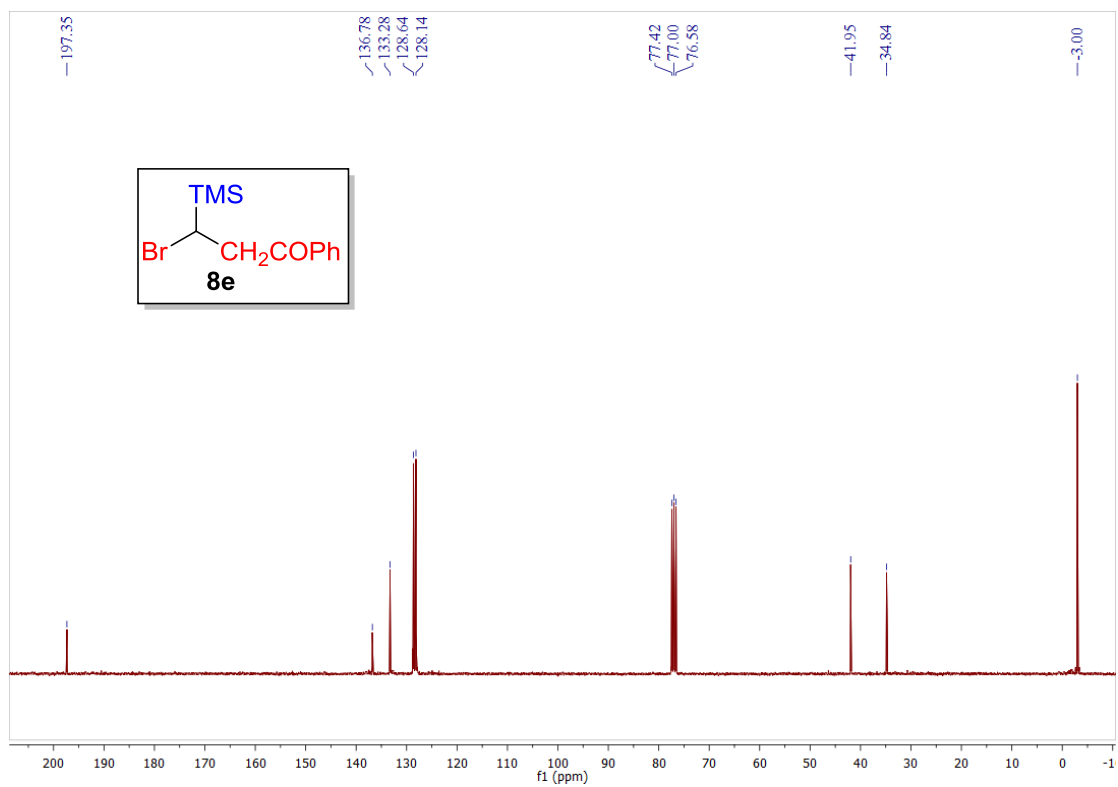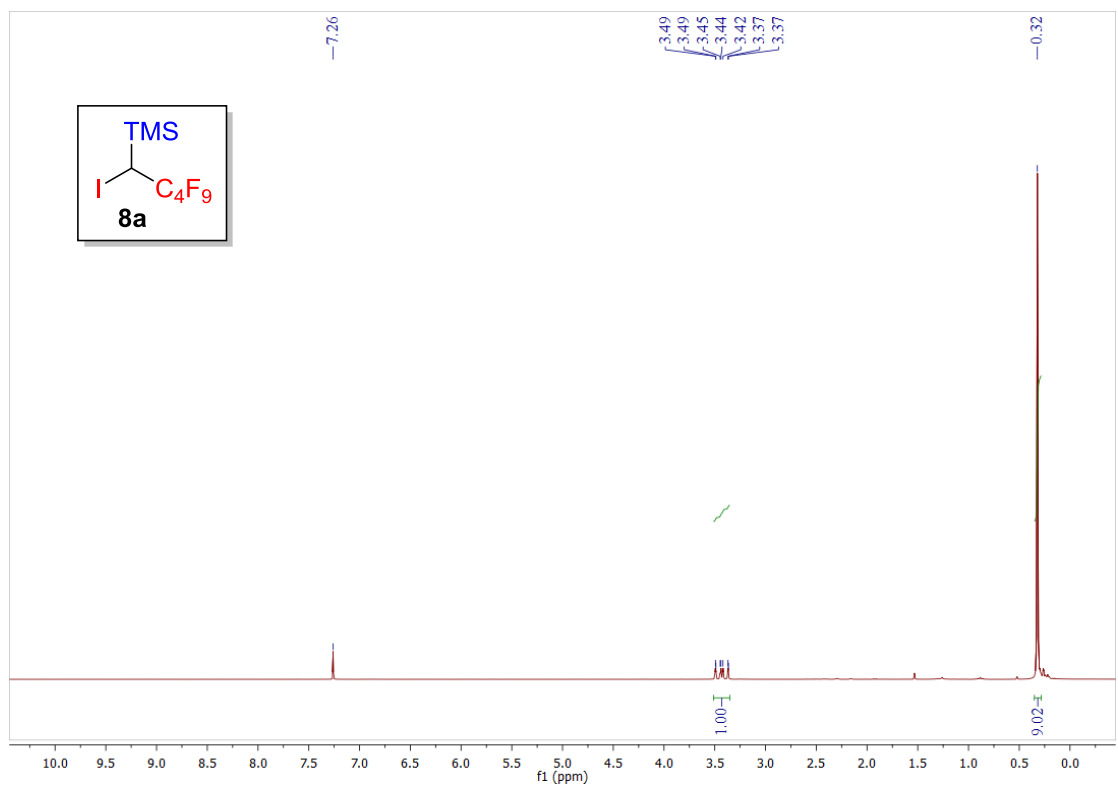

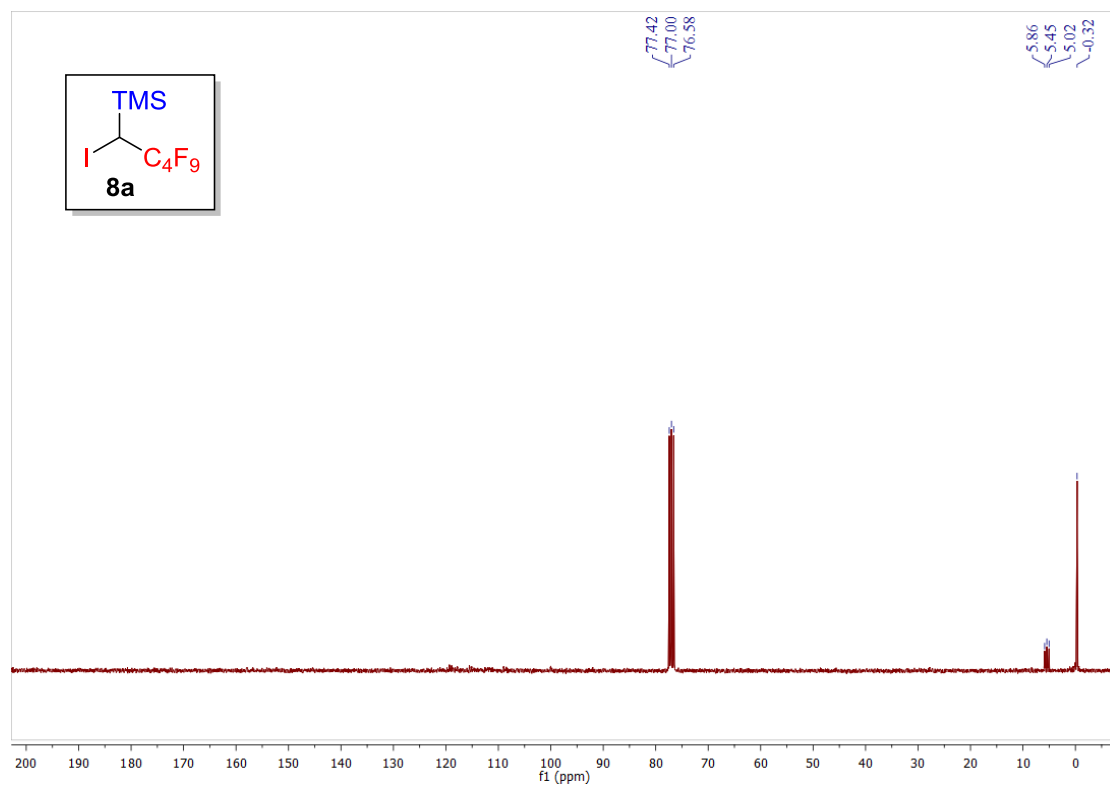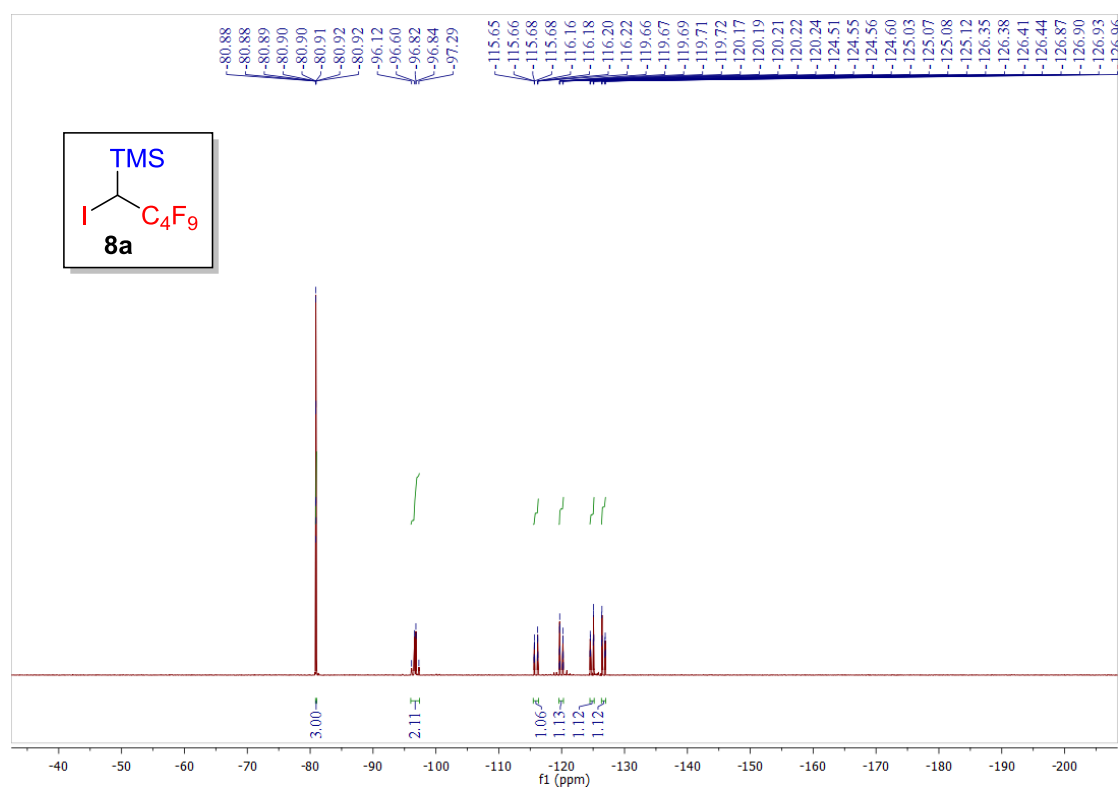

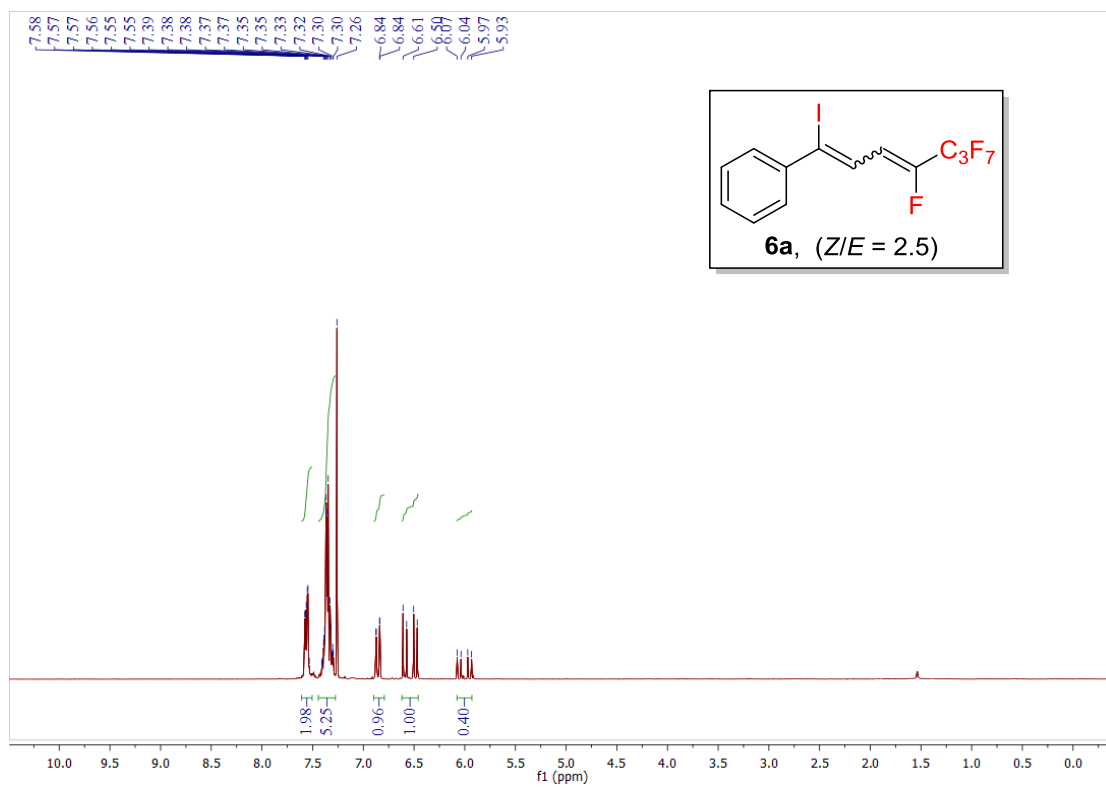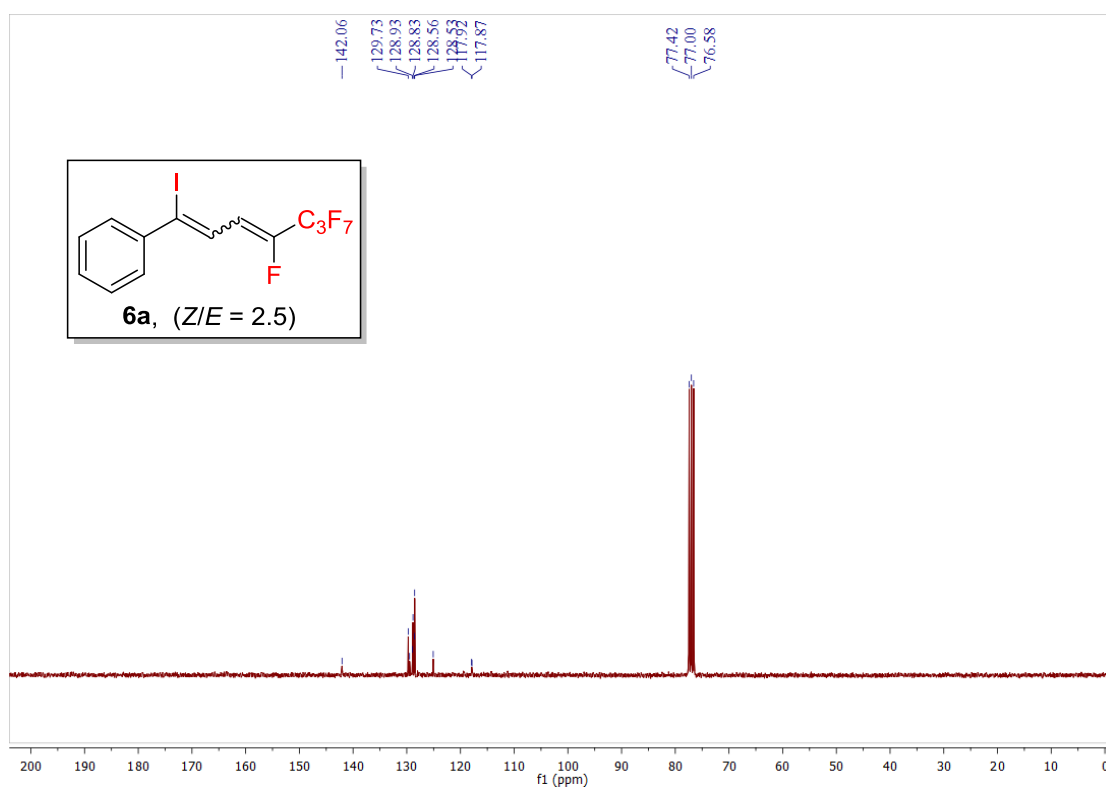

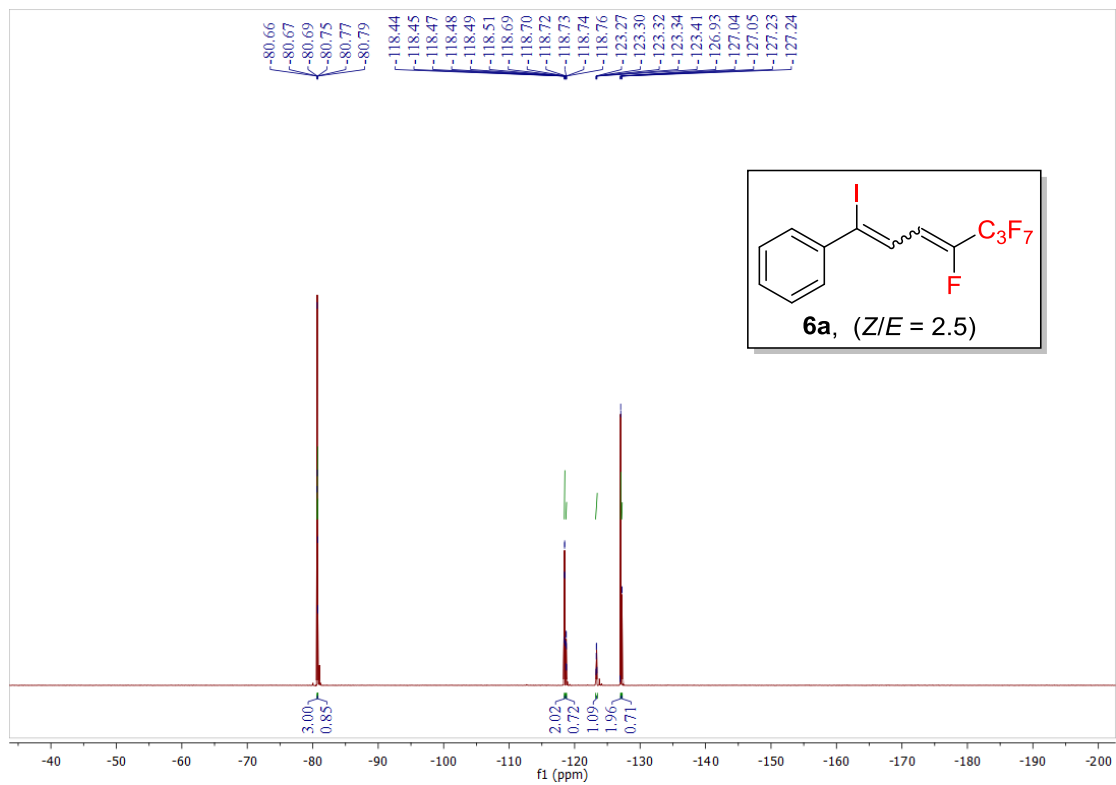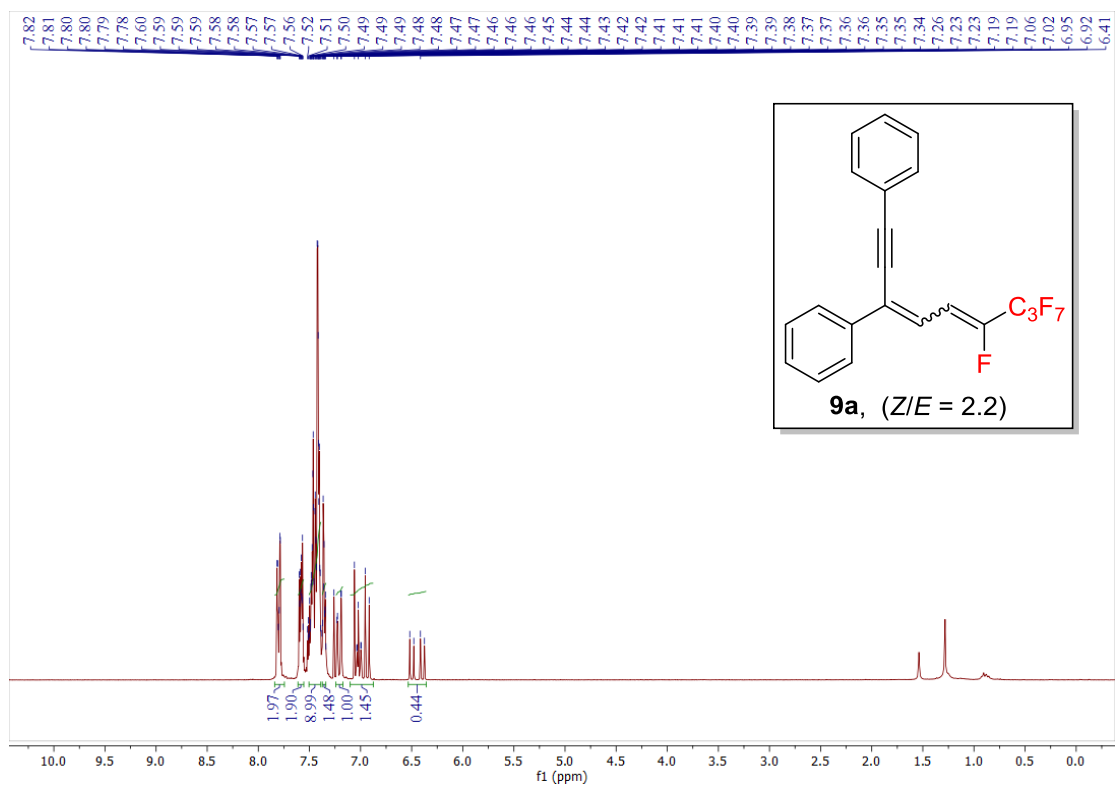

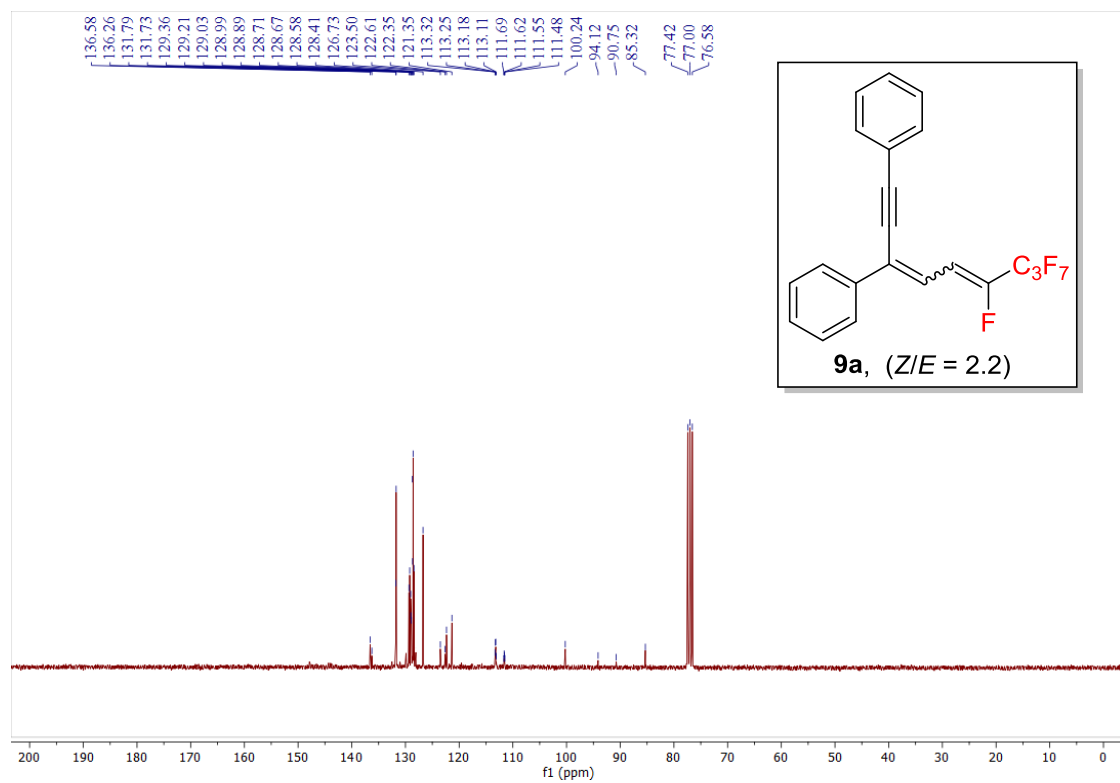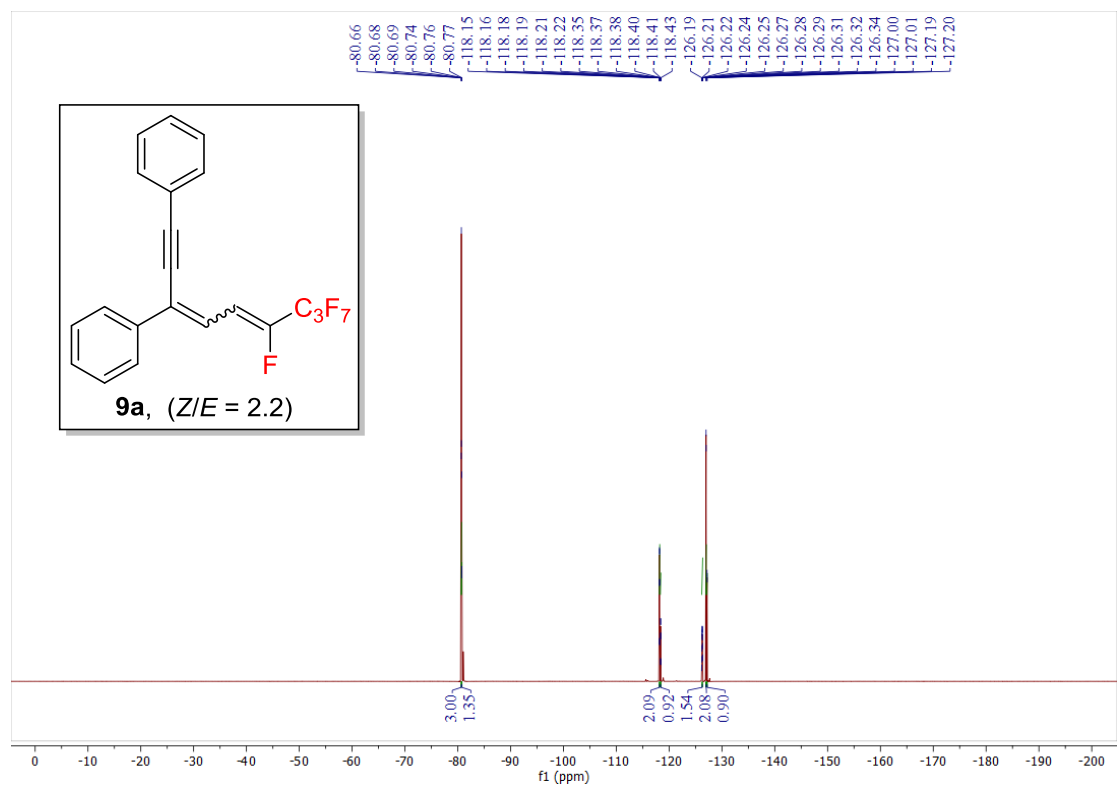

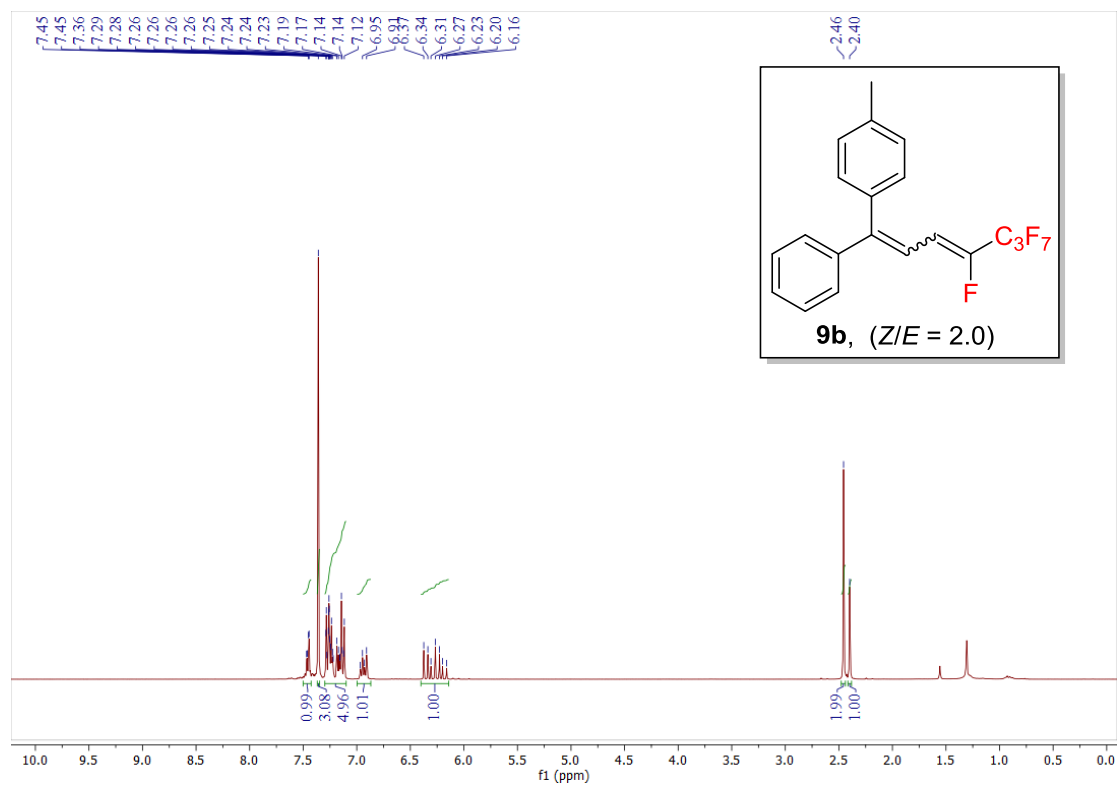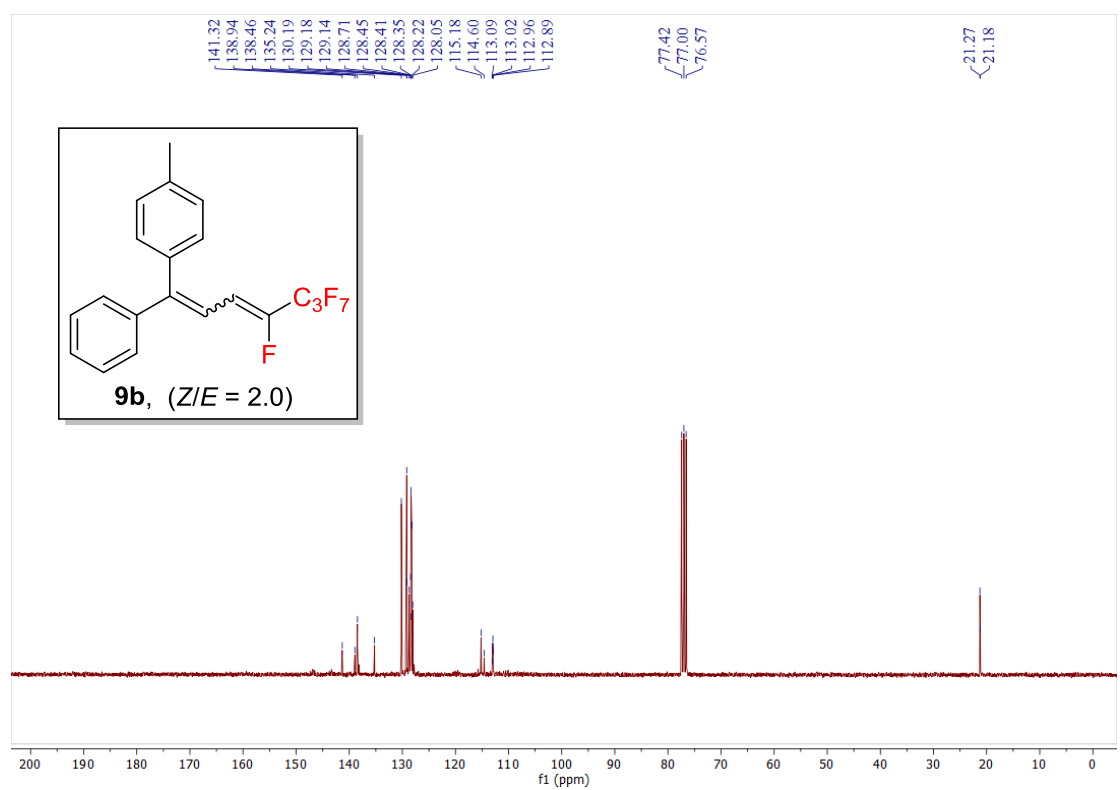

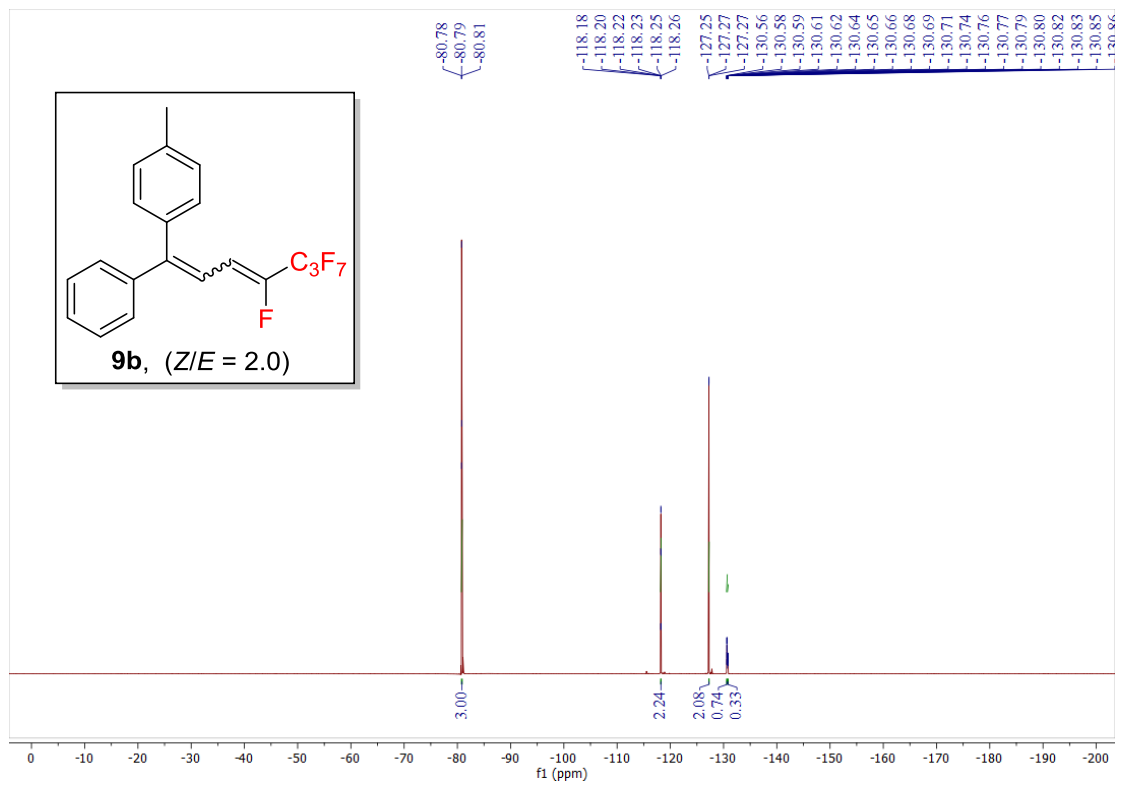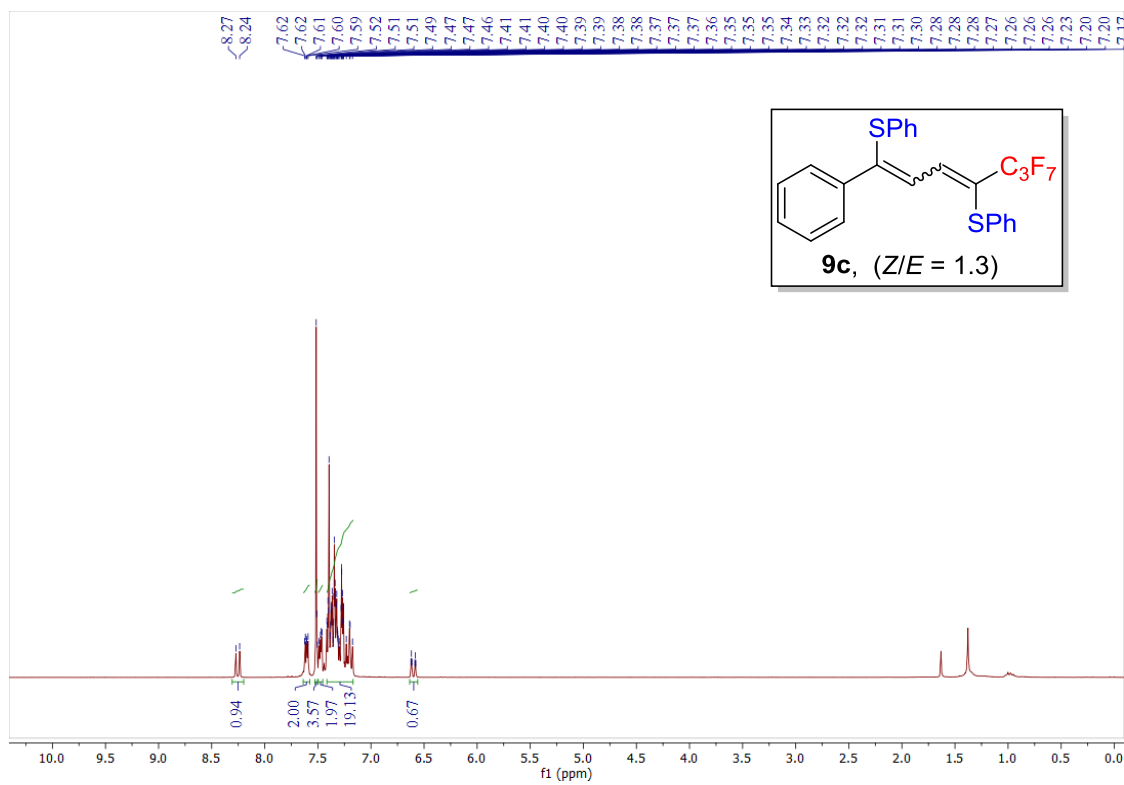

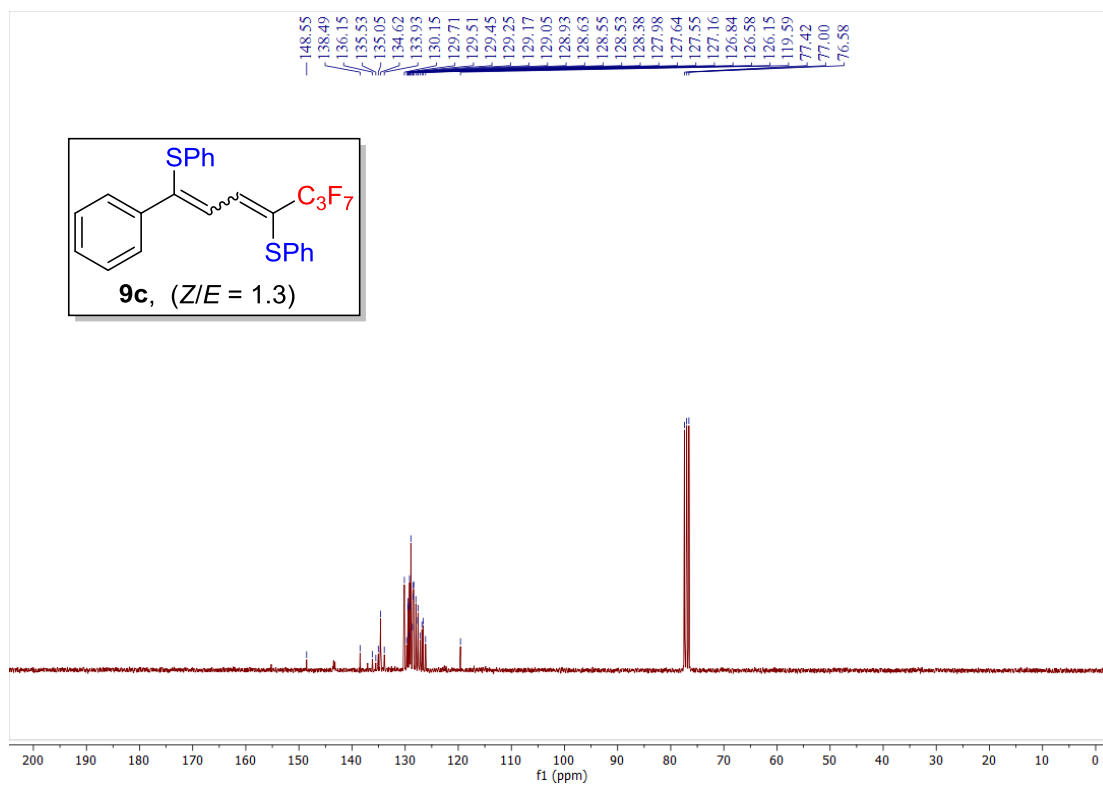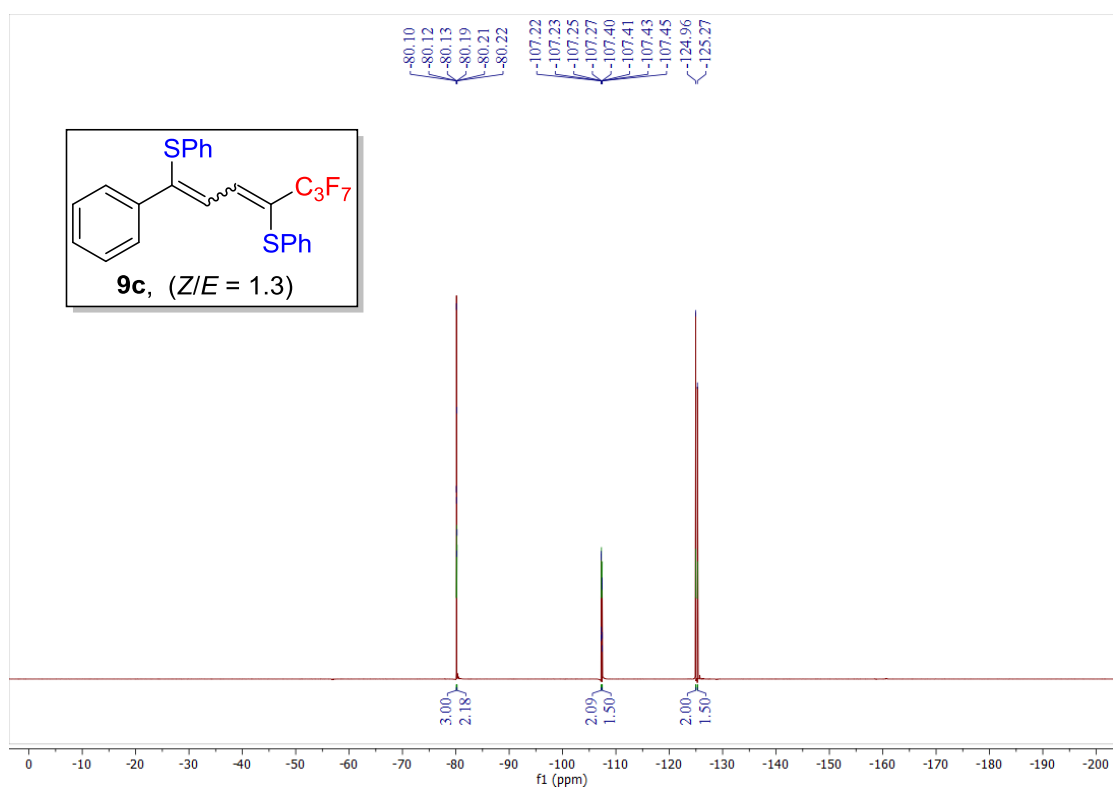

Supplement: ANIE-58-17241-s001.pdf [file ANIE-58-17241-s001.pdf]
